# Supplementary material
Source: Research Square preprint supplement (doi:10.21203/rs.3.rs-9269024/v1)
Supplement: Supplementary file 1 [file 271b52e034c6fa2bb7ee130d.xlsx]

## Sheet: Sheet1
Experienced academic bullying?	Perpetrator academic position	Gender	Ethnicity	Age	Ridicules me	Reminds me of my past failures or mistakes	Tells me my thoughts or feelings are stupid	Tells me I'm incompetent	Expresses anger at me when he/she is mad for another reason	Makes negative comments about me to others	Puts me down in front of others	Blames me to save him/herself embarrassment	Gives me the silent treatment	Does not allow me to interact with my coworkers	Doesn't give me credit for my work	Invades my privacy	Doesn't give me credit for jobs requiring a lot of effort	Breaks promises he/she makes	Lies to me	Gave me a bad/unfair recommendation	Cancelled or threatened to cancel my visa	Unnecessarily lengthened my stay in his/her lab	Took away my funding or threatened to take away my funding	Encouraged others to mistreat me	Used my data in papers/patents without acknowledging my contribution	Violated authorship contribution guidelines	Forced me to sign away my rights	Violated my intellectual property rights	Cancelled or threatened to cancel my current appointment/position	Targets' position	Response to bullying	If you did not report, what was the primary reason?	If you did report the bullying, how would you describe the outcome?	Country	State
1	Principal Investigator	Male	Middle Eastern	46-55	Can't remember	Occasionally	Can't remember	Occasionally	Very often	Occasionally	Occasionally	Very often	Can't remember	Can't remember	Very often	Very often	Very often	Very often	Very often	No	No	No	Yes	Yes	Yes	Yes	No	Yes						187	22
1	Principal Investigator	Male	White	46-55	Can't remember	Can't remember	Can't remember	Can't remember	Can't remember	Can't remember	Can't remember	Can't remember	Can't remember	Can't remember	Can't remember	Can't remember	Can't remember	Can't remember	Can't remember	Yes	Yes	Yes	Yes	Yes	Yes	Yes	Yes	Yes						187	34
1	Principal Investigator	Male	White	46-55	Can't remember	Can't remember	Can't remember	Can't remember	Can't remember	Can't remember	Can't remember	Can't remember	Can't remember	Can't remember	Can't remember	Can't remember	Can't remember	Can't remember	Can't remember	Yes	Yes	Yes	Yes	Yes	Yes	Yes	Yes	Yes						187	34
1	Principal Investigator	Male	White	46-55	Can't remember	Can't remember	Can't remember	Can't remember	Can't remember	Can't remember	Can't remember	Can't remember	Can't remember	Can't remember	Can't remember	Can't remember	Can't remember	Can't remember	Can't remember	Yes	Yes	Yes	Yes	Yes	Yes	Yes	Yes	Yes						187	34
1	Principal Investigator	Male	White	46-55	Can't remember	Can't remember	Can't remember	Can't remember	Can't remember	Can't remember	Can't remember	Can't remember	Can't remember	Can't remember	Can't remember	Can't remember	Can't remember	Can't remember	Can't remember	Yes	Yes	Yes	Yes	Yes	Yes	Yes	Yes	Yes
1	Principal Investigator	Male	White	46-55																										Postdoc
1	Principal Investigator	Male	White	46-55																														187	34
1	Principal Investigator	Male	Middle Eastern	46-55	Can't remember	Occasionally	Occasionally	Occasionally	Very often	Occasionally	Occasionally	Very often	Can't remember	Seldom	Very often	Very often	Very often	Very often	Very often	No	No	No	Yes	Yes	Yes	Yes	No	Yes		Other				187	22
1	Principal Investigator	Female	White	56-65	Seldom	Moderately	Moderately	Occasionally	Very often	Very often	Moderately	Moderately	Moderately	Very often	Very often	Very often	Very often	Very often	Moderately	Yes	No	No	Yes	Yes	Yes	Yes	No	No		Postdoc
1	Principal Investigator	Female	White	46-55	Can't remember	Can't remember	Can't remember	Can't remember	Seldom	Occasionally	Seldom	Can't remember	Can't remember	Can't remember	Occasionally	Can't remember	Seldom	Occasionally	Seldom	No	No	No	Yes	No	Yes	Yes	Yes	Yes		Postdoc				187	5
1	Group Leader	Female	White	46-55	Seldom	Very often	Occasionally	Seldom	Occasionally	Very often	Very often	Very often	Very often	Very often	Very often	Very often	Very often	Very often	Very often	No	Yes	No	Yes	Yes	Yes	Yes	Yes	Yes		Other				65
1
1	Group Leader	Female	White	46-55	Moderately	Occasionally	Moderately	Moderately	Very often	Very often	Very often	Very often	Very often	Very often	Very often	Moderately	Very often	Very often	Moderately	No	No	No	Yes	Yes	Yes	Yes	Yes	Yes		Postdoc
1
1	Principal Investigator	Male	White	36-45
1	Principal Investigator
1	Principal Investigator
1	Principal Investigator	Male	White	46-55	Very often	Occasionally	Occasionally	Moderately	Occasionally	Moderately	Very often	Very often	Very often	Very often	Occasionally	Very often	Occasionally	Occasionally	Occasionally	Yes	No	Yes	Yes	Yes	Yes	Yes	No	No	Yes	Graduate Student	Used code of silence (did not report)	Fear of retaliation	Other	82	53
1	Principal Investigator	Male	White	46-55	Occasionally	Occasionally	Occasionally	Occasionally	Occasionally	Occasionally	Occasionally	Occasionally	Occasionally	Occasionally	Very often	Occasionally	Very often	Moderately	Moderately	No	No	No	Yes	No	Yes	Yes	No	No	No	Postdoc	Reported to my institution/body responsible for your institution		Unfair and biased	185
1	Principal Investigator	Male	White	46-55	Moderately	Moderately	Occasionally	Moderately	Moderately	Moderately	Very often	Seldom	Can't remember	Can't remember	Very often	Can't remember	Very often	Can't remember	Can't remember	No	No	No	No	No	No	No	No	No	No	Postdoc	Used code of silence (did not report)	Fear of retaliation		187	5
1	Group Leader	Male	White	46-55	Very often	Occasionally	Very often	Very often	Very often	Very often	Very often	Very often	Very often	Very often	Very often	Occasionally	Very often	Occasionally	Very often	Yes	No	No	Yes	Yes	Yes	Yes	No	Yes	Yes	Postdoc	Other	Fear of retaliation	Unfair and biased	10
1	Principal Investigator	Male	White	36-45	Occasionally	Can't remember	Seldom	Can't remember	Seldom	Very often	Moderately	Seldom	Can't remember	Very often	Very often	Occasionally	Very often	Seldom	Seldom	Yes	No	No	No	Yes	Yes	Yes	No	No	No	Graduate Student	Sought support from colleagues/friends/family	Fear of retaliation	Unfair and biased	187	22
1	Principal Investigator	Male	Asian	36-45	Very often	Can't remember	Very often	Can't remember	Very often	Very often	Occasionally	Very often	Very often	Very often	Very often	Very often	Very often	Very often	Very often	Yes	Yes	No	Yes	Yes	Yes	Yes	Yes	Yes	Yes	Postdoc	Reported to my institution/body responsible for your institution		Unfair and biased	187	21
1	Principal Investigator	Male	Middle Eastern	56-65	Occasionally	Seldom	Can't remember	Occasionally	Moderately	Occasionally	Occasionally	Can't remember	Can't remember	Can't remember	Moderately	Moderately	Moderately	Seldom	Seldom	No	No	Yes	No	No	No	No	No	No	Yes	Graduate Student	Used code of silence (did not report)	Fear of retaliation	Unfair and biased	80
1	Principal Investigator	Male	Asian	36-45	Can't remember	Seldom	Seldom	Can't remember	Can't remember	Can't remember	Can't remember	Can't remember	Moderately	Moderately	Occasionally	Can't remember	Occasionally	Can't remember	Can't remember	No	No	No	No	No	No	No	No	No	No	Graduate Student	Used code of silence (did not report)	Fear of retaliation
1	Principal Investigator	Male	East Indian	36-45	Can't remember	Seldom	Can't remember	Seldom	Seldom	Can't remember	Can't remember	Seldom	Can't remember	Occasionally	Can't remember	Can't remember	Can't remember	Can't remember	Can't remember	No	No	No	No	No	No	No	No	No	No	Graduate Student	Sought support from colleagues/friends/family		Fair and unbiased	187	14
1	Principal Investigator	Male	White	56-65	Occasionally	Moderately	Very often	Moderately	Very often	Occasionally	Seldom	Occasionally	Moderately	Occasionally	Occasionally	Very often	Very often	Occasionally	Occasionally	No	No	No	No	No	No	No	No	No	Yes	Other	Sought support from colleagues/friends/family	Fear of being fired	Unfair and biased
1	Lab Supervisor	Male	Asian	36-45	Very often	Moderately	Very often	Very often	Seldom	Very often	Moderately	Can't remember	Seldom	Occasionally	Can't remember	Seldom	Very often	Moderately	Seldom	No	No	Yes	No	Yes	No	No	No	No	No	Undergraduate Student	Reported to my institution/body responsible for your institution		Fair and unbiased	187	45
1	Principal Investigator	Male	White	Over 66	Can't remember	Can't remember	Can't remember	Can't remember	Very often	Very often	Can't remember	Can't remember	Can't remember	Can't remember	Very often	Very often	Very often	Very often	Very often	Yes	Yes	No	Yes	Yes	Yes	Yes	Yes	Yes	Yes	Postdoc	Sought support from colleagues/friends/family	Visa issues	Unfair and biased	187	7
1	Principal Investigator	Male	Middle Eastern	36-45	Seldom	Occasionally	Can't remember	Seldom	Moderately	Can't remember	Can't remember	Can't remember	Very often	Occasionally	Very often	Occasionally	Very often	Occasionally	Occasionally	No	No	Yes	No	Yes	Yes	Yes	No	No	No	Graduate Student	Sought support from colleagues/friends/family	Fear of retaliation	Other	48
1	Principal Investigator	Female	Asian	46-55	Very often	Very often	Very often	Very often	Very often	Very often	Very often	Very often	Very often	Very often	Very often	Very often	Very often	Moderately	Seldom	No	No	No	No	Yes	No	No	No	No	No	Graduate Student	Used code of silence (did not report)	Fear of retaliation	Unfair and biased	187	15
1	Department Chair	Female	Hispanic	46-55	Can't remember	Seldom	Can't remember	Can't remember	Seldom	Occasionally	Seldom	Occasionally	Seldom	Seldom	Moderately	Can't remember	Very often	Seldom	Can't remember	Yes	No	No	No	No	Yes	No	No	No	No	Other	Used code of silence (did not report)	Fear of retaliation		187	44
1	Group Leader	Female	White	46-55	Can't remember	Occasionally	Very often	Moderately	Seldom	Very often	Very often	Very often	Seldom	Can't remember	Very often	Seldom	Very often	Occasionally	Occasionally	Yes	Yes	No	Yes	Yes	Yes	Yes	No	No	Yes	Postdoc	Sought support from colleagues/friends/family	Visa issues	Unfair and biased	185
1	Principal Investigator	Male	White	56-65	Moderately	Moderately	Moderately	Moderately	Moderately	Moderately	Moderately	Very often	Very often	Occasionally	Occasionally	Seldom	Very often	Very often	Very often	Yes	No	No	No	No	Yes	Yes	No	No	Yes	Graduate Student	Used code of silence (did not report)	Fear of retaliation	Other	187	33
1	Principal Investigator	Male	Mixed Race	36-45	Very often	Very often	Moderately	Moderately	Moderately	Very often	Seldom	Very often	Seldom	Can't remember	Can't remember	Can't remember	Can't remember	Can't remember	Moderately	Yes	No	No	Yes	Yes	No	No	No	No	Yes	Graduate Student	Reported to my institution/body responsible for your institution		Unfair and biased	187	22
1	Principal Investigator	Male	White	46-55	Occasionally	Can't remember	Can't remember	Seldom	Moderately	Seldom	Moderately	Very often	Very often	Seldom	Seldom	Moderately	Seldom	Seldom	Very often	No	No	Yes	No	Yes	No	Yes	No	No	No	Postdoc	Used code of silence (did not report)	Fear of retaliation		187
1	Department Chair	Male	White	46-55	Occasionally	Occasionally	Moderately	Can't remember	Can't remember	Occasionally	Seldom	Occasionally	Seldom	Occasionally	Occasionally	Can't remember	Can't remember	Very often	Moderately	Yes	No	No	No	No	No	No	No	No	No	Other	Reported to my institution/body responsible for your institution		Unfair and biased	187	23
1	Principal Investigator	Male	Middle Eastern	46-55	Can't remember	Very often	Seldom	Seldom	Very often	Moderately	Moderately	Very often	Can't remember	Can't remember	Very often	Very often	Very often	Very often	Very often	Yes	No	Yes	Yes	Yes	Yes	Yes	Yes	Yes	Yes	Postdoc	Reported to my institution/body responsible for your institution	Other	Unfair and biased	187	22
1	Principal Investigator	Male	White	46-55	Can't remember	Seldom	Can't remember	Can't remember	Can't remember	Can't remember	Can't remember	Seldom	Very often	Can't remember	Can't remember	Can't remember	Can't remember	Moderately	Seldom	No	No	Yes	Yes	No	No	No	No	No	No	Graduate Student	Used code of silence (did not report)	Fear of retaliation		187
1	Principal Investigator	Male	Black or African American	36-45	Very often	Can't remember	Can't remember	Occasionally	Occasionally	Very often	Very often	Occasionally	Can't remember	Can't remember	Very often	Can't remember	Very often	Can't remember	Occasionally	No	No	No	Yes	No	Yes	No	No	Yes	No	Graduate Student	Reported to my institution/body responsible for your institution		Unfair and biased	187	34
1	Principal Investigator	Male	White	56-65	Occasionally	Moderately	Can't remember	Very often	Very often	Very often	Very often	Moderately	Moderately	Moderately	Very often	Occasionally	Very often	Moderately	Occasionally	Yes	No	Yes	No	Yes	Yes	Yes	No	Yes	Yes	Graduate Student	Other	Fear of retaliation		187	45
1	Lab Supervisor	Male	Asian	36-45			Moderately	Moderately			Very often				Very often							Yes								Graduate Student	Used code of silence (did not report)	Fear of being fired	Unfair and biased
1	Principal Investigator	Male	Asian	36-45	Moderately	Occasionally	Very often	Very often	Very often	Very often	Very often	Very often	Very often	Moderately	Very often	Moderately	Very often	Very often	Very often	Yes	Yes	Yes	No	Yes	Yes	Yes	Yes	Yes	Yes	Postdoc	Used code of silence (did not report)	Visa issues		187	22
1	Principal Investigator	Male	White	46-55	Seldom	Can't remember	Occasionally	Can't remember	Very often	Can't remember	Can't remember	Seldom	Can't remember	Can't remember	Can't remember	Can't remember	Occasionally	Can't remember	Can't remember	No	No	No	No	No	Yes	Yes	No	No	No	Undergraduate Student	Used code of silence (did not report)	Fear of being fired		187	21
1	Department Chair	Male	White	46-55	Moderately	Moderately	Moderately	Can't remember	Moderately	Can't remember	Can't remember	Moderately	Moderately	Can't remember	Can't remember	Can't remember	Moderately	Can't remember	Can't remember	Yes	No	No	No	Yes	No	No	No	Yes	Yes	Other	Reported to my institution/body responsible for your institution		Unfair and biased	31
1	Department Chair	Female	Hispanic	36-45	Occasionally	Moderately	Moderately	Occasionally	Seldom	Moderately	Can't remember	Occasionally	Very often	Can't remember	Occasionally	Very often	Can't remember	Can't remember	Can't remember	Yes	No	No	No	Yes	No	No	No	No	No	Graduate Student	Used code of silence (did not report)	Other		7
1	Lab Supervisor	Female	White	46-55	Can't remember	Can't remember	Can't remember	Can't remember	Occasionally	Seldom	Occasionally	Occasionally	Seldom	Can't remember	Can't remember	Can't remember	Can't remember	Can't remember	Can't remember	No	No	No	No	No	No	No	No	No	Yes	Undergraduate Student	Used code of silence (did not report)	Fear of retaliation		187	3
1	Principal Investigator	Male	Middle Eastern	46-55	Very often	Moderately	Occasionally	Very often	Very often	Occasionally	Very often	Seldom	Very often		Very often	Can't remember	Very often	Very often	Can't remember	No	No	No	No	No	No	Yes	No	No	No	Graduate Student	Used code of silence (did not report)	Fear of retaliation	Other	187	5
1	Principal Investigator	Female	East Indian	46-55	Very often	Very often	Occasionally	Very often	Can't remember	Very often	Very often	Can't remember	Moderately	Can't remember	Seldom	Seldom	Very often	Moderately	Occasionally	No	No	No	Yes	Yes		No	No	Yes	Yes	Graduate Student	Reported to my institution/body responsible for your institution		Unfair and biased	187	45
1	Principal Investigator	Female	White	56-65	Occasionally	Very often	Occasionally	Seldom	Very often	Very often	Very often	Very often	Very often	Very often	Moderately	Can't remember	Moderately	Moderately	Very often	No	No	No	No	No	No	No	No	No	No	Graduate Student	Sought support from colleagues/friends/family	Fear of retaliation	Unfair and biased	187	33
1	Department Chair	Female	White	46-55	Can't remember	Very often	Moderately	Occasionally	Moderately	Moderately	Seldom	Very often	Very often	Very often	Very often	Can't remember	Very often	Very often	Occasionally	Yes	No	Yes	Yes	Yes	No	No	No	No	Yes	Other	Sought support from colleagues/friends/family	Fear of retaliation		187	39
1	Principal Investigator	Male	Middle Eastern	36-45	Can't remember	Moderately	Occasionally	Moderately	Very often	Can't remember	Seldom	Very often	Moderately	Occasionally	Very often	Can't remember	Very often	Very often	Very often	No	Yes	Yes	Yes	No	Yes	Yes	Yes	Yes	No	Graduate Student	Used code of silence (did not report)	Fear of retaliation	Unfair and biased	187	31
1	Department Chair	Male	White	46-55	Can't remember	Occasionally	Can't remember	Occasionally	Can't remember	Moderately	Occasionally	Moderately	Very often	Seldom	Moderately	Can't remember	Occasionally	Occasionally	Moderately	Yes	No	No	Yes	Yes	Yes	No	No	No	Yes	Other	Reported to my institution/body responsible for your institution		Unfair and biased	187	46
1	Principal Investigator	Female	White	56-65	Moderately	Very often	Very often	Very often	Moderately	Very often	Very often	Occasionally	Occasionally	Can't remember	Moderately	Seldom	Very often	Seldom	Seldom	No	No	No	No	Yes	Yes	Yes	Yes	Yes	Yes	Graduate Student	Used code of silence (did not report)	Fear of retaliation		187	5
1	Department Chair	Male	White	Over 66	Moderately	Very often	Moderately	Moderately	Can't remember	Very often	Very often	Can't remember	Can't remember	Can't remember	Can't remember	Can't remember	Very often	Can't remember	Moderately	Yes	No	No	No	Yes	No	No	No	No	Yes	Graduate Student	Sought support from colleagues/friends/family	Fear of retaliation		187	26
1	Principal Investigator	Female	White	46-55	Occasionally	Moderately	Occasionally	Seldom	Occasionally	Very often	Very often	Very often	Moderately	Occasionally	Moderately	Seldom	Very often	Very often	Very often	Yes	No	No	Yes	Yes	Yes	Yes	No	Yes	Yes	Other	Used code of silence (did not report)	Fear of retaliation	Other	187	6
1	Principal Investigator	Female	White	Over 66	Seldom	Seldom	Occasionally	Moderately	Seldom	Seldom	Seldom	Very often	Can't remember	Seldom	Moderately	Occasionally	Occasionally	Moderately	Occasionally	Yes	No	Yes	No	No	No	No	No	No	No	Undergraduate Student	Reported to my institution/body responsible for your institution		Unfair and biased	187	41
1	Principal Investigator	Male	Asian	36-45	Seldom	Seldom	Seldom	Can't remember	Occasionally	Very often	Very often	Very often	Very often	Can't remember	Very often	Seldom	Very often	Very often	Very often	Yes	Yes	Yes	Yes	Yes	Yes	Yes	No	Yes	Yes	Graduate Student	Sought support from colleagues/friends/family	Fear of retaliation	Unfair and biased	78
1	Group Leader	Male	White	46-55	Can't remember													Occasionally					Yes							Visiting Scientist/Researcher	Sought support from colleagues/friends/family	Visa issues	Fair and unbiased	65
1	Principal Investigator	Male	White0	36-45	Occasionally	Very often	Occasionally	Seldom	Seldom	Occasionally	Occasionally	Moderately	Very often	Moderately	Occasionally	Moderately	Moderately	Very often	Moderately	No	No	Yes	No	Yes	No	No	No	Yes	Yes	Graduate Student	Sought support from colleagues/friends/family	Fear of retaliation
1	Principal Investigator	Male	White	56-65	Occasionally	Seldom	Can't remember	Can't remember	Very often	Very often	Seldom	Can't remember	Seldom	Can't remember	Occasionally	Occasionally	Moderately	Occasionally	Seldom	Yes	No	Yes	Yes	Yes	Yes	Yes	No	No	No	Postdoc	Sought support from colleagues/friends/family	Fear of retaliation	Other	185
1	Lab Supervisor	Female	Middle Eastern	36-45	Can't remember	Can't remember	Can't remember	Very often	Can't remember	Moderately	Occasionally	Can't remember	Very often	Moderately	Occasionally	Can't remember	Very often	Moderately	Seldom	No	No	No		No	Yes		No	No		Undergraduate Student	Used code of silence (did not report)	Fear of retaliation	Unfair and biased	80
1	Lab Supervisor	Male	Asian	46-55	Moderately	Moderately	Occasionally	Moderately	Seldom	Very often	Very often	Can't remember	Can't remember	Moderately	Moderately	Moderately	Moderately	Very often	Moderately	No	No	Yes	No	Yes	No	No	Yes	No	No	Undergraduate Student	Used code of silence (did not report)	Other	Unfair and biased	80
1	Principal Investigator	Male	White	36-45	Moderately	Occasionally	Moderately	Very often	Moderately	Very often	Occasionally	Occasionally	Moderately	Occasionally	Very often	Can't remember	Very often	Very often	Moderately	No	No	No	Yes	No	Yes	Yes	No	No	No	Postdoc	Used code of silence (did not report)	Fear of retaliation	Other	45
1	Principal Investigator	Male	Asian	36-45	Very often	Moderately	Seldom	Very often	Very often	Moderately	Seldom	Moderately	Occasionally	Occasionally	Very often	Can't remember	Occasionally	Moderately	Occasionally	No	No	Yes	Yes	No	Yes	Yes	No	Yes	Yes	Visiting Scientist/Researcher	Used code of silence (did not report)	Fear of retaliation		187	22
1	Principal Investigator	Female	Middle Eastern	36-45	Moderately	Very often	Can't remember	Can't remember	Occasionally	Can't remember	Occasionally	Occasionally	Can't remember	Seldom	Seldom	Moderately	Moderately	Very often	Occasionally	Yes	No	Yes	No	No	No	No	No	No	No	Graduate Student	Used code of silence (did not report)	Fear of retaliation	Other	80
1	Principal Investigator	Male	White	56-65	Occasionally	Occasionally	Seldom	Can't remember	Moderately	Moderately	Seldom	Seldom	Seldom	Can't remember	Very often	Can't remember	Very often	Very often	Very often	Yes	No	Yes	Yes	Yes	Yes	No	No	Yes	Yes	Other	Other	Fear of retaliation	Other	187
1	Department Chair	Male	White	56-65	Occasionally	Very often	Moderately	Very often	Very often	Very often	Very often	Very often	Seldom	Very often	Very often	Very often	Very often	Very often	Very often	Yes	No	Yes	Yes	Yes	No	No	Yes	No	Yes	Graduate Student	Other	Fear of retaliation	Unfair and biased	187	15
1	Department Chair	Female	Asian	36-45	Moderately	Occasionally	Can't remember	Occasionally	Can't remember	Moderately	Moderately	Occasionally	Very often	Can't remember	Can't remember	Occasionally	Can't remember	Can't remember	Can't remember	Yes	No	No	No	Yes	No	No	No	No	No	Other	Sought support from colleagues/friends/family	Fear of retaliation	Unfair and biased	187	5
1	Group Leader	Male	Asian	36-45	Seldom	Can't remember	Seldom	Moderately	Very often	Moderately	Very often	Moderately	Seldom	Moderately	Moderately	Moderately	Very often	Very often	Very often	Yes	No	Yes	No	Yes	No	Yes	No	Yes	No	Graduate Student	Used code of silence (did not report)	Fear of retaliation	Fair and unbiased	36
1	Principal Investigator	Male	Middle Eastern	36-45	Seldom	Moderately	Occasionally	Occasionally	Moderately	Seldom	Occasionally	Occasionally	Very often	Moderately	Very often	Occasionally	Very often	Very often	Moderately	No	No	Yes	Yes	No	No	Yes	No	Yes	No	Graduate Student	Used code of silence (did not report)	Fear of retaliation		31
1	Principal Investigator	Male	White	Over 66	Seldom	Seldom	Occasionally	Occasionally	Can't remember	Can't remember	Can't remember	Can't remember	Can't remember	Occasionally	Very often	Can't remember	Very often	Very often		Yes	No	Yes	Yes	Yes	Yes	Yes	No	Yes	Yes	Graduate Student	Used code of silence (did not report)	Fear of retaliation		48
1	Department Chair	Male	Middle Eastern	56-65	Seldom	Can't remember	Can't remember	Can't remember	Very often	Seldom	Moderately	Seldom	Occasionally	Seldom	Can't remember	Seldom	Seldom	Can't remember	Can't remember	No	No	No	Yes	No	No	No	No	No	Yes	Other	Used code of silence (did not report)	Fear of retaliation	Other	31
1	Principal Investigator	Male	Middle Eastern	36-45	Seldom	Occasionally	Seldom	Moderately	Very often	Occasionally	Occasionally	Moderately	Seldom	Can't remember	Moderately	Occasionally	Can't remember	Moderately	Very often	Yes	Yes	Yes	Yes	Yes	Yes	Yes	No	Yes	Yes	Graduate Student	Sought support from colleagues/friends/family	Fear of retaliation	Unfair and biased	187	39
1	Principal Investigator	Male	Asian	36-45	Seldom	Seldom	Can't remember	Can't remember	Seldom	Can't remember	Moderately	Occasionally	Moderately	Seldom	Moderately	Moderately	Occasionally	Occasionally	Very often	Yes	No	Yes	Yes	No	Yes	No	Yes	Yes	Yes	Graduate Student	Used code of silence (did not report)	Fear of retaliation	Other	31
1	Principal Investigator	Female	White	46-55	Seldom	Occasionally	Moderately	Seldom	Occasionally	Moderately	Occasionally	Moderately	Moderately	Occasionally	Moderately	Moderately	Moderately	Can't remember	Moderately	Yes	No	No	No	Yes	Yes	Yes	No	No	No	Graduate Student	Reported to my institution/body responsible for your institution		Unfair and biased	185
1	Group Leader	Female	Middle Eastern	46-55	Occasionally	Occasionally	Can't remember	Occasionally	Occasionally	Occasionally	Moderately	Can't remember	Can't remember	Can't remember	Occasionally	Can't remember	Seldom	Can't remember	Can't remember	No	No	No	No	No	No	No	No	No	No	Graduate Student	Used code of silence (did not report)	Other	Unfair and biased	80
1	Group Leader	Male	Middle Eastern	46-55	Seldom	Seldom	Occasionally	Seldom	Can't remember	Can't remember	Can't remember	Can't remember	Can't remember	Can't remember	Can't remember	Can't remember	Can't remember	Very often	Can't remember	No										Graduate Student	Sought support from colleagues/friends/family	Fear of being fired	Unfair and biased	80
1	Principal Investigator	Female	White	56-65	Occasionally	Moderately	Seldom	Moderately	Very often	Very often	Very often	Very often	Occasionally	Very often	Very often	Very often	Very often	Very often	Very often	Yes	No	Yes	Yes	Yes	Yes	Yes	Yes	No	Yes	Postdoc	Reported to my institution/body responsible for your institution	Other	Unfair and biased
1	Principal Investigator	Male	White	46-55	Seldom	Seldom	Can't remember	Occasionally	Can't remember	Can't remember	Can't remember	Seldom	Can't remember	Can't remember	Occasionally	Can't remember	Occasionally	Can't remember	Can't remember	No	No	No	No	No	Yes	Yes	No	Yes	No	Postdoc	Used code of silence (did not report)	Other		185
1	Lab Supervisor	Male	White	46-55	Can't remember	Very often	Very often	Very often	Very often	Very often	Very often	Very often	Can't remember	Can't remember	Very often	Very often	Very often	Very often	Can't remember	No	No	Yes	No	No	No	No	No	No	Yes	Visiting Scientist/Researcher	Other	Fear of being fired	Unfair and biased	169	53
1	Department Chair	Male	White	56-65	Moderately	Seldom	Seldom	Occasionally	Seldom	Can't remember	Can't remember	Seldom	Very often	Very often	Can't remember	Very often	Can't remember	Can't remember	Moderately	Yes	No	No	Yes	Yes	No	No	No	No	Yes	Graduate Student	Used code of silence (did not report)	Other	Other	65
1	Principal Investigator	Male	Middle Eastern	36-45	Moderately	Very often	Moderately	Occasionally	Moderately	Moderately	Moderately	Very often	Moderately	Seldom	Occasionally	Occasionally	Moderately	Moderately	Moderately	Yes	Yes	Yes	Yes	Yes	No	Yes	No	Yes	Yes	Graduate Student	Reported to my institution/body responsible for your institution		Other	187	39
1	Principal Investigator	Female	White	46-55	Seldom	Can't remember	Occasionally	Can't remember	Seldom	Can't remember	Seldom	Seldom	Seldom	Seldom	Seldom	Can't remember	Seldom	Seldom	Seldom	Yes	No	No	No	Yes	Yes	Yes	No	Yes	No	Postdoc	Reported to my institution/body responsible for your institution	Fear of retaliation	Other	65	53
1	Principal Investigator	Male	East Indian	Over 66	Moderately	Can't remember	Very often	Can't remember	Can't remember	Can't remember	Can't remember	Can't remember	Can't remember	Can't remember	Very often	Very often	Occasionally	Can't remember	Can't remember	No	Yes	Yes	Yes	No	Yes	Yes	No	No	Yes	Graduate Student	Reported to my institution/body responsible for your institution		Unfair and biased		36
1	Department Chair	Female	White	36-45									Very often					Very often	Very often	Yes	No	Yes	No					Yes	Yes	Visiting Scientist/Researcher	Sought support from colleagues/friends/family	Fear of retaliation		185
1	Department Chair	Female	White	36-45	Moderately	Very often	Very often	Occasionally	Very often	Very often	Very often	Very often	Very often	Very often	Moderately	Seldom	Very often	Very often	Very often	Yes	No	No	Yes	Yes	Yes	Yes	No	Yes	No	Other	Other	Fear of retaliation	Unfair and biased	185
1	Lab Supervisor	Male	Mixed Race	36-45	Occasionally	Can't remember	Can't remember	Occasionally	Can't remember	Occasionally	Occasionally	Occasionally	Occasionally	Can't remember	Occasionally	Occasionally	Occasionally	Occasionally	Occasionally	No	No	Yes	No	Yes	No	No	Yes	No	No	Graduate Student	Reported to my institution/body responsible for your institution	Other	Unfair and biased	161
1	Department Chair	Male	White	36-45	Seldom	Occasionally	Seldom	Occasionally	Very often	Occasionally	Occasionally	Seldom	Very often	Seldom	Seldom	Can't remember	Can't remember	Can't remember	Can't remember	No	No	No	No	No	No	No	No	No	No	Other	Sought support from colleagues/friends/family	Other	Unfair and biased	185
1	Lab Supervisor	Female	White	36-45	Occasionally	Moderately	Very often	Moderately	Very often	Moderately	Seldom	Very often	Moderately	Can't remember	Moderately	Seldom	Moderately	Very often	Very often	Yes	No	Yes	Yes	No	Yes	No	No	No	Yes	Graduate Student	Used code of silence (did not report)	Visa issues	Unfair and biased	187	39
1	Principal Investigator	Male	Middle Eastern	36-45	Very often		Can't remember	Seldom	Very often	Very often	Very often	Very often	Can't remember	Can't remember	Can't remember	Can't remember	Very often	Can't remember	Can't remember	No	No	No	No	No	No	No	No	No	No	Visiting Scientist/Researcher	Used code of silence (did not report)	Other		187	22
1	Department Chair	Male	White	Over 66	Can't remember	Can't remember	Can't remember	Can't remember	Can't remember	Can't remember	Can't remember	Can't remember	Occasionally	Can't remember	Can't remember	Can't remember	Occasionally	Occasionally	Occasionally	No	No	No	No	No	No	No	No	No	No	Other	Other	Fear of retaliation	Other	187	5
1	Principal Investigator	Male	White	46-55	Seldom	Occasionally	Occasionally	Moderately	Very often	Occasionally	Seldom	Seldom	Very often	Occasionally	Occasionally	Can't remember	Can't remember	Can't remember	Can't remember	No	No	No	Yes	No	No	No	No	No	Yes	Visiting Scientist/Researcher	Sought support from colleagues/friends/family	Fear of retaliation		169
1	Principal Investigator	Male	White	56-65	Very often	Occasionally	Occasionally	Very often	Can't remember	Very often	Very often	Very often	Very often	Very often	Can't remember	Occasionally	Occasionally	Very often	Very often	Yes	Yes	No	Yes	Yes	No	No	Yes	No	Yes	Postdoc	Used code of silence (did not report)	Fear of retaliation	Unfair and biased	187	22
1	Department Chair	Male	White	46-55	Can't remember	Seldom	Occasionally	Can't remember	Seldom	Moderately	Moderately	Moderately	Seldom	Can't remember	Moderately	Can't remember	Occasionally	Moderately	Can't remember	No	No	No	No	Yes	No	No	No	No	No	Other	Sought support from colleagues/friends/family	Other		48
1	Department Chair	Other genders	White0	Over 66
1	Principal Investigator	Male	White	36-45	Seldom	Occasionally	Occasionally	Seldom	Seldom	Moderately	Seldom	Occasionally	Occasionally	Seldom	Moderately	Seldom	Moderately	Very often	Very often	Yes	No	Yes	Yes	No	Yes	Yes	No	No	Yes	Graduate Student	Reported to my institution/body responsible for your institution	Fear of retaliation	Unfair and biased	169
1	Principal Investigator	Male	White	56-65	Seldom	Can't remember	Can't remember	Can't remember	Seldom	Seldom	Can't remember	Can't remember	Occasionally	Can't remember	Occasionally	Can't remember	Occasionally	Very often	Very often	No	No	No	Yes	No	Yes	Yes	No	Yes	Yes	Postdoc	Used code of silence (did not report)	Fear of retaliation		187	5
1	Principal Investigator	Male	Middle Eastern	36-45	Very often	Very often	Very often	Very often	Very often	Moderately	Occasionally	Moderately	Occasionally	Very often	Very often	Moderately	Very often	Very often	Very often	No	Yes	Yes	Yes	No	No	Yes	No	Yes	No	Graduate Student	Used code of silence (did not report)	Fear of retaliation		187	14
1	Group Leader	Male	White	36-45					Very often					Very often					Very often				No			No			No	Other	Reported to my institution/body responsible for your institution		Other	122
1	Principal Investigator	Male	White	36-45	Occasionally	Seldom	Seldom	Can't remember	Can't remember	Can't remember	Can't remember	Occasionally	Very often	Can't remember	Very often	Seldom	Very often	Can't remember	Can't remember	No	Yes	Yes	No	No	Yes	Yes	No	No	Yes	Graduate Student	Sought support from colleagues/friends/family	Fear of retaliation	Unfair and biased	17
1	Group Leader	Female	White	25-35	Can't remember	Moderately	Moderately	Seldom	Can't remember	Moderately	Moderately	Can't remember	Very often	Can't remember	Occasionally	Moderately	Moderately	Can't remember	Seldom	No	No	No	No	No	No	No	No	No	No	Graduate Student	Reported to my institution/body responsible for your institution	Other	Unfair and biased	185
1	Principal Investigator	Female	White	46-55	Moderately	Moderately	Moderately	Moderately	Very often	Very often	Moderately	Very often	Seldom	Seldom	Occasionally	Moderately	Very often	Moderately	Can't remember	Yes	Yes	Yes	No	Yes	Yes	Yes	No	Yes	No	Graduate Student	Reported to my institution/body responsible for your institution		Other	9	53
1	Principal Investigator	Female	White	46-55	Very often	Moderately	Moderately	Occasionally	Very often	Very often	Very often	Very often	Very often	Moderately	Very often	Moderately	Very often	Very often	Very often	Yes	No	No	Yes	Yes	Yes	Yes	No	No	Yes	Other	Sought support from colleagues/friends/family	Fear of being fired	Unfair and biased	82
1	Group Leader	Male	Asian	25-35	Very often	Very often	Occasionally	Moderately	Moderately	Very often	Moderately	Moderately	Occasionally	Moderately	Very often	Moderately	Moderately	Moderately	Occasionally	Yes	No	Yes	Yes	Yes	Yes	Yes	Yes	Yes	Yes	Graduate Student	Used code of silence (did not report)	Fear of being fired	Unfair and biased	187	36
1	Department Chair	Male	Mixed Race	36-45	Very often	Can't remember	Moderately	Occasionally	Very often	Very often	Moderately	Very often	Can't remember	Very often	Occasionally	Can't remember	Very often	Can't remember	Very often	No	No	No	No	Yes	No	No	No	No	No	Graduate Student	Sought support from colleagues/friends/family	Other
1	Group Leader	Male	White	46-55	Very often	Moderately	Occasionally	Moderately	Occasionally	Very often	Very often	Can't remember	Seldom	Can't remember	Can't remember	Can't remember	Occasionally	Can't remember	Can't remember	No	No	No	No	Yes	No	No	No	No	No	Graduate Student	Sought support from colleagues/friends/family	Fear of retaliation		185
1	Principal Investigator	Female	Middle Eastern	56-65	Can't remember	Can't remember	Can't remember	Seldom	Can't remember	Can't remember	Can't remember	Can't remember	Can't remember	Occasionally	Seldom	Can't remember		Can't remember	Very often	Yes	No	No	No	Yes	No	No	No	No	No	Postdoc	Used code of silence (did not report)	Fear of being fired	Other	185
1	Department Chair	Female	White	36-45	Occasionally	Seldom	Seldom	Occasionally	Moderately	Moderately	Seldom	Occasionally	Seldom	Seldom	Moderately	Can't remember	Seldom	Can't remember	Can't remember	Yes	No	No	No	No	Yes	No	No	Yes	No	Graduate Student	Reported to my institution/body responsible for your institution		Unfair and biased	169
1	Principal Investigator	Female	White	56-65	Seldom	Moderately	Occasionally	Seldom	Seldom	Very often	Moderately	Seldom	Seldom	Can't remember	Can't remember	Can't remember	Seldom	Moderately	Occasionally	No	No	No	No	No	No	No	No	No	No	Graduate Student	Sought support from colleagues/friends/family	Fear of retaliation		185
1	Department Chair	Male	White	56-65	Moderately	Very often	Occasionally	Occasionally	Can't remember	Occasionally	Moderately	Seldom	Can't remember	Seldom	Can't remember	Can't remember	Can't remember	Can't remember	Moderately	Yes	No	Yes	No	Yes	No	No	No	No	Yes	Graduate Student	Reported to my institution/body responsible for your institution	Fear of retaliation	Unfair and biased	169
1	Principal Investigator	Male	White	56-65	Moderately	Occasionally	Very often	Moderately	Occasionally	Very often	Very often	Moderately	Moderately	Seldom	Very often	Can't remember	Occasionally	Can't remember	Can't remember	Yes	No	No	No	No	No	Yes	No	No	No	Graduate Student	Reported to my institution/body responsible for your institution	Fear of retaliation	Unfair and biased	185
1	Principal Investigator	Female	White	46-55	Seldom	Seldom	Moderately	Occasionally	Very often	Very often	Occasionally	Seldom	Can't remember	Seldom	Moderately	Very often	Occasionally	Very often	Occasionally	No	No	Yes	Yes	Yes	Yes	Yes	No	Yes	Yes	Graduate Student	Reported to my institution/body responsible for your institution	Other	Unfair and biased	185
1	Department Chair	Female	White	25-35	Occasionally	Moderately	Seldom	Moderately	Can't remember	Can't remember	Occasionally	Can't remember	Occasionally	Can't remember	Can't remember	Can't remember	Seldom	Can't remember	Can't remember	No	No	No	No	No	No	No	No	No	No	Graduate Student	Sought support from colleagues/friends/family	Fear of retaliation		185
1	Principal Investigator	Male	White	46-55	Occasionally	Can't remember	Occasionally	Can't remember	Can't remember	Very often	Can't remember	Very often	Seldom	Seldom	Very often	Moderately	Very often	Moderately	Very often	Yes	No	No	Yes	Yes	No	No	No	No	Yes	Graduate Student	Used code of silence (did not report)	Fear of retaliation		187	5
1	Principal Investigator	Female	White	56-65	Occasionally	Very often	Seldom	Very often	Occasionally	Very often	Moderately	Occasionally	Moderately	Can't remember	Very often	Occasionally	Moderately	Very often	Very often	No	No	Yes	No	Yes	No	No	Yes	Yes	No	Graduate Student	Used code of silence (did not report)	Fear of retaliation	Other	185	53
1	Principal Investigator	Male	White	56-65	Occasionally	Occasionally	Can't remember	Moderately	Occasionally	Occasionally	Seldom	Seldom	Seldom	Very often	Occasionally	Can't remember	Moderately	Seldom	Seldom	No	Yes	No	Yes	No	No	Yes	No	Yes	Yes	Postdoc	Sought support from colleagues/friends/family	Visa issues	Other	9
1	Principal Investigator	Male	Mixed Race	36-45	Can't remember	Can't remember	Can't remember	Can't remember	Occasionally	Occasionally	Can't remember	Moderately	Can't remember	Can't remember	Occasionally	Can't remember	Occasionally	Can't remember	Moderately	No	No	No	Yes	No	No	Yes	No	No	Yes	Postdoc	Reported to my institution/body responsible for your institution		Unfair and biased	187	33
1	Group Leader	Male	White	46-55	Can't remember	Occasionally	Can't remember	Can't remember	Occasionally	Seldom	Seldom	Occasionally	Very often		Very often	Can't remember	Very often	Very often	Moderately	No	No	No	Yes	No	Yes	No	No	No	Yes	Postdoc	Used code of silence (did not report)	Fear of being fired	Unfair and biased	84
1	Group Leader	Male	White	46-55	Occasionally	Occasionally	Can't remember	Can't remember	Moderately	Moderately	Occasionally	Can't remember	Can't remember	Can't remember		Seldom	Occasionally	Occasionally	Occasionally	No	No	No	No	No	No	No	No	No	No	Other	Reported to my institution/body responsible for your institution		Other	185
1	Principal Investigator	Male	White	46-55	Moderately	Seldom	Moderately	Can't remember	Very often	Very often	Seldom	Very often	Can't remember	Moderately	Can't remember	Seldom	Can't remember	Seldom	Moderately	No	No	No	No	Yes	No	No	No	No	No	Graduate Student	Sought support from colleagues/friends/family	Fear of retaliation		185
1	Principal Investigator	Male	White	Over 66	Occasionally	Very often	Very often	Moderately	Very often	Very often	Can't remember	Very often	Seldom	Can't remember	Seldom	Occasionally	Moderately	Very often	Can't remember	Yes	No	No	Yes	Yes	No	Yes	No	No	Yes	Graduate Student	Used code of silence (did not report)	Fear of retaliation		185
1	Principal Investigator	Male	Middle Eastern	46-55	Occasionally	Can't remember	Seldom	Can't remember	Can't remember	Can't remember	Can't remember	Moderately	Can't remember	Can't remember	Very often	Occasionally	Can't remember	Very often	Occasionally	Yes	No	No	No	No	Yes	Yes	No	Yes	No	Graduate Student	Used code of silence (did not report)	Fear of retaliation		80
1	Department Chair	Male	White	46-55	Moderately	Occasionally	Moderately	Moderately	Can't remember	Occasionally	Very often	Moderately	Very often	Seldom	Can't remember	Can't remember	Can't remember	Very often	Seldom	No	No	No	No	No	No	No	No	No	No	Other	Sought support from colleagues/friends/family		Other	185
1	Principal Investigator	Male	Black or African American	56-65	Occasionally	Occasionally	Occasionally	Occasionally	Very often	Occasionally		Very often	Very often	Very often	Very often	Very often	Very often	Very often	Very often	Yes	No	Yes	Yes	Yes	Yes	Yes	No	No	Yes	Graduate Student	Used code of silence (did not report)	Fear of retaliation		187	24
1	Principal Investigator	Male	White	36-45	Occasionally	Very often	Very often	Seldom	Moderately	Very often	Very often	Seldom	Can't remember	Very often	Occasionally	Moderately	Very often	Seldom	Moderately	No	No	No	Yes	Yes	No	No	No	No	No	Graduate Student	Used code of silence (did not report)	Fear of retaliation		185
1	Department Chair	Male	White	56-65	Very often	Very often	Very often	Very often	Very often	Very often	Very often	Very often	Seldom	Occasionally	Very often	Occasionally	Very often	Very often	Very often	Yes	No	No	Yes	Yes	No	No	No	No	Yes	Other	Reported to my institution/body responsible for your institution		Unfair and biased	185
1	Department Chair	Female	White	36-45	Seldom	Seldom	Seldom	Occasionally	Moderately	Seldom	Seldom	Occasionally	Moderately	Can't remember	Seldom	Can't remember	Seldom	Seldom	Occasionally	No	No	No	No	No	Yes	Yes	No	No	No	Postdoc	Sought support from colleagues/friends/family	Fear of retaliation		187
1	Lab Supervisor	Male	East Indian	36-45	Can't remember	Can't remember	Moderately	Moderately	Very often	Can't remember	Moderately	Occasionally	Very often	Moderately	Very often	Can't remember	Moderately	Can't remember	Can't remember	No	No	Yes	No	No	No	No	No	No	No	Postdoc	Sought support from colleagues/friends/family	Fear of retaliation	Unfair and biased	185
1	Principal Investigator	Male	White	36-45	Occasionally	Moderately	Occasionally	Very often	Seldom	Moderately	Moderately	Occasionally	Can't remember	Seldom	Can't remember	Can't remember	Seldom	Can't remember	Can't remember	No	No	No	No	Yes	No	No	No	No	Yes	Graduate Student	Sought support from colleagues/friends/family	Fear of retaliation	Other	185
1	Group Leader	Male	Middle Eastern	46-55	Very often	Very often	Very often	Very often	Very often	Very often	Very often	Very often	Very often	Very often	Very often	Very often	Very often	Very often	Very often	No	No	Yes	No	Yes	No	Yes	Yes	No	No	Other	Other	Fear of retaliation	Unfair and biased
1	Principal Investigator	Male	Asian	36-45	Occasionally	Moderately	Seldom	Occasionally	Seldom	Very often	Occasionally	Seldom	Can't remember	Can't remember	Moderately	Can't remember	Moderately	Seldom	Can't remember	Yes	No	No	No	No	Yes	Yes	No	No	No	Graduate Student	Used code of silence (did not report)	Fear of being fired		185
1	Department Chair	Male	White	46-55	Seldom	Seldom	Occasionally	Can't remember	Can't remember	Moderately	Occasionally	Can't remember	Very often	Can't remember	Seldom	Can't remember	Occasionally	Can't remember	Can't remember	Yes	No	No	No	Yes	No	No	No	No	No	Other	Used code of silence (did not report)	Fear of retaliation	Other	187	44
1	Group Leader	Male	White	46-55	Occasionally	Very often	Occasionally	Occasionally	Occasionally	Moderately	Moderately	Seldom	Occasionally	Very often	Moderately	Very often	Moderately	Moderately	Moderately	Yes	No	Yes	Yes	Yes	Yes	Yes	No	No	Yes	Postdoc	Used code of silence (did not report)	Fear of retaliation		84
1	Principal Investigator	Male	White	36-45	Very often	Very often	Very often	Very often	Very often	Very often	Very often	Very often	Very often	Seldom	Very often	Very often	Very often	Very often	Very often	Yes	No	No	No	Yes	Yes	No	No	Yes	Yes	Graduate Student	Used code of silence (did not report)	Fear of retaliation		17
1	Principal Investigator	Female	White	46-55	Occasionally	Very often		Moderately	Seldom	Very often	Very often	Very often	Very often	Can't remember	Very often	Very often	Very often	Very often	Very often	Yes	No	No	No	No	Yes	Yes	No	No	No	Postdoc	Sought support from colleagues/friends/family	Fear of retaliation		187	22
1	Principal Investigator	Male	White	25-35	Moderately	Occasionally	Occasionally	Moderately	Can't remember	Seldom	Seldom	Seldom	Can't remember	Occasionally	Seldom	Very often	Moderately	Can't remember	Can't remember	No	No	No	No	Yes	No	No	No	No	No	Graduate Student	Used code of silence (did not report)	Other		185
1	Principal Investigator	Male	White	36-45	Moderately	Very often	Very often	Can't remember	Very often	Very often	Very often	Very often	Occasionally	Occasionally	Very often	Very often	Very often	Very often	Can't remember	No	No	Yes	No	Yes	Yes	No	No	No	Yes	Postdoc	Reported to my institution/body responsible for your institution		Unfair and biased
1	Principal Investigator	Female	White	46-55	Moderately	Very often	Occasionally	Very often	Seldom	Very often	Very often	Seldom	Moderately	Can't remember	Seldom	Can't remember	Seldom	Moderately	Seldom	Yes	No	No	Yes	No	No	No	No	No	Yes	Graduate Student	Sought support from colleagues/friends/family		Fair and unbiased	185
1	Department Chair	Female	White	36-45	Occasionally	Can't remember	Can't remember	Seldom	Seldom	Occasionally	Moderately	Can't remember	Can't remember	Can't remember	Can't remember	Can't remember	Can't remember	Can't remember	Can't remember	No	No	Yes	No	No	No	No	No	No	No	Undergraduate Student	Used code of silence (did not report)	Fear of retaliation	Other
1	Principal Investigator	Male	Middle Eastern	46-55	Very often	Moderately	Moderately	Moderately	Very often	Very often	Occasionally	Moderately	Moderately	Very often	Very often	Very often	Very often	Very often	Very often	Yes	Yes	Yes		Yes	Yes	Yes	Yes	Yes	Yes	Postdoc	Used code of silence (did not report)	Fear of retaliation		187	22
1	Principal Investigator	Male	White	36-45	Can't remember	Occasionally	Can't remember	Can't remember	Very often	Very often	Moderately	Very often	Very often	Occasionally	Occasionally	Can't remember	Seldom	Can't remember	Can't remember	Yes	No	Yes	No	Yes	No	Yes	No	No	Yes	Graduate Student	Reported to my institution/body responsible for your institution		Unfair and biased	185
1	Department Chair	Male	White	56-65	Occasionally	Occasionally	Can't remember	Seldom	Can't remember	Occasionally	Can't remember	Can't remember	Seldom	Can't remember	Occasionally	Can't remember	Can't remember	Seldom	Seldom	No	No	No	No	Yes	No	No	No	No	No	Other	Sought support from colleagues/friends/family	Fear of retaliation
1	Principal Investigator	Female	White	36-45	Occasionally	Moderately	Seldom	Moderately	Very often	Seldom	Seldom	Very often	Occasionally	Can't remember	Moderately	Seldom	Moderately	Seldom	Seldom	No	No	No	No	No	No	No	No	No	No	Graduate Student	Used code of silence (did not report)	Fear of being fired		185
1	Principal Investigator	Male	White	36-45	Seldom	Occasionally	Seldom	Very often	Moderately	Moderately	Moderately	Very often	Very often	Very often	Occasionally	Can't remember	Moderately	Very often	Very often	No	No	No	No	No	Yes	Yes	No	Yes	No	Postdoc	Reported to my institution/body responsible for your institution		Unfair and biased	187	7
1	Principal Investigator	Male	White	46-55	Very often	Moderately	Very often	Moderately	Occasionally	Very often	Moderately	Moderately	Occasionally	Moderately	Moderately	Seldom	Very often	Very often	Occasionally	Yes	Yes	Yes	Yes	Yes	Yes	Yes	No	No	Yes	Graduate Student	Reported to my institution/body responsible for your institution		Unfair and biased	31
1	Principal Investigator	Female	Middle Eastern	56-65	Moderately	Occasionally	Very often	Occasionally	Occasionally	Moderately	Moderately	Can't remember	Can't remember	Occasionally	Occasionally	Can't remember	Moderately	Occasionally	Can't remember	No	No	No	No	No	Yes	Yes	No	Yes	No	Graduate Student	Used code of silence (did not report)	Other		9
1	Department Chair	Other genders	White	56-65	Moderately	Moderately	Occasionally	Occasionally	Moderately	Very often	Very often	Very often	Very often	Occasionally	Very often	Occasionally	Very often	Very often	Very often	Yes	No	No	Yes	No	No	No	No	Yes	Yes	Other	Reported to my institution/body responsible for your institution	Other	Unfair and biased	185
1	Department Chair	Male	White	56-65	Can't remember	Can't remember	Can't remember	Occasionally	Can't remember	Occasionally	Occasionally	Occasionally	Occasionally	Can't remember	Can't remember	Can't remember	Occasionally	Occasionally	Occasionally	No	No	No	Yes	No	No	No	Yes	No	Yes	Other	Sought support from colleagues/friends/family	Fear of retaliation		31
1	Principal Investigator	Male	White	56-65	Very often		Very often	Very often	Very often	Very often	Very often	Seldom	Can't remember	Seldom	Seldom	Very often	Very often	Moderately	Seldom	Yes	No	No	Yes	No	Yes				Yes	Postdoc	Used code of silence (did not report)	Fear of retaliation	Unfair and biased	187	33
1	Principal Investigator	Male	White	46-55	Can't remember	Occasionally	Seldom	Occasionally	Can't remember	Very often	Occasionally	Very often	Occasionally	Seldom	Very often	Seldom	Moderately	Moderately	Occasionally	No	No	No	Yes	No	Yes	Yes	No	Yes	Yes	Graduate Student	Reported to my institution/body responsible for your institution	Other	Other	168	44
1	Principal Investigator	Female	Black or African American	36-45	Moderately	Can't remember	Moderately	Can't remember	Moderately	Very often	Moderately	Can't remember	Moderately	Can't remember	Can't remember	Can't remember	Can't remember	Can't remember	Moderately	Yes	No	No	Yes	Yes	No	No	No	No	Yes	Graduate Student	Used code of silence (did not report)	Fear of retaliation		187	5
1	Principal Investigator	Female	East Indian	46-55	Can't remember	Can't remember	Can't remember	Occasionally	Occasionally	Can't remember	Can't remember	Can't remember	Occasionally	Moderately	Moderately	Occasionally	Very often	Very often	Very often	Yes	No	Yes	No	No	Yes	Yes	No	Yes	No	Postdoc	Sought support from colleagues/friends/family	Fear of retaliation		187	22
1	Principal Investigator	Male	Asian	46-55	Occasionally	Occasionally	Very often	Moderately	Occasionally	Can't remember	Can't remember	Can't remember	Moderately	Moderately	Very often	Moderately	Very often	Moderately	Can't remember	No	No	Yes	No	No	No	No	No	No	No	Graduate Student	Used code of silence (did not report)	Fear of retaliation	Other	156
1	Principal Investigator	Female	White	36-45	Can't remember	Can't remember	Seldom	Moderately	Very often	Can't remember	Can't remember	Occasionally	Can't remember	Can't remember	Seldom	Seldom	Can't remember	Can't remember	Can't remember	No	No	Yes	Yes	No	No	No	No	No	Yes	Graduate Student	Sought support from colleagues/friends/family	Fear of being fired		31
1	Principal Investigator	Male	White	46-55	Very often	Very often	Very often	Very often	Very often	Very often	Very often	Very often	Very often	Very often	Very often	Very often	Very often	Very often	Very often	Yes	No	Yes	No	Yes	No	No	No	No	Yes	Graduate Student	Reported to my institution/body responsible for your institution	Fear of retaliation	Unfair and biased	185
1	Group Leader	Female	White	46-55	Can't remember	Can't remember	Can't remember	Can't remember	Occasionally	Moderately	Can't remember	Moderately	Moderately	Occasionally	Very often	Can't remember	Occasionally	Very often	Very often	No	No	No	No	No	No	Yes	No	Yes	No	Postdoc	Sought support from colleagues/friends/family	Fear of retaliation
1	Principal Investigator	Male	Middle Eastern	Over 66	Can't remember	Occasionally	Occasionally	Occasionally	Very often	Very often	Occasionally	Can't remember	Very often	Occasionally	Can't remember	Very often	Very often	Occasionally	Can't remember	Yes	No	Yes	Yes	Yes	Yes	Yes	No	No	Yes	Graduate Student	Used code of silence (did not report)	Fear of retaliation	Other	187	7
1	Department Chair	Male	White	46-55	Can't remember	Occasionally	Can't remember	Can't remember	Occasionally	Occasionally	Can't remember	Can't remember	Moderately	Can't remember	Can't remember	Can't remember	Moderately	Can't remember	Can't remember	No	No	No	No	No	No	No	No	No	Yes	Graduate Student	Sought support from colleagues/friends/family	Fear of retaliation		185
1	Principal Investigator	Female	White	46-55	Seldom	Moderately	Moderately	Moderately	Moderately	Occasionally	Can't remember	Moderately	Moderately	Can't remember	Moderately	Can't remember	Very often	Very often	Moderately	No	No	No	Yes	No	No	No	No	No	Yes	Graduate Student	Reported to my institution/body responsible for your institution	Other	Fair and unbiased	187	45
1	Group Leader	Female	White0	46-55	Very often	Can't remember	Can't remember	Can't remember	Occasionally	Moderately	Occasionally	Very often	Very often	Very often	Very often	Moderately	Very often	Moderately	Very often	Yes	No	No	Yes	Yes	Yes	Yes	Yes	Yes	Yes	Other	Reported to my institution/body responsible for your institution	Other	Fair and unbiased
1	Principal Investigator
1	Group Leader
1	Principal Investigator
1	Department Chair	Male	White	46-55	Moderately	Occasionally	Very often	Moderately	Can't remember	Occasionally	Moderately	Can't remember	Occasionally	Occasionally	Occasionally	Moderately	Very often	Occasionally	Occasionally	Yes	No	No	Yes	Yes	No	No	No	No	No	Other	Reported to my institution/body responsible for your institution		Unfair and biased	31
1	Principal Investigator	Female	White	56-65	Seldom	Moderately	Moderately	Very often	Moderately	Occasionally	Moderately	Can't remember	Very often	Can't remember	Very often	Can't remember	Very often	Very often	Very often	Yes	No	Yes	Yes	Yes	Yes	Yes	No	Yes	Yes	Visiting Scientist/Researcher	Reported to my institution/body responsible for your institution	Fear of being fired	Unfair and biased
1	Department Chair
1	Principal Investigator
1	Group Leader
1	Principal Investigator	Male	Asian	36-45	Can't remember		Seldom		Moderately		Can't remember		Moderately		Can't remember		Moderately		Very often	No	No	Yes	No	No	No	No	No	No	No	Graduate Student	Used code of silence (did not report)	Fear of being fired	Other
1	Principal Investigator
1	Principal Investigator	Male	White	36-45	Occasionally	Occasionally	Seldom	Moderately	Occasionally	Moderately	Moderately	Moderately	Can't remember	Can't remember	Can't remember	Very often	Very often	Very often	Can't remember	No	No	No	No	No	Yes	No	No	No	No	Postdoc	Sought support from colleagues/friends/family	Fear of retaliation	Other	31	53
1	Principal Investigator	Female	Asian	56-65	Seldom	Moderately	Can't remember	Can't remember	Occasionally	Moderately	Very often	Very often	Very often	Seldom	Very often	Can't remember	Seldom	Can't remember	Can't remember	No	No	Yes	Yes	Yes	No	No	No	Yes	Yes	Other	Sought support from colleagues/friends/family	Fear of being fired		80
1	Group Leader	Male	White	56-65	Occasionally	Seldom	Can't remember	Can't remember	Seldom	Moderately	Moderately	Occasionally	Occasionally	Seldom	Moderately	Moderately	Occasionally	Seldom	Moderately	Yes	No	No	No	Yes	Yes	Yes	No	Yes	Yes	Other	Sought support from colleagues/friends/family	Fear of retaliation	Other
1	Group Leader
1	Department Chair
1	Principal Investigator
1	Principal Investigator	Female	White	46-55	Seldom	Can't remember	Can't remember	Can't remember	Seldom	Occasionally	Occasionally	Can't remember	Can't remember	Can't remember	Can't remember	Can't remember	Can't remember	Can't remember	Can't remember	No	No	No	No	No	No	No	No	No	No	Postdoc	Used code of silence (did not report)	Other
1
1	Principal Investigator
1
1	Department Chair	Male	East Indian	46-55	Moderately	Moderately	Moderately	Moderately	Occasionally	Moderately	Very often	Moderately	Moderately	Moderately	Moderately	Moderately	Moderately	Moderately	Moderately	No	No	No	No	No	No	No	No	No	No	Other
1	Group Leader	Male	White	36-45	Seldom	Occasionally	Can't remember	Can't remember	Occasionally	Moderately	Moderately	Moderately	Seldom	Can't remember	Can't remember	Occasionally	Can't remember	Can't remember	Seldom	No	No	No	No	No	No	No	No	No	No	Other	Sought support from colleagues/friends/family	Fear of retaliation
1	Department Chair
1	Principal Investigator	Male	Middle Eastern	46-55	Moderately	Very often	Moderately	Very often	Very often	Very often	Very often	Very often	Very often	Very often	Very often	Moderately	Very often	Very often	Very often	Yes	Yes	No	No	Yes	Yes	Yes	Yes	Yes	Yes	Postdoc	Used code of silence (did not report)	Visa issues		187	22
1	Department Chair
1	Department Chair
1	Department Chair
1	Department Chair
1	Principal Investigator	Female	White	56-65	Seldom	Very often	Can't remember	Can't remember	Occasionally	Moderately	Occasionally	Moderately	Moderately	Can't remember	Seldom	Can't remember	Moderately	Occasionally	Seldom	Yes	No	Yes	No	No	No	No	No	No	No	Graduate Student	Sought support from colleagues/friends/family	Fear of retaliation
1
1	Principal Investigator	Male	Middle Eastern	36-45	Moderately	Moderately	Occasionally	Moderately	Very often	Seldom	Seldom	Seldom	Seldom	Seldom	Very often	Occasionally	Moderately	Seldom	Seldom	No	No	No	Yes	No	Yes	Yes	No	No	Yes	Visiting Scientist/Researcher	Used code of silence (did not report)	Other
1	Principal Investigator
1	Principal Investigator	Male	Middle Eastern	36-45	Occasionally	Occasionally	Seldom	Seldom	Occasionally	Seldom	Seldom	Seldom	Seldom	Occasionally	Occasionally	Occasionally	Occasionally	Very often	Very often	No	No	Yes	No	No	No	No	No	No	No	Graduate Student	Used code of silence (did not report)	Fear of retaliation	Other
1	Principal Investigator
1	Principal Investigator
1	Principal Investigator	Male	Middle Eastern	36-45	Very often	Very often	Very often	Very often	Very often	Very often	Moderately	Very often	Very often	Very often	Very often	Occasionally	Very often	Very often	Very often	Yes	Yes	Yes	Yes	Yes	Yes	Yes	No	Yes	Yes	Graduate Student	Reported to my institution/body responsible for your institution		Unfair and biased
1	Principal Investigator	Female	White	36-45	Very often	Occasionally	Occasionally	Seldom	Occasionally	Seldom	Can't remember	Can't remember	Can't remember	Seldom	Seldom	Can't remember	Can't remember	Can't remember	Can't remember	Yes	No	Yes	No	No	No	No	No	No	No	Graduate Student	Used code of silence (did not report)	Fear of retaliation
1	Department Chair	Prefer not to specify	East Indian	36-45
1	Principal Investigator	Male	White	36-45	Can't remember															Yes		Yes	Yes			Yes				Graduate Student	Sought support from colleagues/friends/family	Fear of being fired
1	Group Leader
1	Principal Investigator
1
1	Principal Investigator	Male	White	46-55	Occasionally	Moderately	Occasionally	Occasionally	Very often	Occasionally	Moderately	Occasionally	Occasionally	Can't remember	Moderately	Can't remember	Very often	Occasionally	Can't remember	No	No	Yes	No	No	Yes	Yes	No	No	No	Postdoc	Sought support from colleagues/friends/family	Other		65
1	Principal Investigator
1	Principal Investigator
1	Department Chair
1	Group Leader
1	Principal Investigator	Female	White	36-45	Very often	Moderately	Can't remember	Can't remember	Very often	Very often	Very often	Can't remember	Very often	Can't remember	Moderately	Can't remember	Moderately	Very often	Can't remember	Yes	No	No	Yes	No	No	Yes	No	No	Yes	Postdoc	Reported to my institution/body responsible for your institution	Other	Other	169
1	Principal Investigator
1	Department Chair	Male	White	56-65	Can't remember	Occasionally	Seldom	Can't remember	Occasionally	Occasionally	Occasionally	Moderately	Moderately	Moderately	Moderately	Can't remember	Moderately	Moderately	Moderately	Yes	No	No	No	Yes	No	No	No	No	No	Other	Reported to my institution/body responsible for your institution		Unfair and biased	185
1	Department Chair
1	Lab Supervisor	Male	East Indian	36-45	Occasionally	Very often	Occasionally	Very often	Very often	Very often	Very often	Very often	Seldom	Very often	Very often	Can't remember	Very often	Very often	Very often	No	Yes	Yes	Yes	No	Yes	No	No	No	Yes	Graduate Student	Used code of silence (did not report)	Visa issues	Unfair and biased	187	39
1	Principal Investigator	Male	White	Over 66				Very often	Very often	Moderately	Moderately					Moderately				No	No	No	Yes	No	No	No	No	No	Yes	Graduate Student	Used code of silence (did not report)	Visa issues	Unfair and biased	187	45
1	Department Chair
1	Principal Investigator
1	Principal Investigator	Male	White	56-65	Very often	Very often	Very often	Very often	Very often	Occasionally	Very often	Moderately	Moderately	Occasionally	Moderately	Occasionally	Very often	Seldom	Seldom	No	No	Yes	Yes	No	No	Yes	No	Yes	Yes	Graduate Student	Reported to my institution/body responsible for your institution		Unfair and biased	187	22
1	Principal Investigator	Male	White	56-65	Very often	Seldom	Very often	Can't remember	Very often	Very often	Very often	Can't remember	Very often	Very often	Can't remember	Seldom	Moderately	Seldom	Can't remember	No	No	No	Yes	Yes	No	No	No	No	Yes	Graduate Student	Used code of silence (did not report)	Fear of being fired		187	21
1	Principal Investigator	Female	White	36-45	Moderately	Moderately	Very often	Moderately	Very often	Moderately	Moderately	Occasionally	Seldom	Moderately	Very often	Very often	Moderately	Occasionally	Occasionally	Yes	No	No	Yes	Yes	Yes	Yes	No	No	Yes	Graduate Student	Reported to my institution/body responsible for your institution		Unfair and biased	187	22
1	Group Leader	Male	White	56-65	Occasionally	Moderately	Occasionally	Very often	Seldom	Very often	Moderately	Moderately	Can't remember	Occasionally	Very often	Occasionally	Very often	Very often	Very often	Yes	No	No	Yes	Yes	No	No	Yes	No	Yes	Other	Reported to my institution/body responsible for your institution		Unfair and biased
1	Principal Investigator
1	Principal Investigator	Male	White	56-65	Occasionally									Occasionally								Yes		Yes	Yes	Yes			Yes	Visiting Scientist/Researcher	Other		Unfair and biased
1	Principal Investigator
1
1	Department Chair
1	Principal Investigator	Female	Mixed Race	46-55	Occasionally	Seldom	Seldom	Can't remember	Moderately	Seldom	Seldom	Moderately	Can't remember	Can't remember	Moderately	Seldom	Seldom	Occasionally	Occasionally						Yes				Yes	Postdoc	Used code of silence (did not report)	Fear of retaliation
1	Department Chair
1	Principal Investigator
1	Department Chair
1	Principal Investigator
1	Principal Investigator	Female	White	46-55	Very often	Very often	Very often	Very often	Very often		Very often		Can't remember		Very often		Very often	Can't remember	Can't remember	Yes	No	No	No	Yes	No	No	No	No	No	Graduate Student	Sought support from colleagues/friends/family	Other	Unfair and biased	161
1
1	Principal Investigator	Male	White	56-65	Seldom	Seldom	Moderately	Seldom	Seldom	Moderately	Seldom	Seldom	Seldom	Seldom	Moderately	Seldom	Occasionally	Moderately	Seldom	Yes	No	No	Yes	Yes	No	No	No	No	Yes	Postdoc	Other	Other	Other	9
1	Principal Investigator	Female	White	36-45	Very often	Very often	Very often	Very often	Moderately	Very often	Moderately	Seldom	Very often	Very often	Very often	Occasionally	Very often	Occasionally	Very often	No	Yes	Yes	Yes	Yes	Yes	Yes	Yes	Yes	Yes	Postdoc	Used code of silence (did not report)	Fear of being fired	Unfair and biased
1	Principal Investigator	Male	Asian	36-45	Occasionally	Can't remember	Seldom	Can't remember	Seldom	Can't remember	Occasionally	Occasionally	Can't remember	Can't remember	Can't remember	Seldom	Can't remember	Very often	Seldom	No	No	No	Yes	No	No	No	No	No	No	Graduate Student	Sought support from colleagues/friends/family	Other		187	21
1	Principal Investigator	Male	White	56-65	Occasionally	Very often	Seldom	Moderately	Occasionally	Very often	Moderately	Moderately	Very often	Seldom	Occasionally	Seldom	Moderately	Seldom	Can't remember	Yes	No	No	Yes	No	No	No	Yes	No	Yes	Graduate Student	Used code of silence (did not report)	Fear of retaliation		10
1	Group Leader	Male	White	36-45	Moderately	Moderately	Occasionally	Occasionally	Seldom	Moderately	Occasionally	Seldom	Very often	Very often	Very often	Very often	Very often	Very often	Very often	Yes	No	No	Yes	Yes	Yes	Yes	Yes	Yes	Yes	Postdoc	Sought support from colleagues/friends/family
1	Principal Investigator	Male	White	46-55	Occasionally	Occasionally	Moderately	Moderately	Occasionally	Moderately	Moderately	Moderately	Moderately	Moderately	Very often	Seldom	Moderately	Moderately	Moderately	No	No	No	No	No	Yes	Yes	No	No	Yes	Postdoc	Reported to my institution/body responsible for your institution	Other	Unfair and biased	168
1
1	Principal Investigator	Male	Middle Eastern	56-65	Moderately	Moderately	Occasionally	Can't remember	Occasionally	Seldom	Moderately	Seldom	Very often	Can't remember	Very often	Can't remember	Very often	Seldom	Seldom	Yes	No	No	No	No	No	No	No	Yes	Yes	Graduate Student	Sought support from colleagues/friends/family	Fear of retaliation		80
1	Department Chair	Male	Asian	56-65	Occasionally	Occasionally	Occasionally	Occasionally	Can't remember	Occasionally	Occasionally	Can't remember	Can't remember		Occasionally	Can't remember	Very often	Can't remember	Can't remember	Yes				Yes						Other	Used code of silence (did not report)	Other	Unfair and biased
1	Principal Investigator	Male	Middle Eastern	46-55	Very often	Very often	Very often	Moderately	Moderately	Can't remember	Occasionally	Seldom	Very often	Can't remember	Very often	Very often	Very often	Very often	Seldom	No	Yes	Yes	Yes	No	Yes	Yes	No	Yes	Yes	Visiting Scientist/Researcher	Reported to my institution/body responsible for your institution	Visa issues	Unfair and biased	187	42
1
1	Principal Investigator
1	Group Leader	Male	White	36-45	Moderately	Moderately	Moderately	Moderately	Occasionally	Occasionally	Occasionally	Seldom	Very often	Very often	Very often	Moderately	Very often	Very often	Very often	Yes	No	Yes	No	Yes	Yes	Yes	No	Yes	Yes	Graduate Student	Used code of silence (did not report)	Fear of retaliation	Unfair and biased	17
1	Principal Investigator
1	Principal Investigator
1
1	Principal Investigator
1	Department Chair
1	Principal Investigator	Male	Middle Eastern	46-55	Can't remember	Can't remember	Can't remember	Can't remember	Seldom	Can't remember	Can't remember	Can't remember	Can't remember	Can't remember	Can't remember	Can't remember	Occasionally	Very often	Moderately	No	No	No	No	No	No	Yes	Yes	No	No	Postdoc	Used code of silence (did not report)	Fear of retaliation	Unfair and biased	187	22
1	Group Leader
1	Principal Investigator
1
1	Group Leader
1	Group Leader
1	Principal Investigator
1	Group Leader
1	Principal Investigator
1	Principal Investigator
1	Department Chair
1
1	Principal Investigator	Male	Asian	56-65	Very often	Very often	Very often	Very often	Very often	Very often	Very often	Very often	Very often	Very often	Very often	Very often	Very often	Very often	Very often	Yes	Yes	Yes	Yes	Yes	Yes	Yes	Yes	Yes	Yes	Postdoc	Reported to my institution/body responsible for your institution	Fear of being fired	Fair and unbiased
1	Lab Supervisor
1
1	Department Chair
1	Principal Investigator
1	Principal Investigator	Male	Asian	46-55	Moderately	Very often	Seldom	Moderately	Very often	Occasionally	Occasionally	Very often	Can't remember	Seldom	Moderately	Occasionally	Moderately	Very often	Very often	Yes	No	No	Yes	No	Yes	No	No	No	Yes	Graduate Student	Used code of silence (did not report)	Fear of retaliation
1	Principal Investigator	Female	Hispanic	56-65	Very often	Very often	Very often	Moderately	Very often	Very often	Very often	Very often	Very often	Occasionally	Very often	Occasionally	Very often	Very often	Seldom	Yes	No	No	Yes	Yes	Yes	No	No	No	No	Other	Reported to my institution/body responsible for your institution		Unfair and biased
1	Lab Supervisor
1	Principal Investigator
1
1	Principal Investigator
1	Department Chair
1	Principal Investigator	Male	White	36-45	Very often	Moderately	Moderately	Moderately	Moderately	Moderately	Moderately	Moderately	Moderately	Can't remember	Occasionally	Moderately	Occasionally	Occasionally	Occasionally	No	No	No	Yes	No	Yes	Yes	Yes	Yes	Yes	Postdoc	Used code of silence (did not report)	Fear of retaliation
1	Principal Investigator
1
1	Department Chair
1	Principal Investigator	Male	White	46-55	Can't remember	Can't remember	Can't remember	Seldom	Can't remember	Moderately	Occasionally	Can't remember	Can't remember	Seldom	Occasionally	Can't remember	Seldom	Can't remember	Occasionally	Yes	No	No	No	No	No	No	No	No	No	Graduate Student	Used code of silence (did not report)	Other		122
1	Principal Investigator
1	Group Leader	Male	Middle Eastern	36-45	Occasionally	Occasionally	Occasionally	Can't remember	Can't remember	Occasionally	Occasionally	Seldom	Can't remember	Can't remember	Occasionally	Occasionally	Occasionally	Occasionally	Occasionally	No	No	No	No	No	No	No	No	No	No	Undergraduate Student	Sought support from colleagues/friends/family	Other	Fair and unbiased	80
1	Department Chair
1	Group Leader	Male	White	36-45	Can't remember	Seldom	Occasionally	Occasionally	Occasionally	Occasionally	Can't remember	Can't remember	Can't remember	Seldom	Seldom	Seldom	Seldom	Can't remember	Occasionally	Yes	No	No	Yes	Yes	No	No	No	No	Yes	Other	Used code of silence (did not report)	Fear of being fired		80
1	Principal Investigator	Female	Asian	Over 66	Very often	Very often	Very often	Very often	Very often	Very often	Very often	Very often	Very often	Moderately	Very often	Can't remember	Very often	Occasionally	Occasionally	No	No	Yes	Yes	Yes	Yes	Yes	No	No	No	Postdoc	Used code of silence (did not report)	Fear of retaliation	Other	187	22
1	Department Chair
1	Principal Investigator
1	Group Leader	Male	White	36-45	Occasionally	Seldom	Very often	Occasionally	Moderately	Very often	Very often	Seldom	Occasionally	Moderately	Very often	Seldom	Very often	Very often	Very often	Yes	No	No	No	Yes	No	Yes	No	No	No	Visiting Scientist/Researcher	Sought support from colleagues/friends/family		Unfair and biased	187	22
1	Principal Investigator
1	Principal Investigator	Male	White	46-55	Seldom			Seldom		Occasionally		Seldom		Seldom		Seldom		Moderately	Moderately	No	No	No	Yes	No	No	Yes	No	No	No	Postdoc	Used code of silence (did not report)	Fear of retaliation	Unfair and biased
1	Department Chair	Female	Asian	25-35	Very often	Very often	Very often	Very often	Very often	Very often	Very often	Very often	Very often	Seldom	Very often	Very often	Very often	Can't remember	Very often	No	Yes	No	No	Yes	No	Yes	No	No	Yes	Visiting Scientist/Researcher	Reported to my institution/body responsible for your institution	Other	Unfair and biased	187	38
1	Department Chair
1	Department Chair	Male	Mixed Race	46-55	Seldom	Seldom	Seldom	Can't remember	Can't remember	Can't remember	Seldom	Can't remember	Seldom	Can't remember	Seldom	Can't remember	Seldom	Can't remember	Seldom	Yes	No	No	No	No	No	No	No	No	No	Undergraduate Student	Used code of silence (did not report)	Fear of retaliation	Fair and unbiased	187	5
1	Group Leader	Male	Middle Eastern	56-65	Seldom		Can't remember	Very often	Very often	Can't remember	Very often	Very often					Moderately	Very often	Very often	Yes	No	No		No	No	No	Yes	No	Yes	Graduate Student	Used code of silence (did not report)	Fear of retaliation
1	Department Chair	Male	Asian	Over 66	Can't remember	Seldom	Occasionally	Very often	Very often	Very often	Very often	Very often	Very often	Very often	Very often	Very often	Very often	Very often	Very often	Yes	No	Yes	Yes	Yes	Yes	No	Yes	Yes	Yes	Undergraduate Student	Used code of silence (did not report)	Fear of being fired	Unfair and biased	78	53
1	Principal Investigator	Female	White	46-55	Can't remember	Occasionally	Can't remember	Can't remember	Moderately	Very often	Can't remember	Seldom	Can't remember	Can't remember	Can't remember	Can't remember	Seldom	Occasionally	Seldom	No	No	No	Yes	No	No	No	No	No	No	Graduate Student	Sought support from colleagues/friends/family	Fear of retaliation	Other
1	Principal Investigator	Male	White0	36-45																Yes		Yes	Yes							Graduate Student	Other
1	Principal Investigator	Female	White	56-65	Can't remember	Very often	Can't remember	Can't remember	Very often	Very often	Can't remember	Moderately	Can't remember	Can't remember	Seldom	Can't remember	Very often	Moderately	Very often	No	No	No	Yes	No	No	No	No	No	Yes	Postdoc	Reported to my institution/body responsible for your institution		Fair and unbiased	187	14
1
1	Group Leader
1	Principal Investigator	Male	White0	46-55	Very often	Very often	Very often	Very often	Very often	Very often	Very often	Very often	Very often	Very often	Seldom	Very often	Moderately	Very often	Very often	Yes	Yes	Yes	Yes	Yes	Yes	Yes	Yes	Yes	Yes	Other	Used code of silence (did not report)	Fear of retaliation
1	Principal Investigator
1	Principal Investigator	Female	White	46-55	Occasionally	Occasionally	Seldom	Seldom	Very often	Occasionally	Occasionally	Moderately	Seldom	Can't remember	Seldom	Seldom	Can't remember	Occasionally	Seldom	Yes	No	No	Yes	Yes	No	No	No	No	No	Graduate Student	Sought support from colleagues/friends/family	Fear of retaliation
1	Principal Investigator
1	Principal Investigator	Female	White	46-55	Very often	Moderately	Moderately	Moderately	Moderately	Moderately	Moderately	Very often	Can't remember	Can't remember	Seldom	Moderately	Seldom	Moderately	Can't remember	No	No	No	Yes	No	No	No	No	No	No	Graduate Student	Used code of silence (did not report)	Fear of retaliation		31
1	Principal Investigator
1	Department Chair	Male	Asian	56-65	Very often	Can't remember	Occasionally	Very often	Occasionally	Very often	Can't remember	Very often	Very often	Very often	Very often	Very often	Very often	Very often	Very often	Yes	No	No	Yes	Yes	Yes	Yes	No	Yes	Yes	Graduate Student	Sought support from colleagues/friends/family	Other	Unfair and biased	75
1	Principal Investigator	Female	White	46-55	Can't remember	Occasionally	Can't remember	Seldom	Moderately	Can't remember	Can't remember	Seldom	Can't remember	Can't remember	Moderately	Moderately	Moderately	Seldom	Moderately	No	No	Yes	Yes	No	Yes	No	No	No	Yes	Postdoc	Used code of silence (did not report)	Visa issues	Unfair and biased	187	5
1	Department Chair	Male	White	36-45			Moderately			Moderately			Moderately		Moderately	Moderately	Moderately							Yes				Yes		Other	Reported to my institution/body responsible for your institution		Unfair and biased	185
1	Department Chair	Male	White	46-55	Seldom	Moderately	Moderately	Moderately	Occasionally	Very often	Seldom	Occasionally	Very often	Seldom	Very often	Seldom	Very often	Very often	Very often	Yes	No	No	Yes	Yes	No	No	No	No	Yes	Other	Sought support from colleagues/friends/family	Fear of retaliation		9
1	Department Chair	Male	White	36-45	Moderately	Moderately	Very often	Seldom	Seldom	Moderately	Very often	Seldom	Seldom	Seldom	Can't remember	Can't remember	Seldom	Can't remember	Can't remember	No	No	No	No	Yes	No	No	No	No	No	Other	Sought support from colleagues/friends/family	Other	Other	31	53
1	Department Chair	Female	White	46-55	Moderately	Occasionally	Can't remember	Seldom	Can't remember	Moderately	Occasionally	Seldom	Moderately	Can't remember	Occasionally	Occasionally	Occasionally	Moderately	Moderately	Yes	No	No	Yes	Yes	No	No	No	No	No	Other	Sought support from colleagues/friends/family	Fear of retaliation		187	5
1	Group Leader	Male	White	36-45	Very often	Can't remember	Very often	Very often	Can't remember	Very often	Very often	Very often	Very often	Very often	Very often	Can't remember	Can't remember	Very often	Very often	No	No	No	No	Yes	No	Yes	No	Yes	No	Postdoc	Sought support from colleagues/friends/family	Fear of retaliation	Unfair and biased	9
1	Principal Investigator	Male	Middle Eastern	36-45	Very often	Very often	Moderately	Seldom	Occasionally	Occasionally	Very often	Very often	Very often	Very often	Very often	Can't remember	Very often	Moderately	Moderately	Yes	Yes	Yes	Yes	Yes	Yes	Yes	Yes	Yes	Yes	Visiting Scientist/Researcher	Used code of silence (did not report)	Visa issues	Unfair and biased	187	22
1	Group Leader	Male	White	56-65	Can't remember	Can't remember	Seldom	Moderately	Can't remember	Very often	Can't remember	Can't remember	Very often	Seldom	Very often	Very often	Very often	Very often	Very often	Yes	No	No	Yes	Yes	No	No	No	No	No	Visiting Scientist/Researcher	Used code of silence (did not report)	Fear of retaliation	Unfair and biased	122
1	Group Leader
1	Lab Supervisor	Male	White	36-45	Very often	Seldom	Very often	Seldom	Moderately	Occasionally	Seldom	Can't remember	Can't remember	Very often	Occasionally	Moderately	Very often	Moderately	Very often	No	No	No	No	No	No	No	No	No	No	Graduate Student	Sought support from colleagues/friends/family	Fear of retaliation
1	Principal Investigator	Male	White	56-65	Very often	Occasionally	Very often	Moderately	Can't remember	Very often	Moderately	Can't remember	Seldom	Can't remember	Very often	Very often	Very often	Very often	Very often	Yes	No	No	Yes	Yes	No	No	No	No	No	Other	Reported to my institution/body responsible for your institution		Unfair and biased	31
1	Principal Investigator	Male	Asian	56-65	Can't remember	Occasionally	Can't remember	Can't remember	Can't remember	Can't remember	Can't remember	Can't remember	Can't remember	Can't remember	Occasionally	Can't remember	Occasionally	Occasionally	Occasionally	No	No	No	No	No	Yes	No	No	No	No	Postdoc	Sought support from colleagues/friends/family	Other	Fair and unbiased	187	5
1	Principal Investigator	Female	White	36-45	Can't remember	Can't remember	Can't remember	Can't remember	Seldom	Occasionally	Moderately	Can't remember	Moderately	Can't remember	Moderately	Occasionally	Very often	Occasionally	Occasionally	Yes	No	No	No	No	Yes	No	No	No	No	Postdoc	Sought support from colleagues/friends/family		Unfair and biased	185
1	Principal Investigator	Female	East Indian	36-45	Occasionally	Seldom	Occasionally	Can't remember	Moderately	Seldom	Occasionally	Moderately	Moderately	Can't remember	Moderately	Seldom	Moderately	Moderately	Very often	No	No	No	No	No	No	No	No	Yes	No	Graduate Student	Sought support from colleagues/friends/family	Fear of being fired		187	22
1	Principal Investigator	Male	White	46-55	Moderately	Can't remember	Very often	Moderately	Very often	Very often	Very often	Very often	Very often	Very often	Can't remember	Can't remember	Can't remember	Can't remember	Very often	No	No	No	No	Yes	No	No	No	No	No	Other	Reported to my institution/body responsible for your institution		Unfair and biased
1	Principal Investigator	Female	Middle Eastern	56-65	Very often	Very often	Occasionally	Can't remember	Moderately	Occasionally	Very often	Occasionally	Can't remember	Very often	Moderately	Moderately	Very often	Very often	Very often	Yes	No	Yes	No	Yes	Yes	Yes	No	Yes	No	Postdoc	Used code of silence (did not report)	Fear of retaliation	Unfair and biased	187	39
1	Principal Investigator	Male	White	56-65	Can't remember	Occasionally	Occasionally	Can't remember	Seldom	Can't remember	Can't remember	Seldom	Can't remember	Can't remember	Can't remember	Seldom	Can't remember	Can't remember	Can't remember	No	No	Yes	No	No	No	No	No	No	No	Graduate Student	Sought support from colleagues/friends/family	Fear of retaliation
1	Principal Investigator	Male	Asian	36-45	Very often	Very often	Very often	Very often	Very often	Very often	Moderately	Moderately	Occasionally	Seldom	Very often	Very often	Very often	Very often	Very often	Yes	Yes	No	Yes	No	Yes	Yes	No	No	Yes	Postdoc	Sought support from colleagues/friends/family	Fear of retaliation	Other	187	22
1	Principal Investigator	Female	Asian	36-45	Moderately	Seldom	Occasionally	Can't remember	Seldom	Occasionally	Seldom	Can't remember	Can't remember	Moderately	Moderately	Occasionally	Very often	Moderately	Occasionally	No	No	No	No	No	Yes	No	No	No	No	Postdoc	Sought support from colleagues/friends/family	Visa issues	Other	187	22
1	Lab Supervisor	Male	Asian	56-65	Moderately	Moderately	Can't remember	Can't remember	Seldom	Moderately	Moderately	Moderately	Moderately	Moderately	Very often	Can't remember	Very often	Moderately	Very often	Yes	No	No	Yes	Yes	No	No	No	No	No	Other	Reported to my institution/body responsible for your institution		Other	187	26
1	Principal Investigator
1	Principal Investigator
1	Principal Investigator
1	Principal Investigator
1
1	Group Leader
1	Lab Supervisor	Male	White	36-45	Occasionally	Can't remember	Can't remember	Moderately	Seldom	Seldom	Occasionally	Moderately	Very often	Occasionally	Moderately	Occasionally	Occasionally	Moderately	Moderately	Yes	No	Yes	No	No	Yes	No	No	No	No	Graduate Student	Sought support from colleagues/friends/family	Fear of being fired	Unfair and biased
1	Department Chair
1
1	Department Chair
1	Department Chair
1	Department Chair
1	Principal Investigator
1	Principal Investigator	Male	Middle Eastern	46-55	Occasionally	Occasionally	Seldom	Occasionally	Very often	Moderately	Moderately	Moderately	Moderately	Seldom	Seldom	Very often	Moderately	Moderately	Moderately	No	Yes	Yes	Yes	Yes	Yes	Yes	No	Yes	Yes	Visiting Scientist/Researcher	Sought support from colleagues/friends/family	Fear of being fired	Other
1	Lab Supervisor
1
1	Principal Investigator	Male	White	46-55	Seldom	Seldom	Seldom	Seldom	Moderately	Very often	Moderately	Seldom	Seldom	Seldom	Seldom	Moderately	Seldom	Very often	Seldom	No	No	Yes	Yes	No	No	No	No	No	Yes	Graduate Student	Reported to my institution/body responsible for your institution	Fear of being fired	Fair and unbiased	31
1	Principal Investigator	Male	Hispanic	36-45	Can't remember	Seldom	Occasionally	Moderately	Very often	Occasionally	Seldom	Moderately	Occasionally	Moderately	Seldom	Occasionally	Moderately	Moderately	Occasionally	Yes	No	Yes	Yes	No	No	Yes	No	No	No	Graduate Student	Reported to my institution/body responsible for your institution		Other	187	5
1
1	Principal Investigator	Female	White	46-55																Yes	No			Yes			Yes		Yes	Other	Used code of silence (did not report)	Fear of being fired
1	Department Chair
1	Principal Investigator	Female	Asian	36-45	Seldom	Moderately	Seldom	Seldom	Very often	Seldom	Seldom	Occasionally	Seldom	Can't remember	Can't remember	Seldom	Seldom	Seldom	Occasionally	No	No	No	No	No	No	No	No	No	No	Graduate Student	Sought support from colleagues/friends/family	Fear of retaliation		187	33
1	Principal Investigator	Male	White	36-45	Very often	Very often	Very often	Very often	Very often	Occasionally	Moderately	Very often	Seldom	Moderately	Seldom	Can't remember	Seldom	Occasionally	Occasionally	No	No	No	Yes	No	No	No	No	No	Yes	Postdoc	Other	Fear of retaliation		187	36
1	Principal Investigator	Male	White	46-55	Occasionally	Moderately	Seldom	Seldom	Moderately	Can't remember	Occasionally	Can't remember	Can't remember	Can't remember	Can't remember	Can't remember	Occasionally	Can't remember	Can't remember	No	No	No	Yes	No	No	No	No	No	No	Graduate Student	Sought support from colleagues/friends/family	Other		65
1	Group Leader	Male	White	46-55	Occasionally	Occasionally	Moderately	Moderately	Can't remember	Occasionally	Can't remember	Occasionally	Can't remember	Can't remember	Seldom	Seldom	Occasionally	Occasionally	Can't remember	No	No	No	No	No	No	No	No	No	No	Postdoc	Sought support from colleagues/friends/family	Other		65
1	Principal Investigator	Male	Asian	46-55	Very often	Very often	Very often	Very often	Very often	Very often	Very often	Can't remember	Very often	Can't remember	Very often	Can't remember	Very often	Very often	Very often	No	No	No	No	No	No	No	No	No	Yes	Graduate Student	Used code of silence (did not report)	Fear of retaliation		156
1	Group Leader	Male	White	46-55	Very often	Very often	Moderately	Very often	Can't remember	Very often	Very often	Very often	Very often	Very often	Very often	Occasionally	Very often	Very often	Very often	No	No		Yes	Yes	Yes	No	Yes	Yes	Yes	Graduate Student	Reported to my institution/body responsible for your institution		Unfair and biased	61
1	Principal Investigator	Male	White	46-55	Seldom	Seldom	Seldom	Seldom	Seldom	Very often	Moderately	Very often	Can't remember	Moderately	Moderately	Very often	Moderately	Very often	Very often	No	No	No	No	Yes	Yes	No	No	No	No	Postdoc	Reported to my institution/body responsible for your institution	Other	Unfair and biased	187	33
1	Group Leader	Male	White	56-65	Occasionally	Occasionally	Can't remember	Can't remember	Occasionally	Moderately	Moderately	Moderately	Occasionally	Can't remember	Moderately	Can't remember	Very often	Very often	Moderately	Yes	No	No	Yes	Yes	No	No	No	No	Yes	Other	Used code of silence (did not report)	Fear of being fired
1	Principal Investigator	Male	White0	46-55	Occasionally	Very often	Occasionally	Seldom	Seldom	Moderately	Moderately	Very often	Very often	Can't remember	Very often	Can't remember	Occasionally	Very often	Occasionally	Yes	No	No	No	No	No	No	No	No	No	Graduate Student	Sought support from colleagues/friends/family	Other	Other	187	23
1	Principal Investigator	Male	White	56-65	Seldom	Seldom	Can't remember	Can't remember	Occasionally	Can't remember	Occasionally	Occasionally	Can't remember	Can't remember	Can't remember	Can't remember	Can't remember	Occasionally	Occasionally	No	No	No	No	No	No	Yes	No	No	No	Postdoc	Sought support from colleagues/friends/family	Other		187	51
1	Principal Investigator	Male	White	56-65	Seldom	Occasionally	Seldom	Seldom	Moderately	Very often	Occasionally	Occasionally	Occasionally	Occasionally	Occasionally	Moderately	Occasionally	Occasionally	Very often	No	Yes	No	No	No	No	Yes	No	No	Yes	Postdoc	Reported to my institution/body responsible for your institution		Unfair and biased	187	5
1	Principal Investigator	Female	White	Over 66	Occasionally	Occasionally	Very often	Very often	Very often	Very often	Moderately	Very often	Very often	Can't remember	Very often	Moderately	Very often	Very often	Very often	Yes	No	Yes	No	No	Yes	Yes	No	No	No	Graduate Student	Sought support from colleagues/friends/family	Fear of retaliation	Unfair and biased	65
1	Principal Investigator	Male	White	56-65	Seldom	Seldom	Seldom	Seldom	Occasionally	Very often	Occasionally	Very often	Occasionally	Occasionally	Very often	Occasionally	Very often	Moderately	Very often	Yes	No	No	No	No	Yes	Yes		Yes	Yes	Postdoc	Used code of silence (did not report)	Fear of being fired	Other	187	14
1	Group Leader	Male	White	56-65	Occasionally	Seldom	Seldom	Moderately	Seldom	Moderately	Occasionally	Moderately	Can't remember	Occasionally	Moderately	Occasionally	Moderately	Seldom	Occasionally	Yes	No	Yes	No	No	Yes	Yes	No	Yes	Yes	Graduate Student	Sought support from colleagues/friends/family	Fear of retaliation		163
1	Department Chair	Female	White	56-65	Moderately		Very often	Moderately	Can't remember	Very often	Very often	Very often	Very often	Very often	Very often	Can't remember	Very often	Very often	Very often	Yes	No	No	Yes	Yes	Yes	No	Yes	Yes	Yes	Postdoc	Reported to my institution/body responsible for your institution		Unfair and biased	185
1	Principal Investigator	Male	White	56-65	Seldom	Moderately	Can't remember	Can't remember	Seldom	Seldom	Moderately	Can't remember	Seldom	Seldom	Can't remember	Very often	Can't remember	Very often	Seldom	Yes	No	Yes	Yes	Yes	No	No	Yes	No	Yes	Graduate Student	Reported to my institution/body responsible for your institution		Unfair and biased	168
1	Principal Investigator	Female	White	36-45	Occasionally	Seldom	Can't remember	Can't remember	Occasionally	Moderately	Seldom	Occasionally	Seldom	Moderately	Occasionally	Occasionally	Occasionally	Moderately	Moderately	No	No	No	No	No	Yes	Yes	No	No	No	Postdoc	Sought support from colleagues/friends/family	Fear of retaliation		65
1	Principal Investigator	Female	White	56-65	Occasionally	Moderately	Very often	Occasionally	Very often	Very often	Moderately	Moderately	Occasionally	Occasionally	Seldom	Seldom	Moderately	Moderately	Moderately	No	No	Yes	Yes	Yes	No	No	No	No	Yes	Postdoc	Sought support from colleagues/friends/family	Fear of retaliation		185
1	Principal Investigator	Male	White	46-55	Seldom	Moderately	Seldom	Moderately	Occasionally	Very often	Occasionally	Occasionally	Very often	Very often	Very often	Very often	Very often	Very often	Very often	No	No	Yes		Yes	Yes	Yes	Yes	Yes	Yes	Postdoc	Used code of silence (did not report)	Fear of being fired	Unfair and biased	65
1	Lab Supervisor	Male	White	46-55	Seldom	Very often	Moderately	Moderately	Very often	Occasionally	Seldom	Can't remember	Seldom	Moderately	Occasionally	Seldom	Moderately	Moderately	Moderately	No	No	Yes	No	No	No	No	No	No	Yes	Postdoc	Sought support from colleagues/friends/family	Fear of being fired	Unfair and biased	31
1	Principal Investigator	Female	White	46-55	Occasionally	Seldom	Seldom	Seldom	Occasionally	Moderately	Occasionally	Seldom	Seldom	Occasionally	Moderately	Seldom	Very often	Very often	Moderately	No	No	No	Yes	No	Yes	Yes	Yes	No	Yes	Postdoc	Sought support from colleagues/friends/family	Fear of retaliation	Unfair and biased	9
1	Principal Investigator	Male	White	46-55	Can't remember	Occasionally	Can't remember	Can't remember	Can't remember	Occasionally	Can't remember	Can't remember	Occasionally	Can't remember	Moderately	Can't remember	Occasionally	Very often	Very often	No	No	Yes	Yes	No	No	Yes	No	No	No	Graduate Student	Used code of silence (did not report)	Fear of retaliation		187	36
1	Principal Investigator	Male	White	36-45	Occasionally	Moderately	Occasionally	Seldom	Moderately	Seldom	Occasionally	Very often	Can't remember	Can't remember	Occasionally	Can't remember	Seldom	Very often	Very often	No	No	No	No	No	No	No	No	No	No	Graduate Student	Sought support from colleagues/friends/family	Fear of retaliation		187	22
1	Principal Investigator	Female	White	56-65	Moderately	Very often	Occasionally	Can't remember	Occasionally	Occasionally	Very often	Very often	Can't remember	Can't remember	Very often	Can't remember	Very often	Can't remember	Occasionally	No	No	No	No	No	No	No	No	No	No	Other	Sought support from colleagues/friends/family	Fear of retaliation		187	36
1	Department Chair	Male	Asian	25-35	Moderately	Moderately	Very often	Very often	Moderately	Occasionally	Seldom	Very often	Occasionally	Can't remember	Seldom	Can't remember	Can't remember	Very often	Can't remember	No	No	No	No	No	No	No	No	No	No	Visiting Scientist/Researcher	Sought support from colleagues/friends/family	Other	Unfair and biased	36
1	Principal Investigator	Male	White	36-45	Very often	Very often	Moderately	Very often	Very often	Very often	Very often	Very often	Occasionally	Can't remember	Moderately	Very often	Very often	Very often	Seldom	Yes	No	Yes	Yes	Yes	No	Yes	No	Yes	No	Graduate Student	Used code of silence (did not report)	Fear of retaliation	Other	187	10
1	Principal Investigator	Male	White	56-65	Occasionally	Can't remember	Very often	Can't remember	Can't remember	Can't remember	Seldom	Can't remember	Moderately	Seldom	Can't remember	Can't remember	Can't remember	Can't remember	Seldom	No	No	No	No	Yes	No	No	No	No	No	Visiting Scientist/Researcher	Reported to my institution/body responsible for your institution		Fair and unbiased	168
1	Principal Investigator	Female	White	36-45	Occasionally	Occasionally	Seldom	Seldom	Occasionally	Moderately	Occasionally	Very often	Occasionally	Can't remember	Very often	Occasionally	Very often	Very often	Moderately	Yes	No	Yes	Yes	No	No	No	No	No	Yes	Graduate Student	Sought support from colleagues/friends/family	Fear of retaliation	Unfair and biased
1	Principal Investigator	Male	Hispanic	46-55	Can't remember	Can't remember	Can't remember	Can't remember	Seldom	Can't remember	Can't remember	Can't remember	Can't remember	Occasionally	Very often	Moderately	Very often	Occasionally	Occasionally	No	No	Yes	No	No	Yes	Yes	Yes	Yes	Yes	Graduate Student	Used code of silence (did not report)	Fear of retaliation	Unfair and biased	135
1	Principal Investigator	Male	White	36-45	Moderately	Occasionally	Occasionally	Seldom	Very often	Very often	Moderately	Very often	Moderately	Occasionally	Very often	Can't remember	Very often	Occasionally	Very often	Yes	No	No	No	Yes	Yes	Yes	No	Yes	Yes	Graduate Student	Used code of silence (did not report)	Fear of being fired		168
1	Department Chair	Male	White	36-45	Very often	Very often	Very often	Very often	Very often	Very often	Very often	Very often	Moderately	Can't remember	Very often	Moderately	Very often	Seldom	Very often	Yes	No	No	Yes	Yes	No	No	Yes	No	No	Other	Sought support from colleagues/friends/family	Fear of retaliation	Unfair and biased	31
1	Principal Investigator	Female	White	36-45	Seldom	Occasionally	Can't remember	Can't remember	Occasionally	Occasionally	Can't remember	Very often	Very often	Moderately	Very often	Moderately	Moderately	Can't remember	Very often	No	No	No	No	No	Yes	Yes	Yes	Yes	No	Graduate Student	Reported to my institution/body responsible for your institution	Other	Unfair and biased	31	53
1	Principal Investigator	Male	Asian	46-55	Can't remember	Very often	Can't remember	Can't remember	Seldom	Can't remember	Very often	Can't remember	Can't remember	Moderately	Seldom	Can't remember	Can't remember	Seldom	Can't remember	No	No	Yes	No	No	No	No	No	No	No	Postdoc	Used code of silence (did not report)	Fear of retaliation	Other	187	6
1	Principal Investigator	Male	White	56-65							Occasionally																			Postdoc
1	Department Chair	Male	White	36-45	Can't remember	Can't remember	Can't remember	Can't remember	Occasionally	Can't remember	Moderately	Can't remember	Moderately	Can't remember	Very often	Can't remember	Very often	Can't remember	Can't remember	No	No	No	No	No	Yes	Yes	No	Yes	No	Postdoc	Used code of silence (did not report)	Fear of retaliation		65
1	Principal Investigator	Male	White	36-45	Moderately	Seldom	Can't remember	Can't remember	Very often	Very often	Can't remember	Can't remember	Very often	Very often	Moderately	Very often	Very often	Very often	Very often	Yes	No	No	No	Yes	No	No	No	No	No	Graduate Student	Reported to my institution/body responsible for your institution		Unfair and biased	61
1	Group Leader	Male	White	36-45	Occasionally	Occasionally	Can't remember	Can't remember	Moderately	Moderately	Moderately	Seldom	Seldom	Can't remember	Seldom	Can't remember	Occasionally	Can't remember	Can't remember	No	No	No	No	No	Yes	No	No	Yes	No	Graduate Student	Reported to my institution/body responsible for your institution		Other	187	10
1	Principal Investigator	Male	White	36-45	Very often	Very often	Seldom	Seldom	Very often	Very often	Moderately	Very often	Moderately	Very often	Very often	Very often	Very often	Very often	Very often	No	Yes	Yes	Yes	Yes	No	Yes	No	No	Yes	Graduate Student	Reported to my institution/body responsible for your institution		Unfair and biased	31
1	Principal Investigator	Male	White	46-55	Moderately	Occasionally	Moderately	Moderately	Very often	Moderately	Seldom	Moderately	Seldom	Seldom	Very often	Moderately	Very often	Very often	Moderately	No	No	Yes	Yes	No	Yes	Yes	No	No	No	Undergraduate Student	Reported to my institution/body responsible for your institution		Unfair and biased	60
1	Principal Investigator	Female	White	36-45	Seldom	Can't remember	Can't remember	Can't remember	Occasionally	Can't remember	Can't remember	Can't remember	Occasionally	Can't remember	Seldom	Occasionally	Can't remember	Occasionally	Can't remember	No	No	No	No	No	No	No	No	No	No	Graduate Student	Sought support from colleagues/friends/family	Fear of retaliation		187	33
1	Principal Investigator	Female	White	36-45	Occasionally	Seldom	Can't remember	Seldom	Moderately	Moderately	Very often	Moderately	Very often	Moderately	Very often	Very often	Moderately	Moderately	Occasionally	No		Yes		Yes				Yes		Graduate Student	Other		Unfair and biased
1	Principal Investigator	Male	White	46-55	Seldom	Can't remember	Moderately	Can't remember	Moderately	Occasionally	Very often	Very often	Occasionally	Can't remember	Moderately	Occasionally	Very often	Very often	Very often	No	No	No	No	No	Yes	No	No	No	Yes	Postdoc	Used code of silence (did not report)	Fear of being fired	Other	187	33
1	Group Leader	Female	White	46-55	Occasionally	Can't remember	Seldom	Seldom	Moderately	Very often	Moderately	Very often	Moderately	Very often	Very often	Moderately	Very often	Moderately	Very often	Yes	No	No	Yes	Yes	Yes	Yes	No	Yes	Yes	Graduate Student	Sought support from colleagues/friends/family	Fear of retaliation	Other	26
1	Principal Investigator	Male	White	56-65	Very often	Very often	Seldom	Occasionally	Moderately	Occasionally	Very often	Seldom	Seldom	Can't remember	Can't remember	Can't remember	Occasionally	Can't remember	Can't remember	No	No	Yes	No	No	No	No	No	No	No	Graduate Student	Sought support from colleagues/friends/family	Fear of retaliation	Other	31
1	Principal Investigator	Male	White	56-65	Occasionally	Seldom	Occasionally	Can't remember	Can't remember	Moderately	Can't remember	Can't remember	Can't remember	Can't remember	Occasionally	Can't remember	Can't remember	Can't remember	Can't remember	No	No	No	Yes	No	No	No	No	No	No	Postdoc	Sought support from colleagues/friends/family	Fear of retaliation		187	45
1	Principal Investigator	Female	Asian	36-45	Moderately	Occasionally	Seldom	Seldom	Moderately	Occasionally	Occasionally	Very often	Seldom	Can't remember	Moderately	Very often	Occasionally	Very often	Seldom	Yes	No	Yes	Yes	No	Yes	Yes	No	No	No	Graduate Student	Reported to my institution/body responsible for your institution	Other	Unfair and biased	187	22
1	Department Chair	Male	Middle Eastern	46-55													Very often															Other
1	Principal Investigator	Male	White	25-35	Moderately	Very often	Moderately	Occasionally	Very often	Very often	Occasionally	Very often	Very often	Can't remember	Moderately	Can't remember	Very often	Moderately	Moderately	No	No	Yes	No	No	Yes	Yes	No	No	No	Graduate Student	Used code of silence (did not report)	Fear of retaliation		187	14
1	Principal Investigator	Female	East Indian	46-55	Occasionally	Occasionally	Seldom	Seldom	Occasionally	Very often	Seldom	Seldom	Occasionally	Can't remember	Moderately	Occasionally	Moderately	Moderately	Moderately	Yes	No	Yes	Yes	Yes	Yes	Yes	No	No	No	Postdoc	Sought support from colleagues/friends/family			187	11
1	Principal Investigator	Female	White	36-45	Seldom		Can't remember	Occasionally	Can't remember	Moderately	Occasionally	Occasionally	Can't remember	Occasionally	Moderately	Seldom	Moderately	Moderately	Moderately	Yes	No	No	Yes	No	Yes	No		Yes	No	Graduate Student	Sought support from colleagues/friends/family	Fear of retaliation		187	22
1	Principal Investigator	Male	White	56-65	Moderately	Very often	Very often	Very often	Seldom	Moderately	Moderately	Moderately	Very often	Very often	Occasionally	Very often	Seldom	Seldom	Moderately	Yes	Yes	Yes	No	Yes	No	No	No	No	Yes	Graduate Student	Used code of silence (did not report)	Other	Other	187	33
1	Principal Investigator	Female	White	46-55	Moderately	Moderately	Moderately	Very often	Very often	Very often	Very often	Very often	Very often	Occasionally	Very often	Moderately	Very often	Very often	Very often	No	No	Yes	Yes	No	Yes	Yes	No	Yes	No	Graduate Student	Sought support from colleagues/friends/family	Fear of retaliation		138
1	Principal Investigator	Male	White	46-55	Occasionally	Can't remember	Can't remember	Can't remember	Occasionally	Occasionally	Can't remember	Can't remember	Can't remember	Can't remember	Seldom	Can't remember	Can't remember	Can't remember	Can't remember	No	No	No	No	No	No	No	No	No	No	Postdoc	Sought support from colleagues/friends/family	Fear of retaliation		187
1	Principal Investigator	Male	White	36-45	Very often	Very often	Moderately	Very often	Very often	Very often	Very often	Very often	Moderately	Very often	Very often	Very often	Occasionally	Can't remember	Very often	Yes	No	Yes	No	Yes	No	No	No	No	Yes	Undergraduate Student	Reported to my institution/body responsible for your institution	Other	Unfair and biased	185
1	Principal Investigator	Female	Mixed Race	46-55	Seldom	Seldom	Occasionally	Can't remember	Seldom	Can't remember	Can't remember	Can't remember	Can't remember	Can't remember	Occasionally	Occasionally	Occasionally	Occasionally	Seldom	No	No	No	No	No	Yes	Yes	No	No	No	Graduate Student	Sought support from colleagues/friends/family	Fear of retaliation	Unfair and biased	187	45
1	Principal Investigator	Female	Black or African American	46-55	Very often	Very often	Very often	Very often	Very often	Moderately	Moderately	Moderately	Moderately	Very often	Moderately	Moderately	Moderately	Very often	Very often	Yes	No	No	No	Yes	No	No	No	No	Yes	Other	Reported to my institution/body responsible for your institution	Other	Other	187	23
1	Principal Investigator	Male	White	36-45	Occasionally	Moderately	Very often	Moderately	Can't remember	Very often	Very often	Moderately	Can't remember	Can't remember	Very often	Very often	Very often	Very often	Very often				Yes	Yes	Yes	Yes		Yes	Yes	Graduate Student	Sought support from colleagues/friends/family	Fear of retaliation	Unfair and biased	163
1	Principal Investigator	Male	White	36-45	Seldom	Seldom	Can't remember	Can't remember	Can't remember	Occasionally	Occasionally	Can't remember	Seldom	Can't remember	Occasionally	Occasionally	Occasionally	Can't remember	Can't remember	Yes	No	No	Yes	No	No	No	No	No	Yes	Graduate Student	Used code of silence (did not report)	Fear of retaliation		65
1	Principal Investigator	Male	White	46-55	Occasionally	Moderately	Moderately	Seldom	Moderately	Very often	Moderately	Moderately	Moderately	Can't remember	Moderately	Can't remember	Very often	Very often	Moderately	No	No	No	No	Yes	Yes	Yes	No	Yes	No	Postdoc	Sought support from colleagues/friends/family	Fear of retaliation	Unfair and biased	122
1	Principal Investigator	Male	White	56-65	Occasionally	Occasionally	Can't remember	Can't remember	Can't remember	Occasionally	Can't remember	Can't remember	Occasionally	Occasionally	Occasionally	Can't remember	Occasionally	Occasionally	Can't remember	No	No	No	Yes	No	No	No	No	No	Yes	Other	Sought support from colleagues/friends/family	Other	Other	187	34
1	Department Chair	Male	White	36-45	Very often	Very often	Seldom	Seldom	Occasionally	Very often	Very often	Very often	Occasionally	Can't remember	Occasionally	Moderately	Very often	Moderately	Very often	Yes	No	No	No	No	No	No	No	No	No	Other	Used code of silence (did not report)	Fear of retaliation	Other	185
1	Principal Investigator	Male	White	36-45	Can't remember	Moderately	Can't remember	Can't remember	Seldom	Can't remember	Seldom	Seldom	Can't remember	Can't remember	Occasionally	Occasionally	Occasionally	Occasionally	Seldom	No	No	No	No	No	Yes	Yes	No	No	No	Graduate Student	Sought support from colleagues/friends/family	Other		84
1	Department Chair	Male	White		Occasionally	Occasionally				Moderately					Very often		Very often			Yes										Other	Sought support from colleagues/friends/family	Fear of retaliation	Other	187
1	Principal Investigator	Female	White	56-65	Very often	Can't remember	Occasionally	Occasionally	Very often	Very often	Very often	Very often	Can't remember	Can't remember	Occasionally	Very often	Very often	Very often	Very often	Yes	Yes	No	Yes	Yes	No	No	No	No	Yes	Postdoc	Reported to my institution/body responsible for your institution	Visa issues	Unfair and biased	187	10
1	Principal Investigator	Male	East Indian	36-45	Can't remember	Can't remember	Can't remember	Can't remember	Occasionally	Occasionally	Can't remember	Very often	Moderately	Seldom	Very often	Occasionally	Occasionally	Very often	Very often	No	No	Yes	No	Yes	Yes	Yes	No	No	No	Graduate Student	Reported to my institution/body responsible for your institution	Other	Other	187	22
1	Department Chair	Male	White	56-65	Very often	Seldom	Moderately	Moderately	Occasionally	Very often	Very often	Very often	Very often	Very often	Very often	Seldom	Very often	Very often	Very often	Yes	No	No	Yes	Yes	Yes	Yes	No	Yes	Yes	Graduate Student	Used code of silence (did not report)	Fear of retaliation		65
1	Department Chair	Female	White	46-55	Occasionally	Seldom	Occasionally	Occasionally	Moderately	Occasionally	Occasionally	Seldom	Seldom	Seldom	Can't remember	Seldom	Can't remember	Seldom	Occasionally	No	No	Yes	No	Yes	No	No	No	Yes	Yes	Other	Sought support from colleagues/friends/family	Fear of retaliation	Other	142
1	Department Chair	Male	White	56-65	Moderately	Occasionally	Moderately	Moderately	Seldom	Very often	Very often	Occasionally	Moderately	Very often	Seldom	Moderately	Very often	Can't remember	Very often	Yes	No	No	No	Yes	No	No	No	No	No	Other	Reported to my institution/body responsible for your institution	Other	Other	187	45
1	Principal Investigator	Female	White	36-45	Can't remember	Can't remember	Can't remember	Can't remember	Can't remember	Very often	Can't remember	Can't remember	Can't remember	Can't remember	Occasionally	Moderately	Moderately	Moderately	Moderately	Yes	No	Yes	No	No	No	No	No	No	Yes	Postdoc	Used code of silence (did not report)	Fear of retaliation	Other	187	22
1	Group Leader	Male	White	46-55	Occasionally	Can't remember	Occasionally	Moderately	Seldom	Can't remember	Occasionally	Can't remember	Very often	Can't remember	Can't remember	Can't remember	Occasionally	Very often	Very often	No	No	Yes	Yes	No	No	No	No	No	No	Visiting Scientist/Researcher	Used code of silence (did not report)	Other		187	11
1	Principal Investigator	Male	White	Over 66	Very often	Occasionally	Can't remember	Seldom	Moderately	Moderately	Moderately	Can't remember	Occasionally	Can't remember	Very often	Can't remember	Very often	Occasionally	Can't remember	No	No	No	No	Yes	Yes	Yes	No	Yes	Yes	Other	Sought support from colleagues/friends/family	Fear of being fired	Other	187
1	Department Chair	Female	White	56-65	Occasionally	Moderately	Seldom	Can't remember	Moderately	Very often	Very often	Very often	Occasionally	Occasionally	Very often	Very often	Very often	Very often	Very often	No	No	No	No	Yes	Yes	Yes	Yes	Yes	Yes	Other	Sought support from colleagues/friends/family	Fear of being fired		187	47
1	Principal Investigator	Male	White	56-65	Can't remember	Seldom	Can't remember	Can't remember	Occasionally	Moderately	Can't remember	Can't remember	Can't remember	Can't remember	Moderately	Can't remember	Moderately	Moderately	Moderately	Yes	No	Yes	No	No	No	Yes	No	No	No	Postdoc	Used code of silence (did not report)	Other	Unfair and biased	187	23
1	Department Chair	Male	White	Over 66	Can't remember	Can't remember	Can't remember	Can't remember	Can't remember	Can't remember	Can't remember	Can't remember	Very often	Seldom	Can't remember	Can't remember	Can't remember	Can't remember	Can't remember	No	No	Yes	No	No	No	No	Yes	No	Yes	Other	Used code of silence (did not report)	Fear of being fired		163
1	Lab Supervisor	Male	East Indian	46-55	Seldom	Can't remember	Can't remember	Can't remember	Can't remember	Can't remember	Can't remember	Can't remember	Can't remember	Can't remember	Seldom	Seldom	Can't remember	Seldom	Can't remember	No	No	Yes		No	Yes	Yes	Yes	Yes	No	Graduate Student	Used code of silence (did not report)	Other	Unfair and biased	78
1	Department Chair	Female	White	46-55	Moderately	Seldom	Occasionally	Seldom	Moderately	Very often	Moderately	Very often	Moderately	Moderately	Very often	Very often	Very often	Very often	Very often	Yes	No	No	Yes	Yes	No	No	No	No	Yes	Other	Sought support from colleagues/friends/family	Fear of retaliation		187	23
1	Department Chair	Female	White	Over 66	Occasionally	Can't remember	Occasionally	Can't remember	Very often	Very often	Occasionally	Very often	Very often	Can't remember	Can't remember	Can't remember	Very often	Can't remember	Can't remember	No	No	No	No	Yes	No	No	Yes	Yes	No	Other	Reported to my institution/body responsible for your institution		Unfair and biased	187	23
1	Principal Investigator	Male	White	46-55	Moderately	Occasionally	Occasionally	Can't remember	Occasionally	Very often	Moderately	Moderately	Very often	Can't remember	Very often	Can't remember	Very often	Can't remember	Very often	No	No	No	No	Yes	Yes	Yes	No	No	No	Other	Sought support from colleagues/friends/family		Unfair and biased	31
1	Principal Investigator	Male	White	56-65	Very often	Moderately	Occasionally	Moderately	Very often	Moderately	Moderately	Very often	Very often	Occasionally	Can't remember	Occasionally	Very often	Very often	Occasionally	No	No	Yes	No	No	No	No	No	No	No	Graduate Student	Sought support from colleagues/friends/family	Other		185
1	Principal Investigator	Female	White	36-45	Very often	Very often	Occasionally	Very often	Occasionally	Occasionally	Moderately	Can't remember	Occasionally	Moderately	Occasionally	Occasionally	Moderately	Occasionally	Can't remember	No	No	No	Yes	No	No	No	No	No	Yes	Graduate Student	Sought support from colleagues/friends/family	Other		10
1	Principal Investigator	Male	Asian	36-45	Moderately	Very often	Very often	Moderately	Very often	Very often	Very often	Occasionally	Seldom	Very often	Moderately	Very often	Moderately	Moderately	Occasionally	No	No	Yes	No	No	No	Yes	No	Yes	Yes	Other	Sought support from colleagues/friends/family	Fear of being fired	Unfair and biased	187	22
1	Principal Investigator	Male	White	46-55	Moderately	Occasionally	Moderately	Seldom	Can't remember	Occasionally	Occasionally	Can't remember	Seldom	Can't remember	Can't remember	Can't remember	Occasionally	Seldom	Moderately	No	Yes	Yes	No	Yes	No	No	No	No	Yes	Postdoc	Sought support from colleagues/friends/family	Fear of retaliation		187	22
1	Principal Investigator	Male	White	46-55	Can't remember	Can't remember	Occasionally	Can't remember	Can't remember	Very often	Seldom	Can't remember	Very often	Seldom	Can't remember	Very often	Can't remember	Can't remember	Very often	Yes	No	No	Yes	Yes	Yes	No	No	No	Yes	Graduate Student	Sought support from colleagues/friends/family	Fear of retaliation		31
1	Principal Investigator	Female	White	46-55	Seldom	Occasionally	Can't remember	Can't remember	Can't remember	Can't remember	Can't remember	Can't remember	Seldom	Can't remember	Seldom	Can't remember	Seldom	Can't remember	Can't remember	No	No	No	No	No	No	No	No	No	No	Graduate Student	Sought support from colleagues/friends/family	Other		187	5
1	Department Chair	Female	White	25-35	Can't remember	Seldom	Moderately	Moderately	Very often	Very often	Seldom	Can't remember	Occasionally	Moderately	Moderately	Seldom	Can't remember		Moderately	No	No	No	No	Yes	No	No	No	No	No	Postdoc	Used code of silence (did not report)	Fear of being fired	Other	187	22
1	Principal Investigator	Male	White	Over 66	Seldom	Can't remember	Occasionally	Can't remember	Can't remember	Can't remember	Seldom	Can't remember	Can't remember	Can't remember	Can't remember	Can't remember	Can't remember	Can't remember	Can't remember	No	No	No	No	No	No	No	No	No	No	Postdoc	Used code of silence (did not report)	Other		187	19
1	Department Chair	Female	White	56-65	Occasionally	Can't remember		Occasionally		Moderately	Occasionally	Seldom	Can't remember	Seldom	Seldom	Can't remember	Occasionally	Can't remember	Can't remember	Yes	No	No	No	Yes	No	No	No	No	Yes	Other	Sought support from colleagues/friends/family	Fear of retaliation	Unfair and biased	187	23
1	Principal Investigator	Prefer not to specify	Asian	36-45	Occasionally	Very often	Moderately	Occasionally	Moderately	Can't remember	Seldom	Seldom	Can't remember	Occasionally	Moderately	Very often	Occasionally	Very often	Moderately	No	Yes	Yes	Yes	No	No	Yes	No	No	Yes	Graduate Student	Sought support from colleagues/friends/family	Other	Unfair and biased
1	Group Leader	Male	White	46-55	Very often	Moderately	Moderately	Occasionally	Very often	Very often	Very often	Very often	Seldom	Can't remember	Occasionally	Can't remember	Seldom	Can't remember	Can't remember	No	No	No	No	Yes	No	No	No	No	No	Graduate Student	Sought support from colleagues/friends/family	Fear of retaliation		65
1	Principal Investigator	Male	White	46-55	Can't remember	Can't remember	Can't remember	Occasionally	Seldom	Can't remember	Can't remember	Seldom	Can't remember	Can't remember	Can't remember	Can't remember	Can't remember	Can't remember	Can't remember	No	No	Yes	No	No	No	No	No	No	No	Postdoc	Sought support from colleagues/friends/family	Fear of retaliation		187	22
1	Principal Investigator	Male	White	46-55	Very often	Occasionally	Occasionally	Seldom	Seldom	Moderately	Moderately	Can't remember	Can't remember	Can't remember	Very often	Can't remember	Very often	Very often	Can't remember	No	No	Yes	No	No	No	No	No	No	No	Graduate Student	Used code of silence (did not report)	Visa issues		122
1	Principal Investigator	Female	White	56-65	Seldom	Can't remember	Very often	Occasionally	Occasionally	Moderately	Occasionally	Seldom	Seldom	Can't remember	Very often	Moderately	Very often	Occasionally	Very often	No	No	No	Yes	No	Yes	No	No	Yes	Yes	Visiting Scientist/Researcher	Sought support from colleagues/friends/family	Fear of retaliation		100
1	Principal Investigator	Female	Asian	46-55	Occasionally	Occasionally	Occasionally	Moderately	Very often	Very often	Moderately	Occasionally	Moderately	Very often	Very often	Very often	Very often	Very often	Very often	No	No	Yes	No	Yes	Yes	Yes	No	Yes	Yes	Postdoc	Sought support from colleagues/friends/family	Visa issues		187	45
1	Principal Investigator	Male	Middle Eastern	56-65	Seldom	Seldom		Occasionally	Occasionally	Seldom	Can't remember	Seldom	Can't remember	Moderately	Can't remember	Can't remember	Occasionally	Moderately	Moderately	No	Yes	Yes	Yes	No	No	No	Yes	No	Yes	Other	Sought support from colleagues/friends/family	Fear of retaliation			5
1	Lab Supervisor	Male	White	46-55	Moderately	Moderately	Occasionally	Can't remember	Can't remember	Occasionally	Can't remember	Very often	Very often	Moderately	Very often	Very often	Can't remember	Very often	Very often	Yes	No	Yes	No	No	No	No	No	No	Yes	Graduate Student	Reported to my institution/body responsible for your institution	Fear of retaliation	Unfair and biased	84
1	Department Chair	Female	Mixed Race	36-45	Occasionally	Can't remember	Moderately	Moderately	Can't remember	Occasionally	Can't remember	Seldom	Can't remember	Can't remember	Can't remember	Can't remember	Can't remember	Can't remember	Can't remember	No	No	No	No	No	No	No	No	No	No	Graduate Student	Sought support from colleagues/friends/family	Other		187	24
1	Principal Investigator	Female	White	56-65	Occasionally	Can't remember	Moderately	Very often	Very often	Moderately	Very often	Can't remember	Seldom	Can't remember	Seldom	Seldom	Seldom	Occasionally	Seldom	No	No	No	No	No	No	No	No	No	No	Postdoc	Used code of silence (did not report)	Fear of retaliation	Unfair and biased	61
1	Principal Investigator	Male	White	36-45	Moderately	Occasionally	Very often	Seldom	Can't remember	Moderately	Very often	Can't remember	Can't remember	Can't remember	Occasionally	Can't remember	Occasionally	Moderately	Occasionally	No	No	No	No	No	Yes	Yes	No	No	No	Postdoc	Sought support from colleagues/friends/family	Other	Other	187	5
1	Principal Investigator	Female	White	46-55	Seldom	Occasionally	Occasionally	Occasionally	Occasionally	Moderately	Moderately	Occasionally	Seldom	Very often	Can't remember	Occasionally	Can't remember	Can't remember	Can't remember	No	Yes	No	Yes	No	No	No	No	Yes	Yes	Graduate Student	Reported to my institution/body responsible for your institution		Unfair and biased	187	51
1	Principal Investigator	Female	Middle Eastern	56-65	Very often	Can't remember	Seldom	Moderately	Very often	Can't remember	Very often	Very often	Can't remember	Can't remember	Moderately	Moderately	Very often	Very often	Very often	Yes	Yes	Yes	Yes	No	Yes	Yes	No	Yes	Yes	Postdoc	Reported to my institution/body responsible for your institution		Unfair and biased	187	33
1	Principal Investigator	Male	White	56-65	Moderately	Seldom	Very often	Moderately	Very often	Very often	Very often	Occasionally	Very often	Occasionally	Occasionally	Can't remember	Occasionally	Very often	Very often	No	No	No	Yes	Yes	No	Yes	No	Yes	Yes	Graduate Student	Reported to my institution/body responsible for your institution		Unfair and biased
1	Principal Investigator	Female	Asian	46-55	Occasionally	Moderately	Occasionally	Occasionally	Very often	Very often	Occasionally	Moderately	Moderately	Seldom	Very often	Very often	Very often	Very often	Moderately	Yes	Yes	Yes	No	Yes	Yes	No	No	No	Yes	Visiting Scientist/Researcher	Used code of silence (did not report)	Fear of retaliation	Unfair and biased	187	45
1	Department Chair	Male	White	56-65	Seldom	Moderately	Moderately	Can't remember	Occasionally	Can't remember	Seldom	Moderately	Occasionally	Can't remember	Can't remember	Can't remember	Occasionally	Can't remember	Seldom	No	No	No	No	No	No	No	No	No	No	Graduate Student	Sought support from colleagues/friends/family		Other
1	Group Leader	Male	White	46-55	Occasionally	Moderately	Occasionally	Seldom	Very often	Occasionally	Occasionally	Occasionally	Seldom	Occasionally	Moderately	Can't remember	Very often	Very often	Very often	No	No	Yes	Yes	No	Yes	Yes	No	Yes	Yes	Postdoc	Sought support from colleagues/friends/family	Fear of retaliation	Other	60	53
1	Principal Investigator	Male	White	46-55	Moderately	Occasionally	Occasionally	Occasionally	Moderately	Occasionally	Seldom	Moderately	Occasionally	Can't remember	Can't remember	Can't remember	Can't remember	Seldom	Seldom	No	No	No	No	No	No	No	No	No	Yes	Postdoc	Sought support from colleagues/friends/family	Other	Unfair and biased	168
1	Principal Investigator	Male	White	46-55	Very often	Very often	Moderately	Seldom	Very often	Moderately	Very often	Very often	Can't remember	Seldom	Occasionally	Moderately	Seldom	Moderately	Seldom	No	No	Yes	Yes	Yes	No	No	No	No	Yes	Graduate Student	Reported to my institution/body responsible for your institution		Unfair and biased	187	4
1	Principal Investigator	Female	Asian	46-55	Very often	Very often	Very often	Very often	Very often	Very often	Very often	Very often	Can't remember	Very often	Seldom	Can't remember	Seldom	Very often	Very often	No	Yes	No	No	Yes	No	No	No	No	Yes	Postdoc	Sought support from colleagues/friends/family	Fear of retaliation		187	5
1	Group Leader	Male	White	46-55	Seldom	Can't remember	Seldom	Occasionally	Can't remember	Moderately	Seldom	Moderately	Very often	Very often	Moderately	Can't remember	Occasionally	Very often	Very often	Yes	No	No	No	Yes	No	Yes	No	No	No	Postdoc	Reported to my institution/body responsible for your institution		Unfair and biased
1	Department Chair	Female	Mixed Race	36-45	Very often	Moderately	Can't remember	Very often	Very often	Very often	Very often	Very often	Can't remember	Can't remember	Very often	Can't remember	Very often	Very often	Can't remember	Yes	No	No	No	No	No	No	No	No	Yes	Other	Reported to my institution/body responsible for your institution		Unfair and biased	187	9
1	Principal Investigator	Female	White	46-55	Moderately	Very often	Occasionally	Seldom	Moderately	Moderately	Moderately	Very often	Seldom	Very often	Very often	Very often	Very often	Very often	Very often	Yes	No	No	No	No	Yes	Yes	No	No	Yes	Postdoc	Reported to my institution/body responsible for your institution	Other	Unfair and biased	187
1	Principal Investigator	Male	White	36-45	Moderately	Very often	Very often	Very often	Very often	Very often	Very often	Very often	Moderately	Can't remember	Moderately	Can't remember	Seldom	Seldom	Seldom	Yes	No	No	Yes	No	No	No	No	No	Yes	Graduate Student	Other	Fear of retaliation	Other	187	6
1	Principal Investigator	Male	Asian	36-45	Very often	Very often	Very often	Very often	Very often	Very often	Very often	Very often	Moderately	Can't remember	Very often	Very often	Very often	Very often	Very often	Yes	Yes	No	Yes	Yes	Yes	Yes	No	No	Yes	Graduate Student	Used code of silence (did not report)	Fear of retaliation	Other	156
1	Lab Supervisor	Female	White	36-45	Occasionally	Occasionally	Can't remember	Occasionally	Can't remember	Moderately	Occasionally	Can't remember	Can't remember	Can't remember	Occasionally	Can't remember	Can't remember	Can't remember	Can't remember	No	No	No	No	No	No	Yes	No	No	No	Visiting Scientist/Researcher	Sought support from colleagues/friends/family	Fear of retaliation	Other	138
1	Principal Investigator	Male	White	36-45	Can't remember	Can't remember	Can't remember	Seldom	Moderately	Seldom	Occasionally	Moderately	Occasionally	Very often	Occasionally	Seldom	Moderately	Moderately	Very often	Yes	No	No	Yes	No	No	Yes	No	No	Yes	Postdoc	Sought support from colleagues/friends/family	Fear of retaliation	Other	101
1	Principal Investigator	Male	White	46-55	Moderately	Can't remember	Occasionally	Occasionally	Moderately	Can't remember	Seldom	Can't remember	Can't remember	Can't remember	Moderately	Can't remember	Moderately	Moderately	Can't remember	No	No	No	No	No	Yes	Yes	No	No	Yes	Postdoc	Other	Fear of retaliation		187	22
1	Principal Investigator	Male	Asian	Over 66	Very often	Moderately	Moderately	Very often	Very often	Seldom	Very often	Very often	Can't remember	Can't remember	Moderately	Occasionally	Moderately	Moderately	Can't remember	No	No	No	No	No	No	Yes	No	No	No	Graduate Student	Reported to my institution/body responsible for your institution	Other	Unfair and biased	187	5
1	Principal Investigator	Prefer not to specify	White	56-65	Occasionally	Can't remember	Can't remember	Occasionally	Can't remember	Very often	Can't remember	Very often	Seldom	Moderately	Very often	Seldom	Occasionally	Occasionally	Moderately	Yes	No	No	Yes	Yes	Yes	Yes	Yes	Yes	Yes	Postdoc	Sought support from colleagues/friends/family	Other	Unfair and biased	31
1	Department Chair	Male	White	36-45	Very often	Occasionally	Moderately	Occasionally	Very often	Very often	Moderately	Can't remember	Occasionally	Moderately	Moderately	Moderately	Moderately	Can't remember	Moderately	Yes	No	No	No	Yes	Yes	Yes	No	Yes	No	Other	Reported to my institution/body responsible for your institution	Fear of retaliation	Fair and unbiased
1	Department Chair	Female	Black or African American	36-45	Occasionally	Can't remember	Can't remember	Occasionally	Can't remember	Moderately	Occasionally	Can't remember	Occasionally	Can't remember	Occasionally	Can't remember	Can't remember	Can't remember	Occasionally	No	No	No	No	No	No	No	No	No	No	Other	Used code of silence (did not report)	Fear of retaliation		187	14
1	Principal Investigator	Male	White	36-45	Occasionally	Moderately	Can't remember	Moderately	Moderately	Very often	Moderately	Very often	Very often	Very often	Very often	Can't remember	Very often	Very often	Very often	Yes	No	No	Yes	Yes	Yes	No	No	No	Yes	Postdoc	Sought support from colleagues/friends/family	Fear of retaliation		122
1	Principal Investigator	Female	White	36-45	Moderately	Seldom	Can't remember	Can't remember	Occasionally	Very often	Moderately	Very often	Can't remember	Moderately	Very often	Can't remember	Very often	Very often	Very often	Yes	No	Yes	Yes	No	Yes	No	No	No	Yes	Graduate Student	Reported to my institution/body responsible for your institution	Fear of retaliation	Unfair and biased	9	53
1	Principal Investigator	Male	White	56-65	Very often	Moderately	Moderately	Moderately	Moderately	Moderately	Very often	Moderately	Very often	Seldom	Occasionally	Can't remember	Seldom	Occasionally	Moderately					No		Yes	Yes			Postdoc	Used code of silence (did not report)	Fear of being fired		187	5
1	Principal Investigator	Male	White	36-45	Moderately	Moderately	Moderately	Moderately	Moderately	Very often	Very often	Moderately	Moderately	Very often	Very often	Very often	Very often	Very often	Very often	Yes	No		Yes		Yes	Yes	Yes	Yes	Yes	Postdoc	Sought support from colleagues/friends/family	Fear of retaliation	Other	187
1	Principal Investigator	Female	White	46-55	Can't remember	Can't remember	Can't remember	Can't remember	Very often	Very often	Seldom	Moderately	Can't remember	Seldom	Can't remember	Moderately	Can't remember	Seldom		No	No	No	No	No	No	No	No	No	No	Graduate Student	Reported to my institution/body responsible for your institution		Other	17
1	Principal Investigator	Male	White	36-45	Very often	Moderately	Occasionally	Moderately	Occasionally	Can't remember	Very often	Occasionally	Seldom	Can't remember	Can't remember	Can't remember	Moderately	Can't remember	Seldom	No	No	No	Yes	Yes	No	No	No	No	No	Graduate Student	Used code of silence (did not report)	Fear of retaliation	Unfair and biased	187	5
1	Lab Supervisor	Male	Asian	36-45	Very often	Moderately	Very often	Moderately	Very often	Very often	Occasionally	Moderately	Very often	Occasionally	Moderately	Moderately	Moderately	Very often	Very often	No	No	Yes	Yes	Yes	No	Yes	No	No	No	Graduate Student	Sought support from colleagues/friends/family	Fear of retaliation	Other	9
1	Principal Investigator	Female	White	46-55	Moderately	Very often	Occasionally	Occasionally	Very often	Moderately	Occasionally	Very often	Seldom	Can't remember	Moderately	Can't remember	Very often	Moderately	Occasionally	Yes	No	Yes	Yes	No	No	No	No	No	Yes	Graduate Student	Sought support from colleagues/friends/family	Fear of retaliation	Fair and unbiased	122
1	Department Chair	Female	Middle Eastern	46-55	Occasionally	Moderately	Occasionally	Occasionally	Very often	Moderately	Seldom	Very often	Very often	Can't remember	Occasionally	Very often	Very often	Very often	Very often	No	No	No	No	No	No	No	No	No	No	Other	Reported to my institution/body responsible for your institution		Other	187
1	Department Chair	Male	Asian	46-55	Seldom	Very often	Very often	Very often	Can't remember	Very often	Very often	Can't remember	Very often	Can't remember	Occasionally	Very often	Very often	Occasionally	Can't remember	Yes	No	Yes	No	Yes	Yes	No	No	No	No	Graduate Student	Sought support from colleagues/friends/family	Fear of retaliation		187	45
1	Group Leader	Female	White	56-65	Occasionally	Can't remember	Seldom	Occasionally	Moderately	Can't remember	Seldom	Can't remember	Moderately	Can't remember	Occasionally	Seldom	Moderately	Seldom	Can't remember	No	No		No	Yes	No				No	Postdoc	Sought support from colleagues/friends/family	Fear of retaliation	Unfair and biased	143
1	Department Chair	Male	White	46-55	Very often	Very often	Very often	Very often	Seldom	Very often	Very often	Occasionally	Very often	Very often	Very often	Can't remember	Very often	Very often	Very often	Yes	No	No	Yes	Yes	No	No	No	No	Yes	Other	Sought support from colleagues/friends/family	Fear of retaliation	Unfair and biased	9
1	Group Leader	Male	White	25-35	Moderately	Very often	Seldom	Seldom	Occasionally	Very often	Very often	Seldom	Seldom	Seldom	Can't remember	Can't remember	Can't remember	Occasionally	Moderately	No	No	No	No	Yes	No	No	No	No	No	Graduate Student	Used code of silence (did not report)	Fear of retaliation		187	5
1	Department Chair	Male	White	56-65	Occasionally	Occasionally	Seldom	Occasionally	Moderately	Can't remember	Seldom	Moderately	Seldom	Can't remember	Can't remember	Occasionally	Occasionally	Very often	Moderately	No	No	No	No	No	No	No	No	No	No	Graduate Student	Sought support from colleagues/friends/family	Other	Other	185	53
1	Principal Investigator	Female	Asian	46-55	Very often	Moderately	Very often	Very often	Very often	Very often	Very often	Moderately	Very often	Very often	Very often	Moderately	Very often	Very often	Very often	Yes	Yes	Yes	Yes	Yes	Yes	Yes	Yes	No	Yes	Postdoc	Used code of silence (did not report)	Fear of being fired		187	45
1	Principal Investigator	Male	Mixed Race	56-65	Occasionally	Occasionally	Can't remember	Can't remember	Occasionally	Moderately	Seldom	Moderately	Very often	Seldom	Moderately	Moderately	Seldom	Occasionally	Occasionally	Yes	No	Yes	No	Yes	No	No	No	No	Yes	Graduate Student	Reported to my institution/body responsible for your institution	Fear of retaliation	Unfair and biased	187	14
1	Principal Investigator	Female	Asian	36-45	Very often	Can't remember	Moderately	Very often	Very often	Moderately	Very often	Very often	Can't remember	Very often	Very often	Very often	Very often	Can't remember	Moderately	No	No	No	No	No	Yes	No	No	No	No	Graduate Student	Reported to my institution/body responsible for your institution		Unfair and biased	187	33
1	Department Chair	Female	White	56-65	Occasionally	Occasionally	Can't remember	Seldom	Moderately	Moderately	Occasionally	Moderately	Very often	Moderately	Moderately	Can't remember	Occasionally	Can't remember	Very often	No	No	No	No	Yes	No	No	No	No	No	Other	Reported to my institution/body responsible for your institution		Unfair and biased	187	36
1	Department Chair	Female	White	56-65	Moderately	Seldom	Can't remember	Can't remember	Very often	Very often	Seldom	Moderately	Moderately	Very often	Very often	Very often	Seldom	Very often	Very often	Yes	No	Yes	No	Yes	Yes	Yes	Yes	Yes	Yes	Other	Sought support from colleagues/friends/family	Fear of retaliation	Unfair and biased	187	18
1	Principal Investigator	Male	White	56-65	Occasionally	Can't remember	Occasionally	Moderately	Moderately	Very often	Occasionally	Can't remember	Can't remember	Occasionally	Very often	Can't remember	Very often	Very often	Very often	Yes	No	No	Yes	Yes	Yes	Yes	Yes	Yes	Yes	Other	Reported to my institution/body responsible for your institution		Unfair and biased	187	34
1	Group Leader	Female	White	46-55	Seldom	Can't remember	Can't remember	Can't remember	Moderately	Moderately	Moderately	Very often	Can't remember	Can't remember	Seldom	Occasionally		Can't remember	Occasionally	Yes	No	No	Yes	Yes	No	No	No	No	Yes	Graduate Student	Sought support from colleagues/friends/family	Fear of retaliation		187	45
1	Department Chair	Male	White	46-55	Very often	Very often	Seldom	Occasionally	Seldom	Very often	Seldom	Seldom	Seldom	Seldom	Seldom	Can't remember	Seldom	Can't remember	Seldom	Yes	No	No	No	Yes	No	No	No	No	Yes	Other	Reported to my institution/body responsible for your institution		Unfair and biased	187	49
1	Principal Investigator	Male	Asian	46-55	Moderately	Very often	Occasionally	Can't remember	Can't remember	Seldom	Moderately	Can't remember	Can't remember	Can't remember	Can't remember	Can't remember	Moderately	Occasionally	Can't remember	No	No	No	No	No	No	No	No	No	No	Postdoc	Used code of silence (did not report)	Fear of retaliation
1	Principal Investigator	Male	White	25-35	Can't remember	Moderately	Can't remember	Occasionally	Occasionally	Can't remember	Can't remember	Can't remember	Can't remember	Can't remember	Can't remember	Can't remember	Can't remember	Moderately	Can't remember	No	No	Yes	Yes	No	Yes	No	No	No	Yes	Graduate Student	Sought support from colleagues/friends/family	Other		187	22
1	Principal Investigator	Male	White	46-55	Seldom	Occasionally	Occasionally	Can't remember	Occasionally	Occasionally	Occasionally	Occasionally	Very often	Moderately	Moderately	Seldom	Moderately	Moderately	Moderately	No	No	No	No	No	No	No	No	No	No	Graduate Student	Sought support from colleagues/friends/family	Other		187	22
1	Principal Investigator	Male	White	36-45	Occasionally	Occasionally	Can't remember	Can't remember	Can't remember	Occasionally	Occasionally	Moderately	Can't remember	Can't remember	Moderately	Can't remember	Occasionally	Occasionally	Occasionally	No	No	No	No	No	No	No	No	No	No	Postdoc	Used code of silence (did not report)	Fear of retaliation
1	Lab Supervisor	Male	White	36-45	Occasionally	Occasionally	Seldom	Can't remember	Occasionally	Occasionally	Occasionally	Seldom	Can't remember	Moderately	Seldom	Occasionally	Moderately	Moderately	Can't remember	No	No	No	No	No	No	Yes	No	No	No	Graduate Student	Used code of silence (did not report)	Fear of retaliation		65
1	Lab Supervisor	Male	White0	56-65	Can't remember	Can't remember	Can't remember	Can't remember	Can't remember	Occasionally	Can't remember	Occasionally	Can't remember	Can't remember	Occasionally	Can't remember	Can't remember	Can't remember	Seldom	Yes	No	No	No	No	Yes	Yes	No	No	No	Visiting Scientist/Researcher	Reported to my institution/body responsible for your institution		Other
1	Lab Supervisor	Male	Asian	36-45	Moderately	Occasionally	Very often	Occasionally	Occasionally	Occasionally	Occasionally	Occasionally	Can't remember	Can't remember	Can't remember	Occasionally	Seldom	Seldom	Can't remember	No	No	No	No	No	Yes	No	No	No	No	Graduate Student	Sought support from colleagues/friends/family	Fear of retaliation		61
1	Department Chair	Female	White	46-55	Very often	Occasionally	Can't remember	Seldom	Moderately	Moderately	Very often	Occasionally	Occasionally	Can't remember	Seldom	Can't remember	Seldom	Seldom	Seldom	No	No	No	Yes	No	Yes	Yes	No	No	No	Other	Sought support from colleagues/friends/family	Fear of being fired	Unfair and biased	161
1	Principal Investigator	Female	Asian	36-45	Occasionally	Very often	Seldom	Seldom	Moderately	Very often	Moderately	Moderately	Moderately	Occasionally	Can't remember	Moderately	Seldom	Seldom	Seldom	No	No	Yes	No	No	No	No	No	No	Yes	Graduate Student	Used code of silence (did not report)	Fear of retaliation		75
1	Principal Investigator	Male	White	36-45	Occasionally	Occasionally	Can't remember	Seldom	Occasionally	Can't remember	Seldom	Seldom	Can't remember	Can't remember	Can't remember	Can't remember	Seldom	Moderately	Seldom	No	No	No	No	No	No	No	No	No	No	Graduate Student	Sought support from colleagues/friends/family	Fear of retaliation	Other	185
1	Group Leader	Male	White	56-65	Very often	Moderately	Moderately	Very often	Moderately	Very often	Moderately	Occasionally	Very often	Moderately	Very often	Moderately	Very often	Occasionally	Moderately	Yes	No	Yes	Yes	Yes	Yes	Yes	No	Yes	Yes	Postdoc	Reported to my institution/body responsible for your institution	Fear of retaliation	Unfair and biased	168
1	Lab Supervisor	Male	White	56-65	Moderately	Can't remember	Occasionally	Can't remember	Can't remember	Moderately	Moderately	Can't remember	Can't remember	Moderately	Moderately	Can't remember	Occasionally	Can't remember	Can't remember	No	No	No	No	Yes	Yes	Yes	No	No	Yes	Other	Sought support from colleagues/friends/family	Other	Unfair and biased	24
1	Principal Investigator	Male	White	56-65	Moderately	Occasionally	Seldom	Can't remember	Very often	Very often	Occasionally	Seldom	Can't remember	Can't remember	Can't remember	Can't remember	Moderately	Can't remember	Can't remember	No	No	No	No	No	No	No	No	No	No	Other	Sought support from colleagues/friends/family	Fear of retaliation		161
1	Principal Investigator	Male	White	46-55	Occasionally	Very often	Can't remember	Can't remember	Very often	Very often	Very often	Very often	Can't remember	Seldom	Very often	Can't remember	Very often	Can't remember	Very often	Yes	No	No	No	No	No	No	No	No	Yes	Postdoc	Sought support from colleagues/friends/family	Fear of retaliation		65
1	Department Chair	Male	White	46-55	Can't remember	Can't remember	Can't remember	Occasionally	Can't remember	Occasionally	Can't remember	Can't remember	Can't remember	Can't remember	Can't remember	Can't remember	Occasionally	Can't remember	Moderately	No	No	No	No	Yes	No	No	No	No	No	Other	Sought support from colleagues/friends/family	Fear of retaliation	Other	10
1	Principal Investigator	Male	White	36-45	Seldom	Moderately	Can't remember	Seldom	Seldom	Very often	Seldom	Occasionally	Can't remember	Moderately	Moderately	Occasionally	Moderately	Moderately	Moderately	Yes	No	No	Yes	Yes	Yes	No	Yes	No	Yes	Other	Reported to my institution/body responsible for your institution		Unfair and biased	187	10
1	Department Chair	Male	White	46-55	Occasionally	Can't remember	Can't remember	Can't remember	Can't remember	Occasionally	Can't remember	Can't remember	Can't remember	Can't remember	Occasionally	Can't remember	Can't remember	Can't remember	Can't remember	Yes	No	No	No	No	No	No	No	No	Yes	Visiting Scientist/Researcher	Sought support from colleagues/friends/family	Other		185
1	Principal Investigator	Male	White	36-45	Occasionally	Can't remember	Can't remember	Can't remember	Can't remember	Occasionally	Occasionally	Can't remember	Can't remember	Can't remember	Can't remember	Can't remember	Can't remember	Can't remember	Can't remember	No	No	No	No	No	No	No	No	No	No	Graduate Student	Other	Fear of retaliation		187	22
1	Principal Investigator	Female	White	36-45	Occasionally	Moderately	Seldom	Moderately	Very often	Moderately	Moderately	Very often	Very often	Very often	Very often	Very often	Very often	Very often	Very often	Yes	No	No	Yes	Yes	Yes	Yes	No	Yes	Yes	Postdoc	Reported to my institution/body responsible for your institution	Other	Unfair and biased	65
1	Department Chair	Female	Asian	25-35	Moderately	Occasionally	Occasionally	Moderately	Very often	Occasionally	Seldom	Moderately	Can't remember	Can't remember	Can't remember	Can't remember	Can't remember	Can't remember	Seldom	No	No	No	No	Yes	No	No	No	No	No	Other	Sought support from colleagues/friends/family	Fear of retaliation	Other	187	22
1	Principal Investigator	Male	White	46-55	Occasionally	Seldom	Seldom	Can't remember	Very often	Occasionally	Occasionally	Can't remember	Very often	Can't remember	Can't remember	Can't remember	Can't remember	Can't remember	Can't remember	No	No	No	No	No	No	No	No	No	No	Graduate Student	Sought support from colleagues/friends/family	Fear of retaliation		187
1	Group Leader	Female	White	56-65	Very often	Very often	Very often	Occasionally	Moderately	Very often	Moderately	Occasionally	Can't remember	Can't remember	Can't remember	Can't remember	Seldom	Occasionally	Can't remember	Yes	No	No	Yes	Yes	No	Yes	No	No	Yes	Other	Sought support from colleagues/friends/family	Fear of retaliation		187	4
1	Group Leader	Female	Asian	56-65	Seldom	Seldom	Seldom	Occasionally	Occasionally	Occasionally	Can't remember	Seldom	Can't remember	Can't remember	Moderately	Can't remember	Occasionally	Occasionally	Moderately	No	No	Yes	Yes	No	Yes	Yes	Yes	Yes	No	Visiting Scientist/Researcher	Used code of silence (did not report)	Fear of retaliation	Other	172
1	Principal Investigator	Male	White	56-65	Very often	Very often	Moderately	Very often	Very often	Very often	Very often	Very often	Seldom	Seldom	Very often	Seldom	Very often	Very often	Very often	Yes	Yes	No	Yes	Yes	No	No	Yes	No	Yes	Other	Other	Other	Unfair and biased	137
1	Group Leader	Male	White	46-55	Moderately	Can't remember	Can't remember	Very often	Can't remember	Very often	Can't remember	Can't remember	Moderately	Can't remember	Very often	Can't remember	Very often	Occasionally	Seldom	Yes	No	No	Yes	Yes	No	No	No	No	Yes	Postdoc	Sought support from colleagues/friends/family	Fear of retaliation	Other	65
1	Principal Investigator	Female	White	36-45	Moderately	Occasionally	Moderately	Can't remember	Occasionally	Can't remember	Seldom	Can't remember	Seldom	Can't remember	Can't remember	Occasionally	Can't remember	Moderately	Occasionally	No	No	Yes	No	No	No	No	No	No	No	Graduate Student	Used code of silence (did not report)	Fear of retaliation		187	33
1	Department Chair	Female	White	56-65	Moderately	Very often	Moderately	Very often	Very often	Very often	Very often	Very often	Very often	Very often	Very often	Very often	Very often	Very often	Very often	No	No	No	No	Yes	Yes	No	No	Yes	Yes	Other	Reported to my institution/body responsible for your institution		Other	187	5
1	Department Chair	Male	White	56-65	Can't remember	Can't remember	Can't remember	Can't remember	Can't remember	Can't remember	Can't remember	Moderately	Occasionally	Can't remember	Very often	Occasionally	Very often	Moderately	Moderately	No	No	No	Yes	Yes	No	No	Yes	No	No	Graduate Student	Reported to my institution/body responsible for your institution		Fair and unbiased	187	21
1	Department Chair	Male	East Indian	Over 66	Occasionally	Occasionally	Can't remember	Moderately	Can't remember	Very often	Very often	Very often	Moderately	Moderately	Can't remember	Can't remember	Occasionally	Very often	Very often	Yes	No	No	Yes	Yes	No	No	No	No	No	Other	Other	Other	Other	182
1	Principal Investigator	Male	White	46-55	Seldom	Very often	Seldom	Can't remember	Very often	Moderately	Very often	Occasionally	Occasionally	Can't remember	Very often	Can't remember	Very often	Occasionally	Very often	Yes	Yes	Yes	Yes	No	Yes	Yes	No	No	Yes	Graduate Student	Used code of silence (did not report)	Other	Other	187	14
1	Group Leader	Male	White	46-55	Can't remember	Occasionally	Can't remember	Very often	Seldom	Moderately	Moderately	Occasionally	Moderately	Seldom	Very often	Can't remember	Very often	Occasionally	Seldom	Yes	No	No	Yes	Yes	No	No	No	No	Yes	Visiting Scientist/Researcher	Other	Fear of retaliation	Other	65
1	Principal Investigator	Male	East Indian	Over 66	Seldom	Very often	Very often	Very often	Seldom	Occasionally	Occasionally	Seldom	Can't remember	Very often	Occasionally	Can't remember	Very often	Seldom	Seldom	Yes	No	No	No	No	No	No	No	No	No	Postdoc	Reported to my institution/body responsible for your institution		Fair and unbiased	187	16
1	Principal Investigator	Female	Asian	36-45	Occasionally	Occasionally	Seldom	Can't remember	Moderately	Can't remember	Occasionally	Moderately	Very often	Occasionally	Seldom	Moderately	Moderately	Very often	Moderately	Yes	No	Yes	Yes	No	No	Yes	No	No	Yes	Graduate Student	Sought support from colleagues/friends/family	Fear of retaliation		187	49
1	Group Leader	Female	White	46-55	Very often	Occasionally	Occasionally	Moderately	Very often	Moderately	Very often	Moderately	Can't remember	Can't remember	Seldom	Can't remember	Seldom	Occasionally	Seldom	No	No	No	No	Yes	No	No	No	No	No	Graduate Student	Used code of silence (did not report)	Fear of retaliation	Other	185
1	Principal Investigator	Female	White	56-65	Moderately	Moderately	Can't remember	Seldom	Seldom	Occasionally	Moderately	Moderately	Very often	Can't remember	Seldom	Occasionally	Very often	Very often	Occasionally	Yes	No	Yes	No	No	Yes	No	No	Yes	Yes	Graduate Student	Sought support from colleagues/friends/family	Other		187	33
1	Department Chair	Male	White	56-65	Can't remember	Very often	Moderately	Moderately	Occasionally	Seldom	Occasionally	Very often	Can't remember	Can't remember	Very often	Can't remember	Very often	Very often	Moderately	Yes	No	Yes	No	No	No	Yes	No	No	No	Graduate Student	Reported to my institution/body responsible for your institution		Other	187	38
1	Principal Investigator	Female	Hispanic	46-55	Seldom	Very often	Can't remember	Moderately	Can't remember	Very often	Moderately	Very often	Can't remember	Can't remember	Can't remember	Can't remember	Moderately	Can't remember	Can't remember	No	No	Yes	Yes	No	No	No	No	No	Yes	Graduate Student	Sought support from colleagues/friends/family	Fear of retaliation		187	39
1	Principal Investigator	Male	White	36-45	Moderately	Can't remember	Can't remember	Can't remember	Moderately	Moderately	Can't remember	Can't remember	Can't remember	Can't remember	Can't remember	Can't remember	Can't remember	Can't remember	Very often	No	No	No	No	Yes	No	No	No	No	No	Postdoc	Reported to my institution/body responsible for your institution		Unfair and biased	9
1	Principal Investigator	Female	White	46-55	Seldom	Can't remember	Occasionally	Can't remember	Very often	Very often	Seldom	Can't remember	Can't remember	Occasionally	Moderately	Occasionally	Moderately	Occasionally	Very often	Yes	No	Yes	Yes	No	No	No	Yes	No	Yes	Postdoc	Sought support from colleagues/friends/family	Fear of being fired	Unfair and biased	158
1	Principal Investigator	Female	White	46-55	Can't remember	Can't remember	Occasionally	Seldom	Occasionally	Seldom	Seldom	Moderately	Moderately	Can't remember	Seldom	Seldom	Occasionally	Occasionally	Seldom	No	No	Yes	No	No	No	No	No	No	No	Undergraduate Student	Sought support from colleagues/friends/family	Fear of being fired	Unfair and biased	122
1	Department Chair	Female	White	36-45	Seldom	Seldom	Seldom	Seldom	Very often	Very often	Very often	Very often	Very often	Very often	Very often	Seldom	Seldom	Seldom	Very often	No	No	No	No	Yes	Yes	Yes	No	No	No	Other	Reported to my institution/body responsible for your institution		Unfair and biased	61
1	Principal Investigator	Female	White	56-65	Occasionally	Moderately	Occasionally	Moderately	Moderately	Moderately	Moderately	Very often	Very often	Moderately	Very often	Seldom	Very often	Moderately	Very often	Yes	No	No	Yes	No	No	Yes	Yes	Yes	Yes	Other	Reported to my institution/body responsible for your institution	Fear of retaliation	Unfair and biased
1	Principal Investigator	Female	White	46-55	Occasionally	Can't remember	Can't remember	Occasionally	Very often	Seldom	Very often	Very often	Very often	Can't remember	Occasionally	Occasionally	Seldom	Can't remember	Moderately	Yes	No	No	No	No	Yes	Yes	No	No	No	Postdoc	Used code of silence (did not report)	Fear of retaliation		31
1	Group Leader	Male	White	25-35	Can't remember	Can't remember	Seldom	Can't remember	Can't remember	Seldom	Seldom	Seldom	Can't remember	Can't remember	Can't remember	Can't remember	Can't remember	Can't remember	Seldom	No	No	No	No	No	No	No	No	Yes	No	Graduate Student	Sought support from colleagues/friends/family	Other	Fair and unbiased	2
1	Principal Investigator	Male	White	46-55	Occasionally	Occasionally	Occasionally	Moderately	Seldom	Very often	Occasionally	Occasionally	Occasionally	Seldom	Seldom	Occasionally	Seldom	Occasionally	Occasionally	Yes	No	Yes	No	Yes	No	No	No	No	No	Graduate Student	Sought support from colleagues/friends/family	Fear of retaliation	Unfair and biased	187	21
1	Department Chair	Female	White	56-65	Can't remember	Can't remember	Can't remember	Can't remember	Can't remember	Moderately	Can't remember	Can't remember	Can't remember	Moderately	Seldom	Can't remember	Seldom	Can't remember	Can't remember	Yes	No	No	No	Yes	No	No	No	No	Yes	Other	Sought support from colleagues/friends/family		Fair and unbiased	31
1	Principal Investigator	Male	Asian	36-45	Moderately	Very often	Moderately	Occasionally	Very often	Very often	Seldom	Very often	Very often	Moderately	Very often	Moderately	Very often	Very often	Very often	Yes	No	No	Yes	Yes	Yes	Yes	No	Yes	Yes	Graduate Student	Reported to my institution/body responsible for your institution	Fear of retaliation	Unfair and biased	187	22
1	Principal Investigator	Male	White	36-45	Occasionally		Moderately	Occasionally	Can't remember	Moderately	Occasionally	Moderately	Can't remember	Occasionally	Moderately	Can't remember	Moderately	Occasionally	Very often	No	No	No	No	Yes	Yes	Yes	No	No	Yes	Postdoc	Used code of silence (did not report)	Fear of retaliation		9
1	Department Chair	Female	White	56-65	Occasionally	Very often	Occasionally	Very often	Can't remember	Moderately	Seldom	Occasionally	Can't remember	Can't remember	Can't remember	Can't remember	Seldom	Occasionally	Occasionally	Yes	No	No	Yes	Yes	No	No	No	No	Yes	Graduate Student	Sought support from colleagues/friends/family	Fear of retaliation		187	17
1	Lab Supervisor	Female	East Indian	46-55	Can't remember	Can't remember	Can't remember	Can't remember	Seldom	Can't remember	Can't remember	Occasionally	Can't remember	Can't remember	Occasionally	Can't remember	Seldom	Can't remember	Seldom	No	No	No	No	No	No	Yes	No	No	No	Graduate Student	Sought support from colleagues/friends/family	Fear of retaliation		9
1	Group Leader	Female	White	25-35	Very often	Moderately	Moderately	Very often	Very often	Very often	Very often	Very often	Very often	Very often	Very often	Very often	Very often	Very often	Very often	Yes	No	Yes	No	Yes	Yes	Yes	No	Yes	Yes	Postdoc	Used code of silence (did not report)	Fear of retaliation	Unfair and biased	187	22
1	Principal Investigator	Female	White	Over 66	Can't remember	Occasionally	Seldom	Very often	Moderately	Can't remember	Very often	Can't remember	Moderately	Can't remember	Seldom	Can't remember	Occasionally	Occasionally	Can't remember	No	No	No	Yes	No	No	No	No	No	Yes	Graduate Student	Sought support from colleagues/friends/family	Fear of retaliation	Other	187	5
1	Principal Investigator	Male	White	46-55	Can't remember	Seldom	Can't remember	Can't remember	Occasionally	Occasionally	Can't remember	Seldom	Moderately	Can't remember	Moderately	Seldom	Occasionally	Moderately	Can't remember	No	No	Yes	Yes	No	No	Yes	No	No	No	Graduate Student	Sought support from colleagues/friends/family	Fear of retaliation
1	Principal Investigator	Female	Asian	36-45	Very often	Occasionally	Occasionally	Moderately	Occasionally	Very often	Can't remember	Can't remember	Can't remember	Can't remember	Very often	Occasionally	Moderately	Very often	Occasionally	Yes	No	No	No	Yes	No	No	No	Yes	Yes	Postdoc	Used code of silence (did not report)	Fear of being fired	Other	187	45
1	Group Leader	Male	Asian	46-55	Moderately	Very often	Very often	Occasionally	Very often	Very often	Very often	Very often	Seldom	Occasionally	Moderately	Very often	Very often	Moderately	Very often	Yes	No	No	No	Yes	No	Yes	No	No	Yes	Other	Used code of silence (did not report)	Fear of retaliation	Unfair and biased	79
1	Principal Investigator	Male	Asian	25-35	Occasionally	Very often	Moderately	Moderately	Very often	Very often	Very often	Very often	Moderately	Occasionally	Very often	Occasionally	Very often	Very often	Very often	No	No	No	Yes	Yes	Yes	Yes	No		Yes	Visiting Scientist/Researcher	Used code of silence (did not report)	Fear of retaliation		187	10
1	Department Chair	Female	White	Over 66	Very often	Very often	Very often	Very often	Very often	Very often	Very often	Very often	Very often	Very often	Very often	Very often	Very often	Very often	Very often	Yes	No	No	No	Yes	No	No	No	No	Yes	Other	Reported to my institution/body responsible for your institution	Other	Unfair and biased	187	5
1	Department Chair	Male	White	46-55	Moderately	Moderately	Very often	Moderately	Occasionally	Very often	Very often	Occasionally	Moderately	Moderately	Occasionally	Seldom	Very often	Very often	Very often	Yes	No	No	Yes	Yes	No	No	Yes	No	Yes	Other	Reported to my institution/body responsible for your institution	Fear of retaliation	Unfair and biased	187	45
1	Principal Investigator	Male	Asian	46-55	Very often	Very often	Seldom	Moderately	Very often	Very often	Seldom	Very often	Seldom	Seldom	Moderately	Seldom	Moderately	Moderately	Seldom	No	No	No	Yes	Yes	No	No	No	No	Yes	Graduate Student	Sought support from colleagues/friends/family	Fear of being fired	Unfair and biased	31
1	Group Leader	Male	White	56-65	Seldom	Seldom	Seldom	Can't remember	Can't remember	Moderately	Occasionally	Moderately	Occasionally	Occasionally	Occasionally	Can't remember	Can't remember	Very often	Very often	Yes	No	No	Yes	Yes	No	No	No	No	Yes	Graduate Student	Sought support from colleagues/friends/family	Fear of retaliation	Unfair and biased	9
1	Principal Investigator	Female	White	46-55	Very often	Very often	Occasionally	Occasionally	Occasionally	Moderately	Very often	Seldom	Can't remember	Can't remember	Can't remember	Moderately	Very often	Very often	Very often	No	No	Yes	No	No	No	No	No	No	No	Postdoc	Used code of silence (did not report)	Visa issues		187	39
1	Principal Investigator	Male	White	46-55	Occasionally	Seldom	Seldom	Seldom	Seldom	Moderately	Occasionally	Occasionally	Seldom	Moderately	Moderately	Moderately	Seldom	Moderately	Can't remember	No	No	Yes	Yes	Yes	No	Yes	No	No	Yes	Postdoc	Used code of silence (did not report)	Fear of retaliation		24
1	Principal Investigator	Female	White	56-65	Very often	Moderately	Seldom	Can't remember	Occasionally	Occasionally	Very often	Occasionally	Moderately	Very often	Very often	Can't remember	Occasionally	Very often	Very often	No	No	No	No	No	Yes	Yes	No	No	No	Postdoc	Sought support from colleagues/friends/family	Fear of retaliation		17
1	Principal Investigator	Female	White	36-45	Very often	Very often	Can't remember	Very often	Occasionally	Very often	Very often	Can't remember	Very often	Can't remember	Very often	Occasionally	Very often	Very often	Very often	No	No	No	No	Yes	Yes	Yes	Yes	Yes	Yes	Other	Reported to my institution/body responsible for your institution		Unfair and biased	31
1	Group Leader	Male	White	46-55	Can't remember	Can't remember	Can't remember	Can't remember	Seldom	Occasionally	Occasionally	Can't remember	Can't remember	Can't remember	Can't remember	Can't remember	Can't remember	Occasionally	Seldom	No	No	No	No	No	No	Yes	No	No	No	Postdoc	Used code of silence (did not report)	Fear of retaliation	Fair and unbiased	9
1	Department Chair	Male	White	46-55	Very often	Moderately	Moderately	Occasionally	Occasionally	Occasionally	Seldom	Occasionally	Moderately	Moderately	Moderately	Seldom	Moderately	Very often	Moderately	No	No	No	Yes	No	Yes	No	No	No	Yes	Postdoc	Reported to my institution/body responsible for your institution	Other	Fair and unbiased
1	Group Leader	Male	White	46-55	Can't remember	Occasionally	Can't remember	Occasionally	Can't remember	Can't remember	Occasionally	Moderately	Occasionally	Can't remember	Seldom	Seldom	Occasionally	Occasionally	Can't remember	No	No	No	No	No	No	No	No	No	No	Graduate Student	Sought support from colleagues/friends/family	Fear of retaliation		17
1	Department Chair	Other genders	Asian	36-45	Moderately	Can't remember	Can't remember	Seldom	Occasionally	Very often	Can't remember	Can't remember	Very often		Seldom	Can't remember	Moderately	Can't remember	Can't remember	Yes	No	No	No	Yes	No	Yes	No	No	No	Other	Used code of silence (did not report)	Other		172
1	Lab Supervisor	Male	Middle Eastern	46-55	Very often	Very often	Can't remember	Moderately	Can't remember	Can't remember	Can't remember	Can't remember	Very often	Very often	Very often	Very often	Very often	Very often	Very often	Yes	No	No	No	Yes	No	No	No	Yes	Yes	Other	Used code of silence (did not report)	Fear of retaliation	Unfair and biased	179
1	Department Chair	Male	American Indian or Alaska Native	36-45	Moderately	Moderately	Seldom	Can't remember	Moderately	Moderately	Occasionally	Seldom	Very often	Seldom	Moderately	Very often	Moderately	Can't remember	Moderately	No	No	No	Yes	Yes	Yes	No	No	No	No	Visiting Scientist/Researcher	Sought support from colleagues/friends/family	Fear of being fired	Other	122
1	Principal Investigator	Female	White	36-45	Can't remember	Moderately	Seldom	Seldom	Occasionally	Can't remember	Seldom	Seldom	Occasionally	Occasionally	Occasionally	Moderately	Occasionally	Occasionally	Occasionally	No	No	Yes	Yes	No	Yes	Yes	No	No	Yes	Postdoc	Used code of silence (did not report)	Fear of retaliation		185
1	Principal Investigator	Male	White	Over 66	Occasionally	Can't remember	Seldom	Occasionally	Moderately	Can't remember	Can't remember	Occasionally	Can't remember	Can't remember	Can't remember	Can't remember	Seldom	Moderately	Can't remember		No	Yes	Yes	No	No	No	No	No	Yes	Graduate Student	Sought support from colleagues/friends/family	Other	Other	187
1	Principal Investigator	Male	White	46-55	Moderately	Moderately	Occasionally	Moderately	Very often	Occasionally	Occasionally	Occasionally	Occasionally	Can't remember	Seldom	Seldom	Very often	Moderately	Occasionally	No	No	No	Yes	Yes	Yes	Yes	No	Yes	Yes	Postdoc	Used code of silence (did not report)	Fear of retaliation	Unfair and biased	185	53
1	Lab Supervisor	Male	White	36-45	Occasionally	Can't remember	Occasionally	Can't remember	Occasionally	Occasionally	Occasionally	Can't remember	Occasionally	Can't remember	Can't remember	Can't remember	Can't remember	Can't remember	Can't remember	No	No	No	No	Yes	No	No	No	No	No	Graduate Student	Sought support from colleagues/friends/family	Fear of retaliation		9
1	Principal Investigator	Male	White	36-45	Occasionally	Moderately	Occasionally	Occasionally	Can't remember	Can't remember	Very often	Very often	Moderately	Can't remember	Very often	Can't remember	Very often	Very often	Very often	Yes	No	Yes	No	No	No	No	No	No	Yes		Reported to my institution/body responsible for your institution		Other	161
1	Principal Investigator	Male	White	46-55	Very often	Very often	Very often	Very often	Very often	Moderately	Moderately	Very often	Very often	Very often	Very often	Very often	Very often	Very often	Occasionally	Yes	No	No	No	Yes	Yes	Yes	No	No	Yes	Postdoc	Reported to my institution/body responsible for your institution		Unfair and biased	65
1	Lab Supervisor	Female	Hispanic	36-45	Very often	Occasionally	Can't remember	Occasionally	Very often	Seldom	Occasionally	Very often	Seldom	Can't remember	Seldom	Moderately	Seldom	Very often	Occasionally	No	No	Yes	Yes	No	Yes	Yes	No	No	Yes	Graduate Student	Reported to my institution/body responsible for your institution	Fear of retaliation	Unfair and biased	187	45
1	Department Chair	Male		36-45	Very often	Very often	Can't remember	Very often	Very often	Very often	Very often	Very often	Occasionally	Very often	Moderately	Very often	Moderately	Very often	Very often			Yes	Yes	Yes			Yes			Graduate Student	Other	Fear of retaliation	Other	31
1	Department Chair	Male	White	36-45	Moderately	Seldom	Occasionally	Moderately	Moderately	Moderately	Very often	Moderately	Moderately	Moderately	Moderately	Seldom	Very often	Very often	Very often	No	No	No	No	Yes	Yes	Yes	No	Yes	Yes	Other	Used code of silence (did not report)	Fear of retaliation		187	26
1	Principal Investigator	Male	White	36-45	Occasionally	Seldom	Can't remember	Seldom	Occasionally	Can't remember	Seldom	Seldom	Occasionally	Seldom	Moderately	Can't remember	Moderately	Occasionally	Can't remember	No	No	No	No	No	Yes	Yes	No	Yes	No	Postdoc	Sought support from colleagues/friends/family	Fear of retaliation		84
1	Principal Investigator	Male	White	46-55	Moderately	Moderately	Seldom		Moderately	Very often	Very often	Occasionally	Very often	Very often	Very often	Very often	Moderately	Seldom	Seldom	No	No	Yes	Yes	No	No	Yes	No	No	Yes	Graduate Student	Reported to my institution/body responsible for your institution		Fair and unbiased	187	33
1	Principal Investigator	Male	Asian	56-65	Very often	Very often	Moderately	Moderately	Occasionally	Seldom	Moderately	Very often	Seldom	Seldom	Moderately	Moderately	Very often	Occasionally	Occasionally	Yes	No	Yes	Yes	No	No	Yes	No	No	Yes	Postdoc	Sought support from colleagues/friends/family	Fear of retaliation	Other	187	23
1	Principal Investigator	Female	White	36-45	Occasionally	Very often	Very often	Very often	Very often	Moderately	Very often	Occasionally	Very often	Moderately	Very often	Seldom	Very often	Very often	Very often	Yes	No	No	Yes	No	No	Yes	No	No	Yes	Postdoc	Sought support from colleagues/friends/family	Fear of being fired		185
1	Principal Investigator	Male	White	56-65	Very often	Very often	Very often	Very often	Very often	Very often	Very often	Very often	Very often	Very often	Very often	Very often	Very often	Very often	Very often	Yes	No	Yes	No	Yes	Yes	Yes	No	Yes	Yes	Postdoc	Used code of silence (did not report)	Fear of retaliation		163
1	Principal Investigator	Female	White	56-65	Occasionally	Occasionally	Occasionally	Occasionally	Can't remember	Seldom	Occasionally	Can't remember	Moderately	Moderately	Occasionally	Can't remember	Can't remember	Seldom	Occasionally	No	No	No	Yes	No	No	No	No	No	Yes	Visiting Scientist/Researcher	Used code of silence (did not report)	Other		187	39
1	Principal Investigator	Female	Asian	36-45	Occasionally	Very often	Occasionally	Very often	Very often	Very often	Moderately	Very often	Moderately	Moderately	Occasionally	Seldom	Moderately	Moderately	Moderately	No	No	Yes	Yes	No	Yes	Yes	No	Yes	Yes	Graduate Student	Used code of silence (did not report)	Fear of retaliation		187	39
1	Principal Investigator	Male	White	36-45	Seldom	Seldom	Can't remember	Occasionally	Can't remember	Occasionally	Occasionally	Can't remember	Occasionally	Can't remember	Can't remember	Can't remember	Occasionally	Can't remember	Occasionally	Yes	No	No	No	Yes	No	No	No	No	Yes	Other	Used code of silence (did not report)	Fear of retaliation		187	17
1	Department Chair	Male	White	36-45	Seldom	Seldom	Occasionally	Occasionally	Occasionally	Occasionally	Occasionally	Occasionally	Very often	Can't remember	Occasionally	Seldom	Occasionally	Seldom	Seldom	No	No	No	No	No	Yes	No	No	No	Yes		Reported to my institution/body responsible for your institution		Other	9
1	Principal Investigator	Male	White0	56-65	Can't remember	Can't remember	Can't remember	Can't remember	Seldom	Can't remember	Can't remember	Can't remember	Very often		Very often	Seldom	Very often	Very often	Very often		No	No	No	No		Yes			No	Postdoc	Used code of silence (did not report)	Fear of retaliation		187	22
1	Department Chair	Female	White	36-45	Can't remember	Can't remember	Occasionally	Can't remember	Moderately	Very often	Occasionally	Moderately	Occasionally	Can't remember	Seldom	Moderately	Moderately	Can't remember	Can't remember	Yes	No	No	No	Yes	No	No	No	No	No	Graduate Student	Used code of silence (did not report)	Fear of retaliation	Other	187	45
1	Department Chair	Male	Hispanic	46-55	Moderately	Very often	Can't remember	Occasionally	Moderately	Moderately	Moderately	Very often	Can't remember	Can't remember	Very often	Can't remember	Occasionally	Can't remember	Can't remember					Yes				Yes	Yes	Other	Reported to my institution/body responsible for your institution		Other	187	34
1	Principal Investigator	Female	American Indian or Alaska Native	46-55	Seldom	Can't remember	Can't remember	Can't remember	Can't remember	Occasionally	Can't remember	Can't remember	Very often	Can't remember	Occasionally	Can't remember	Very often	Very often	Seldom	Yes	Yes	Yes	Yes	Yes	Yes	Yes	Yes	Yes	Yes	Postdoc	Used code of silence (did not report)	Fear of retaliation	Unfair and biased
1	Principal Investigator	Male	White	46-55	Very often	Moderately	Very often	Very often	Moderately	Very often	Very often	Very often	Moderately	Can't remember	Seldom	Can't remember	Very often	Very often	Very often	Yes	Yes	No	Yes	No	No	No	No	No	Yes	Graduate Student	Reported to my institution/body responsible for your institution		Unfair and biased	122
1	Lab Supervisor	Female	White	36-45	Can't remember	Can't remember	Can't remember	Can't remember	Moderately	Occasionally	Can't remember	Occasionally	Occasionally	Seldom	Seldom	Occasionally	Can't remember	Seldom	Can't remember	Yes	No	No	No	No	No	No	No	No	Yes	Graduate Student	Sought support from colleagues/friends/family	Fear of retaliation	Other	187	10
1	Principal Investigator	Male	White	36-45	Very often	Occasionally	Occasionally	Seldom	Very often	Can't remember	Moderately	Moderately	Seldom	Seldom	Can't remember	Very often	Very often	Very often	Moderately	No	No	No	Yes	No	No	No	No	No	Yes	Postdoc	Other	Other		187	33
1	Department Chair	Female	Asian	25-35	Very often	Seldom	Very often	Can't remember	Very often	Very often	Occasionally	Occasionally	Very often	Very often	Very often	Very often	Very often	Very often	Very often	No	No	No	No	No	No	No	No	No	No	Postdoc	Sought support from colleagues/friends/family	Other	Unfair and biased	185
1	Lab Supervisor	Male	White	56-65	Moderately	Very often	Can't remember	Can't remember	Very often	Very often	Can't remember	Very often	Very often	Very often	Very often	Very often	Very often	Very often	Very often	Yes	No	Yes	No	Yes	Yes	Yes	No	Yes	Yes	Graduate Student	Reported to my institution/body responsible for your institution	Other	Other	185
1	Department Chair	Female	Mixed Race	25-35	Very often	Very often	Very often	Very often	Very often	Very often	Very often	Very often	Very often	Seldom	Seldom	Very often	Very often	Very often	Very often	No	No	No	No	No	No	No	No	No	Yes	Graduate Student	Reported to my institution/body responsible for your institution		Unfair and biased	185
1	Principal Investigator	Female	White0	46-55	Seldom	Occasionally	Seldom	Occasionally	Moderately	Moderately	Moderately	Moderately	Can't remember	Seldom	Seldom	Seldom	Moderately	Very often	Very often	Yes	No	No	No	Yes	No	Yes	No	No	No	Postdoc	Sought support from colleagues/friends/family	Fear of retaliation		187	5
1	Principal Investigator	Female	White	46-55	Occasionally	Moderately	Seldom	Occasionally	Very often	Very often	Occasionally	Very often	Very often	Occasionally	Very often	Very often	Very often	Very often	Very often	Yes	No	No	Yes	No	Yes	Yes	Yes	Yes	No	Graduate Student	Reported to my institution/body responsible for your institution		Fair and unbiased	187	33
1	Lab Supervisor	Female	White	25-35	Occasionally	Occasionally	Moderately	Can't remember	Seldom	Very often	Seldom	Very often	Moderately	Moderately	Very often	Seldom	Very often	Very often	Very often	Yes	No	Yes	No	No	Yes	No	No	No	No	Other	Reported to my institution/body responsible for your institution		Unfair and biased	187	6
1	Principal Investigator	Male	Hispanic	Over 66	Can't remember	Can't remember	Seldom	Can't remember	Very often	Moderately	Can't remember	Can't remember	Seldom	Can't remember	Can't remember	Can't remember	Seldom	Can't remember	Can't remember	No	No	Yes	No	No	No	No	No	No	No	Graduate Student	Used code of silence (did not report)	Fear of retaliation	Unfair and biased	187	11
1	Department Chair	Male	White	56-65	Occasionally	Occasionally	Very often	Very often	Very often	Very often	Very often	Can't remember	Can't remember	Can't remember	Can't remember	Can't remember	Occasionally	Can't remember	Very often	Yes	No	No	Yes	Yes	No	Yes	No	No	Yes	Other	Reported to my institution/body responsible for your institution		Unfair and biased	185
1	Principal Investigator	Female	Middle Eastern	56-65	Very often	Can't remember	Can't remember	Very often	Very often	Very often	Seldom	Can't remember	Can't remember	Very often	Can't remember	Occasionally	Can't remember	Can't remember	Can't remember	Yes	Yes	No	Yes	Yes	No	No	No	No	Yes	Postdoc	Reported to my institution/body responsible for your institution		Other	187	36
1	Principal Investigator	Male	White	46-55	Seldom	Occasionally	Can't remember	Can't remember	Very often	Occasionally	Occasionally	Moderately	Very often	Can't remember	Can't remember	Can't remember	Can't remember	Very often	Very often	Yes	No	Yes	No	No	No	Yes	No	No	Yes	Visiting Scientist/Researcher	Used code of silence (did not report)	Fear of retaliation		187	22
1	Principal Investigator
1	Principal Investigator	Male	Asian	56-65	Occasionally	Can't remember	Very often	Occasionally	Very often	Occasionally	Very often	Very often	Very often	Seldom	Seldom	Seldom	Occasionally	Very often	Very often	No	No	Yes	No	Yes	Yes	No	No	No	No	Graduate Student	Used code of silence (did not report)	Fear of retaliation		78
1	Principal Investigator	Female	Hispanic	46-55	Very often	Very often	Seldom	Can't remember	Very often	Very often	Very often	Seldom	Seldom	Occasionally	Occasionally	Occasionally	Moderately	Very often	Moderately	No	No	Yes	Yes	No	No	No	No	No	Yes	Graduate Student	Sought support from colleagues/friends/family	Fear of retaliation		187	10
1	Principal Investigator	Male	White	36-45	Moderately	Moderately	Moderately	Occasionally	Occasionally	Very often	Seldom	Occasionally	Very often	Occasionally	Moderately	Can't remember	Very often	Moderately	Moderately	Yes	No	No	Yes	Yes	Yes	Yes	Yes	No	Yes	Other	Reported to my institution/body responsible for your institution	Fear of retaliation	Unfair and biased	187	14
1	Lab Supervisor	Male	White	36-45	Seldom	Occasionally	Occasionally	Can't remember	Can't remember	Seldom	Can't remember	Can't remember	Can't remember	Can't remember	Can't remember	Seldom	Moderately	Can't remember	Can't remember	No	No	No	No	No	No	No	No	No	No	Graduate Student	Sought support from colleagues/friends/family	Other		187	14
1	Department Chair	Male	White	25-35	Very often	Can't remember	Very often	Very often	Can't remember	Very often	Very often	Can't remember	Can't remember	Can't remember	Very often	Very often	Very often	Can't remember	Can't remember	No	No	No	No	Yes	Yes	Yes	No	No	No	Graduate Student	Other	Fear of being fired	Unfair and biased	187	22
1	Principal Investigator	Male	White	46-55	Very often	Seldom	Can't remember	Seldom	Can't remember	Very often	Seldom	Very often	Seldom	Very often	Very often	Can't remember	Very often	Very often	Occasionally	No	No	Yes	No	No	Yes	Yes	No	Yes	No	Graduate Student	Sought support from colleagues/friends/family	Fear of retaliation	Unfair and biased	185
1	Department Chair	Female	White	36-45						Very often	Very often	Very often	Very often		Very often		Very often			Yes	No	No	Yes	Yes	No	No	No	No	Yes	Other	Sought support from colleagues/friends/family	Other	Unfair and biased	187	15
1		Male	White										Moderately			Can't remember					No		Yes	Yes					Yes	Graduate Student	Reported to my institution/body responsible for your institution	Other	Other	187
1	Principal Investigator	Female	White	46-55	Occasionally	Moderately	Can't remember	Moderately	Occasionally	Occasionally	Occasionally	Moderately	Can't remember	Can't remember	Occasionally	Very often	Moderately	Moderately	Occasionally	No	No	Yes	Yes	No	No	No	Yes	No	No	Postdoc	Sought support from colleagues/friends/family	Fear of retaliation	Other	31
1	Principal Investigator	Male	White	36-45	Moderately	Very often	Moderately	Very often	Very often	Very often	Moderately	Moderately	Very often	Can't remember	Can't remember	Can't remember	Moderately	Moderately	Moderately	No	No	Yes	No	Yes	No	No	No	No	No	Graduate Student	Sought support from colleagues/friends/family	Fear of retaliation		123
1	Principal Investigator	Male	White	Over 66	Very often	Seldom	Occasionally	Can't remember	Very often	Very often	Very often	Very often	Very often	Very often	Occasionally	Very often	Occasionally	Occasionally	Very often	Yes	No	Yes	Yes	Yes	Yes	Yes	Yes	Yes	Yes	Postdoc	Reported to my institution/body responsible for your institution		Unfair and biased
1	Principal Investigator	Male	White	46-55	Moderately	Moderately	Moderately	Moderately	Occasionally	Occasionally	Moderately	Occasionally	Seldom	Seldom	Very often	Very often	Very often	Moderately	Occasionally	No	No	Yes	No	Yes	Yes	Yes	No	Yes	No	Postdoc	Reported to my institution/body responsible for your institution	Other	Unfair and biased	185
1	Lab Supervisor	Female	White	36-45	Can't remember	Occasionally	Seldom	Occasionally	Occasionally	Occasionally	Occasionally	Seldom	Seldom	Can't remember	Occasionally	Seldom	Very often	Moderately	Occasionally	Yes	No	No	No	Yes	Yes	No	No	No	No	Postdoc	Other	Fear of retaliation		185
1	Principal Investigator	Male	White	46-55	Seldom	Seldom	Seldom	Can't remember	Can't remember	Seldom	Can't remember	Can't remember	Seldom	Can't remember	Can't remember	Can't remember	Can't remember	Can't remember	Can't remember	No	No	No	No	No	No	No	No	No	Yes	Graduate Student	Other	Other	Other	65
1	Department Chair	Male	White	36-45	Very often	Seldom	Seldom	Seldom	Very often	Very often	Very often	Very often	Very often	Very often	Seldom	Very often	Occasionally	Very often	Very often	No	No	No	No	Yes	No	No	No	No	No	Other	Sought support from colleagues/friends/family	Fear of retaliation	Unfair and biased	185
1	Group Leader	Male	White0	46-55	Occasionally	Can't remember	Occasionally	Occasionally	Can't remember	Can't remember	Seldom	Can't remember	Can't remember	Can't remember	Can't remember	Can't remember	Can't remember	Can't remember	Can't remember	No	No	No	No	No	No	No	No	No	No	Graduate Student	Used code of silence (did not report)	Fear of retaliation		185
1	Principal Investigator	Male	White	25-35	Very often	Moderately	Can't remember	Very often	Very often	Occasionally	Moderately	Can't remember	Can't remember	Can't remember	Very often	Moderately	Very often	Can't remember	Can't remember	Yes	No	No	No	Yes	No	No	No	No	No	Graduate Student	Sought support from colleagues/friends/family	Fear of retaliation		65
1	Principal Investigator	Male	White	36-45	Occasionally	Seldom	Can't remember	Seldom	Very often	Very often	Very often	Very often	Very often	Very often	Very often	Very often	Very often	Very often	Very often	No	No	No	No	No	No	Yes	No	No	No	Graduate Student	Reported to my institution/body responsible for your institution		Fair and unbiased	185
1	Lab Supervisor	Male	White	36-45	Occasionally	Moderately	Occasionally	Moderately	Very often	Moderately	Can't remember	Moderately	Moderately	Occasionally	Moderately	Very often	Very often	Moderately	Very often	No	No	No	No	No	Yes	Yes	No	Yes	Yes	Graduate Student	Reported to my institution/body responsible for your institution		Unfair and biased	122
1	Principal Investigator	Male	Asian	46-55	Very often	Very often	Very often	Very often	Very often	Very often	Very often	Very often	Moderately	Moderately	Very often	Very often	Very often	Very often	Very often	No	Yes	Yes	Yes	No	No	Yes	No	No	Yes	Postdoc	Sought support from colleagues/friends/family	Visa issues	Unfair and biased	187	1
1	Principal Investigator
1	Principal Investigator
1	Lab Supervisor	Female	White	46-55	Can't remember	Can't remember	Can't remember	Can't remember	Can't remember	Occasionally		Occasionally	Can't remember	Can't remember	Can't remember	Occasionally	Can't remember	Can't remember	Can't remember	No	No	No	No	No	No	No	No	No	No	Postdoc	Sought support from colleagues/friends/family		Other	185
1	Group Leader	Male	White	36-45	Moderately	Seldom	Seldom	Seldom	Moderately	Moderately	Can't remember	Moderately	Can't remember	Very often	Very often	Can't remember	Very often	Very often	Very often	No	No	Yes	No	No	Yes	Yes	No	No	Yes	Graduate Student	Used code of silence (did not report)	Fear of retaliation		185
1	Department Chair
1	Principal Investigator	Male	White	56-65	Moderately	Seldom	Occasionally	Occasionally	Very often	Can't remember	Very often	Seldom	Seldom	Very often	Occasionally	Occasionally	Occasionally	Moderately	Moderately	No	No	No	Yes	Yes	No	Yes	No	No	No	Other	Used code of silence (did not report)	Fear of retaliation	Other	187	36
1	Principal Investigator	Male	White	46-55	Can't remember	Seldom	Can't remember	Occasionally	Occasionally	Moderately	Occasionally	Moderately	Seldom	Seldom	Moderately	Can't remember	Can't remember	Very often	Very often	Yes	No	Yes	No	No	No	No	No	No	No	Graduate Student	Reported to my institution/body responsible for your institution	Other	Unfair and biased	185
1	Department Chair	Male	White	46-55	Seldom	Can't remember	Can't remember	Occasionally	Occasionally	Very often	Occasionally		Very often	Can't remember	Can't remember	Can't remember	Can't remember	Can't remember	Very often	Yes	No	No	No	Yes	No	No	No	No	No	Graduate Student	Sought support from colleagues/friends/family	Fear of retaliation		82
1	Principal Investigator	Male	East Indian	36-45	Very often	Occasionally	Occasionally	Moderately	Very often	Very often	Moderately	Can't remember	Can't remember	Can't remember	Can't remember	Can't remember	Can't remember	Moderately	Can't remember	No	No	Yes	Yes	No	No	No	No	No	Yes	Graduate Student	Sought support from colleagues/friends/family	Fear of retaliation		187	15
1	Principal Investigator	Male	White	36-45	Seldom	Seldom	Seldom	Moderately	Occasionally	Can't remember	Occasionally	Moderately	Very often	Occasionally	Occasionally	Occasionally	Occasionally	Occasionally	Moderately	Yes	No	Yes	No	No	Yes	No	No	Yes	No	Graduate Student	Sought support from colleagues/friends/family	Fear of being fired	Unfair and biased
1	Group Leader	Female	White	36-45	Moderately	Occasionally	Very often	Seldom	Seldom	Very often	Moderately	Very often	Very often	Very often	Moderately	Very often	Very often	Very often	Very often	Yes	No	Yes	Yes	Yes	Yes	Yes	Yes	Yes	No	Graduate Student	Sought support from colleagues/friends/family	Fear of retaliation		138
1	Principal Investigator	Male	White	46-55	Moderately	Moderately	Very often	Moderately	Very often	Very often	Moderately	Seldom	Very often	Moderately	Very often	Can't remember	Seldom	Can't remember	Can't remember	Yes	No	No	Yes	Yes	No	No	No	No	Yes	Postdoc	Sought support from colleagues/friends/family	Fear of retaliation		122
1	Principal Investigator	Male	White	36-45	Occasionally	Occasionally	Seldom	Occasionally	Moderately	Can't remember	Moderately	Very often	Very often	Can't remember	Moderately	Can't remember	Moderately	Moderately	Moderately	Yes	No	Yes	No	No	No	No	No	No	Yes	Graduate Student	Sought support from colleagues/friends/family	Fear of retaliation		187
1	Principal Investigator	Female	White	56-65	Very often	Occasionally	Very often	Very often	Very often	Seldom	Moderately	Can't remember	Seldom	Can't remember	Very often	Very often	Very often	Very often	Very often	Yes	No	No	No	Yes	No	No	No	Yes	Yes	Visiting Scientist/Researcher	Used code of silence (did not report)	Fear of retaliation	Unfair and biased	169	53
1	Principal Investigator	Male	White	46-55	Occasionally	Very often	Moderately	Very often	Very often	Very often	Very often	Very often	Occasionally	Seldom	Very often	Seldom	Very often	Moderately	Occasionally	Yes	No	No	Yes	Yes	Yes	Yes	No	Yes	Yes	Postdoc	Used code of silence (did not report)	Fear of retaliation		187	51
1	Principal Investigator	Male	White	56-65	Very often	Very often	Very often	Very often	Very often	Very often	Very often	Very often	Can't remember	Can't remember	Can't remember	Very often	Very often	Very often	Very often	No	No	No	Yes	Yes	No	No	No	No	No	Graduate Student	Reported to my institution/body responsible for your institution		Unfair and biased	187	14
1	Group Leader	Female	White	56-65	Seldom	Can't remember	Moderately	Occasionally	Very often	Occasionally	Occasionally	Can't remember	Occasionally	Moderately	Can't remember	Very often	Seldom	Very often	Very often	No	No	Yes	No	Yes	No	Yes	No	No	Yes	Postdoc	Sought support from colleagues/friends/family	Fear of retaliation	Other
1	Group Leader
1	Group Leader	Male	White	36-45	Moderately	Occasionally	Seldom	Seldom	Seldom	Moderately	Can't remember	Very often	Moderately	Can't remember	Moderately	Can't remember	Very often	Very often	Very often	Yes	No	No	Yes	Yes	No	No	Yes	Yes	No	Other	Reported to my institution/body responsible for your institution		Unfair and biased	185
1	Principal Investigator	Female	White	36-45	Occasionally	Occasionally	Occasionally	Seldom	Occasionally	Occasionally	Moderately	Moderately	Moderately	Moderately	Moderately	Occasionally	Occasionally	Moderately	Occasionally	Yes	No	Yes	No	No	No	Yes	Yes	Yes	Yes	Postdoc	Used code of silence (did not report)	Fear of retaliation	Unfair and biased
1	Group Leader	Male	White	46-55	Seldom	Seldom	Occasionally	Seldom	Seldom	Seldom	Seldom	Occasionally	Seldom	Seldom	Seldom	Seldom	Seldom	Seldom	Seldom	Yes	No	No	No	Yes	Yes	Yes	Yes	Yes	Yes	Other	Reported to my institution/body responsible for your institution	Fear of retaliation	Unfair and biased	84
1	Principal Investigator	Female	White	46-55	Moderately	Moderately	Moderately	Occasionally	Very often	Very often	Very often	Very often	Very often	Very often	Very often	Very often	Very often	Very often	Very often	Yes	No	Yes	Yes	Yes	Yes	Yes	Yes	Yes	Yes	Visiting Scientist/Researcher	Reported to my institution/body responsible for your institution		Unfair and biased	187	23
1	Group Leader	Male	White	46-55	Seldom	Seldom	Occasionally	Seldom	Seldom	Seldom	Seldom	Seldom	Seldom	Seldom	Seldom	Seldom	Seldom	Seldom	Seldom	Yes	No	No	No	Yes	Yes	Yes	No	Yes	Yes	Other	Reported to my institution/body responsible for your institution		Unfair and biased	84
1	Principal Investigator	Female	White	Over 66	Very often	Moderately	Very often	Occasionally	Very often	Very often	Very often	Can't remember	Can't remember	Can't remember	Occasionally	Can't remember	Occasionally	Very often	Occasionally	Yes	Yes	No	Yes	No	No	No	No	No	Yes	Postdoc	Sought support from colleagues/friends/family	Visa issues	Unfair and biased	187	22
1	Principal Investigator
1	Principal Investigator	Male	White	46-55	Very often	Moderately	Moderately	Moderately	Occasionally	Can't remember	Seldom	Occasionally	Occasionally	Can't remember	Seldom	Can't remember	Can't remember	Can't remember	Very often	No	No	Yes	No	Yes	No	Yes	No	No	Yes	Graduate Student	Used code of silence (did not report)	Fear of retaliation	Other
1	Department Chair	Male	White	36-45	Very often						Very often							Moderately	Moderately					Yes	Yes	Yes		Yes		Other	Reported to my institution/body responsible for your institution		Unfair and biased	123
1	Principal Investigator	Male	White	56-65	Can't remember	Occasionally	Seldom	Seldom	Occasionally	Can't remember	Can't remember	Occasionally	Can't remember	Seldom	Occasionally	Can't remember	Occasionally	Occasionally	Occasionally	No	No	Yes	No	No	No	Yes	No	No	No	Graduate Student	Used code of silence (did not report)	Fear of retaliation		65
1	Principal Investigator	Female	Black or African American	36-45	Very often	Moderately	Moderately	Very often	Very often	Very often	Very often	Very often		Very often	Occasionally	Seldom	Very often	Very often	Very often	Yes	No	Yes	Yes	No	Yes	Yes	No	Yes	Yes	Graduate Student	Sought support from colleagues/friends/family	Fear of retaliation		187	10
1	Principal Investigator	Male	White	56-65	Moderately	Moderately	Moderately	Occasionally	Moderately	Moderately	Moderately	Moderately	Can't remember	Moderately	Seldom	Seldom	Moderately	Seldom	Seldom	No	No	No	No	Yes	No	No	No	No	Yes	Graduate Student	Reported to my institution/body responsible for your institution	Fear of retaliation	Unfair and biased	187	34
1	Group Leader	Male	White	46-55	Very often	Seldom	Seldom	Seldom	Moderately	Very often	Very often	Very often	Very often	Moderately	Very often	Very often	Very often	Very often	Very often	No	No	No	Yes	Yes	Yes	Yes	No	Yes	Yes	Postdoc	Used code of silence (did not report)	Fear of retaliation		65
1	Principal Investigator	Female	White	46-55	Moderately	Moderately	Moderately	Moderately	Very often	Very often	Very often	Very often	Moderately	Very often	Very often	Very often	Very often	Very often	Very often	Yes	No		Yes	Yes		Yes	Yes		Yes	Postdoc	Reported to my institution/body responsible for your institution		Unfair and biased	187	23
1	Principal Investigator	Male	White	56-65	Very often	Very often	Very often	Very often	Very often	Moderately	Very often	Very often	Very often	Can't remember	Very often	Can't remember	Very often	Very often	Can't remember	Yes	Yes	No	Yes	Yes	Yes	Yes	No	Yes	Yes	Postdoc	Used code of silence (did not report)	Fear of being fired	Unfair and biased
1	Principal Investigator	Male	White	56-65	Occasionally	Can't remember	Can't remember	Occasionally	Can't remember	Very often	Can't remember	Occasionally	Very often	Occasionally	Very often	Occasionally	Occasionally	Moderately	Can't remember	Yes	No	No	No	Yes	No	No	No	No	No	Graduate Student	Sought support from colleagues/friends/family	Fear of retaliation	Unfair and biased	65
1	Principal Investigator	Male	White	46-55	Moderately	Seldom	Moderately	Occasionally	Moderately	Very often	Very often	Moderately	Very often	Very often	Very often	Moderately	Very often	Very often	Very often	Yes	No	No	Yes	Yes	No	Yes	No	No	Yes	Postdoc	Sought support from colleagues/friends/family	Fear of retaliation	Unfair and biased	187	23
1	Principal Investigator	Female	White	46-55	Occasionally	Very often	Moderately	Very often	Very often	Moderately	Seldom	Seldom	Moderately	Very often	Very often	Moderately	Very often	Moderately	Moderately	Yes	No	Yes	Yes	Yes	No	Yes	No	No	Yes	Graduate Student	Sought support from colleagues/friends/family	Fear of retaliation		187	33
1	Lab Supervisor	Male	White	36-45	Occasionally	Moderately	Can't remember	Can't remember	Can't remember	Moderately	Seldom	Seldom	Seldom	Seldom	Can't remember	Can't remember	Can't remember	Can't remember	Can't remember	No	No	No	No	No	No	No	No	No	No	Graduate Student	Reported to my institution/body responsible for your institution		Fair and unbiased	65	21
1	Department Chair	Other genders	Asian	46-55	Seldom	Can't remember	Can't remember	Can't remember	Moderately		Moderately	Can't remember	Very often	Can't remember	Can't remember	Can't remember	Moderately	Can't remember	Very often	Yes	No	No	Yes	No	No	No	No	No	No	Other	Sought support from colleagues/friends/family			136
1	Principal Investigator
1	Principal Investigator	Male	White	36-45	Can't remember	Occasionally	Can't remember	Can't remember	Can't remember	Can't remember	Can't remember	Can't remember	Can't remember	Can't remember	Can't remember	Can't remember	Can't remember	Can't remember	Can't remember	Yes	No	No	No	No	No	No	No	No	No	Graduate Student	Sought support from colleagues/friends/family	Other	Other
1	Principal Investigator
1	Group Leader	Male	Asian	56-65	Very often	Can't remember	Can't remember	Can't remember	Can't remember	Seldom	Seldom	Can't remember	Very often	Occasionally	Very often	Can't remember	Very often	Can't remember	Seldom	No	No	No	No	No	Yes	No	No	No	No	Postdoc	Reported to my institution/body responsible for your institution		Other	86
1	Principal Investigator
1	Principal Investigator
1	Principal Investigator	Male	Hispanic	46-55	Occasionally	Occasionally	Seldom	Seldom	Seldom	Can't remember	Occasionally	Can't remember	Can't remember	Can't remember	Occasionally	Moderately	Occasionally	Occasionally	Occasionally	Yes	No	Yes	No	No	No	Yes	No	Yes	No	Postdoc	Sought support from colleagues/friends/family	Fear of retaliation		185
1	Principal Investigator
1	Department Chair	Female	White	25-35	Occasionally	Occasionally	Seldom	Occasionally	Moderately	Very often	Moderately	Very often	Very often	Very often	Very often	Moderately	Very often	Very often	Very often	No	No	No	No	Yes	No	No	No	No	No	Graduate Student	Reported to my institution/body responsible for your institution	Fear of being fired	Other	185
1	Principal Investigator	Male	White	46-55	Seldom	Occasionally	Seldom	Can't remember	Moderately	Can't remember	Very often	Can't remember	Can't remember	Can't remember	Can't remember	Seldom	Seldom	Can't remember	Occasionally	No	No	No	No	No	No	No	No	No	No	Postdoc	Other	Other	Other
1	Lab Supervisor	Female	White	56-65	Very often	Very often	Moderately		Very often	Very often	Very often	Occasionally	Occasionally	Very often	Moderately	Very often	Very often	Occasionally	Occasionally	No	No	No	No	Yes	Yes	No	No	No	No	Visiting Scientist/Researcher	Used code of silence (did not report)	Fear of retaliation
1	Principal Investigator	Male	White	36-45					Very often	Very often	Moderately				Very often		Very often	Very often	Very often	No	No	No	No	No	Yes	Yes	Yes	Yes	Yes	Postdoc	Used code of silence (did not report)	Fear of retaliation	Unfair and biased
1	Principal Investigator	Male	Black or African American	56-65	Occasionally	Seldom	Seldom	Seldom	Moderately	Very often	Very often	Moderately	Very often	Occasionally	Very often	Seldom	Very often	Very often	Very often	Yes	No	No	Yes	No	Yes	Yes	No	No	Yes	Postdoc	Used code of silence (did not report)	Fear of retaliation		182
1	Principal Investigator	Male	White	46-55	Occasionally	Moderately	Occasionally	Can't remember	Very often	Moderately	Very often	Very often	Very often	Can't remember	Occasionally	Can't remember	Seldom	Very often	Very often	No	No	Yes	Yes	Yes	No	Yes	Yes	No	Yes	Postdoc	Used code of silence (did not report)	Visa issues	Other	187	15
1	Principal Investigator
1	Principal Investigator	Male	White	46-55	Can't remember	Can't remember	Can't remember	Can't remember	Seldom	Can't remember	Can't remember	Can't remember	Can't remember	Can't remember	Occasionally	Occasionally	Moderately	Very often	Moderately	No	No	Yes	No	No	No	No	No	No	Yes	Postdoc	Sought support from colleagues/friends/family	Fear of being fired	Unfair and biased	187	10
1	Principal Investigator
1	Department Chair	Male	White	46-55	Can't remember	Can't remember	Can't remember	Can't remember	Can't remember	Occasionally	Can't remember	Can't remember	Can't remember	Occasionally	Very often	Can't remember	Very often	Very often	Very often	Yes	No	No	No	No	Yes	Yes	No	Yes	No	Other	Sought support from colleagues/friends/family	Fear of retaliation		84
1	Principal Investigator
1	Department Chair
1	Principal Investigator	Male	White	46-55	Seldom	Seldom	Very often	Very often	Moderately	Very often	Occasionally	Moderately	Moderately	Very often	Very often	Occasionally	Very often	Occasionally	Very often	Yes	No	No	Yes	Yes	Yes	Yes	No	Yes	Yes	Graduate Student	Reported to my institution/body responsible for your institution	Other	Unfair and biased	187	22
1	Principal Investigator	Female	White	36-45	Moderately	Occasionally	Seldom	Seldom	Moderately	Seldom	Seldom	Very often	Can't remember	Can't remember	Occasionally	Can't remember	Can't remember	Occasionally	Can't remember	Yes	No	Yes	No	No	Yes	No	Yes	Yes	No	Graduate Student	Reported to my institution/body responsible for your institution	Fear of retaliation	Unfair and biased	187	17
1	Principal Investigator	Male	White	46-55	Occasionally	Seldom	Can't remember	Seldom	Can't remember	Occasionally	Occasionally	Can't remember	Can't remember	Can't remember	Seldom	Can't remember	Can't remember	Can't remember	Can't remember	No	No	Yes	No	No	No	No	No	No	No	Graduate Student	Sought support from colleagues/friends/family			187	22
1	Department Chair
1	Lab Supervisor	Female	White	25-35		Occasionally	Seldom	Moderately	Very often	Moderately	Seldom	Very often	Moderately	Very often	Occasionally	Seldom	Seldom	Seldom	Seldom		No	No	No	No	No	No	Yes	No	No	Graduate Student	Sought support from colleagues/friends/family	Other	Unfair and biased	169
1	Principal Investigator	Male	White	36-45	Seldom	Very often	Occasionally		Occasionally		Seldom		Can't remember		Can't remember	Occasionally	Occasionally		Moderately	No	No	Yes	No	No	No	No	No	No	No	Graduate Student	Used code of silence (did not report)	Fear of being fired
1	Principal Investigator	Male	White	36-45	Very often	Very often	Very often		Very often	Very often	Very often	Very often	Very often	Very often	Very often	Occasionally	Very often	Very often	Very often	No	No	No	No	No	No	No	No	No	No	Visiting Scientist/Researcher	Sought support from colleagues/friends/family	Fear of retaliation	Unfair and biased	123
1	Principal Investigator	Male	White	46-55	Moderately	Moderately	Occasionally	Can't remember	Seldom	Can't remember	Occasionally	Moderately	Can't remember	Can't remember	Moderately	Seldom	Moderately	Very often	Occasionally	No	No	Yes	Yes	No	No	Yes	No	No	Yes	Graduate Student	Sought support from colleagues/friends/family	Fear of retaliation		187	34
1	Principal Investigator
1	Group Leader	Male	White	56-65	Occasionally	Occasionally	Occasionally	Occasionally	Occasionally	Occasionally	Can't remember	Moderately	Can't remember	Can't remember	Seldom	Very often	Moderately	Very often	Very often
1	Group Leader	Male	White	56-65	Moderately	Occasionally	Occasionally	Occasionally	Can't remember		Occasionally	Occasionally	Moderately	Seldom	Occasionally	Occasionally	Occasionally		Can't remember	Yes	No	No	No	Yes	No	No	No	No	No	Other	Used code of silence (did not report)	Fear of retaliation	Other	187	45
1	Principal Investigator	Male	White	56-65	Moderately	Moderately	Occasionally	Moderately	Very often	Can't remember	Occasionally	Moderately	Can't remember	Very often	Very often	Very often	Very often	Very often	Very often	No	Yes	Yes	Yes	Yes	No	No	No	No	Yes	Postdoc	Other	Other	Unfair and biased	24
1	Principal Investigator	Female	White	36-45	Very often	Very often	Occasionally	Very often	Very often	Very often	Moderately	Very often	Very often	Seldom	Very often	Very often	Very often	Very often	Very often	Yes	No	Yes	No	Yes	Yes	Yes	No	No	No	Graduate Student	Sought support from colleagues/friends/family	Fear of retaliation		61
1	Principal Investigator	Male	White	56-65	Moderately	Can't remember	Moderately	Moderately	Very often	Can't remember	Can't remember		Very often	Can't remember	Very often	Can't remember	Very often	Can't remember	Can't remember	Yes	No	No	No	Yes	Yes	Yes	No	Yes	No	Postdoc	Sought support from colleagues/friends/family	Fear of retaliation	Unfair and biased
1	Department Chair
1	Principal Investigator
1	Principal Investigator	Male	Asian	36-45	Very often	Very often	Very often	Very often	Very often	Moderately	Very often	Very often	Seldom	Seldom	Can't remember	Very often	Very often	Very often	Very often	Yes	No	Yes	Yes	Yes	No	No	Yes	Yes	Yes	Graduate Student	Used code of silence (did not report)	Fear of retaliation	Unfair and biased
1
1	Principal Investigator
1	Principal Investigator	Female	White0	46-55	Can't remember		Occasionally		Occasionally		Occasionally		Can't remember		Occasionally		Very often		Very often	Yes	Yes	No	Yes	Yes	No	Yes	Yes	No	No	Graduate Student	Other	Visa issues
1	Group Leader	Male	White	46-55	Occasionally	Occasionally	Occasionally	Can't remember	Can't remember	Can't remember	Can't remember	Can't remember	Moderately	Very often	Very often	Moderately	Very often	Very often	Very often	No	No	Yes	Yes	No	Yes	Yes	No	Yes	Yes	Postdoc	Reported to my institution/body responsible for your institution	Other	Unfair and biased	187	10
1	Principal Investigator	Male	Hispanic	46-55	Moderately	Occasionally	Can't remember	Very often	Moderately	Can't remember	Can't remember	Can't remember	Can't remember	Moderately	Moderately	Very often	Very often	Very often	Very often	No	No	Yes	No	No	No	Yes	No	No	No	Postdoc	Used code of silence (did not report)	Fear of being fired
1	Principal Investigator	Male	Hispanic	46-55	Can't remember	Occasionally	Occasionally	Seldom	Moderately	Occasionally	Occasionally	Occasionally	Seldom	Can't remember	Can't remember	Occasionally	Seldom	Moderately	Can't remember	No	No	Yes	No	No	No	No	No	No	No	Graduate Student	Sought support from colleagues/friends/family	Fear of retaliation	Other	187	14
1
1	Principal Investigator
1	Principal Investigator	Male	White	25-35	Moderately	Can't remember	Occasionally	Can't remember	Occasionally	Can't remember	Can't remember	Can't remember	Can't remember	Can't remember	Seldom	Can't remember	Seldom	Can't remember	Seldom	No	No	No	No	No	No	Yes	No	No	No	Postdoc	Other	Other		60
1	Group Leader	Male	White	36-45	Moderately	Moderately	Moderately	Moderately	Very often	Occasionally	Seldom	Moderately	Moderately	Can't remember	Occasionally	Occasionally	Moderately	Moderately	Seldom	No	No	No	No	No	No	No	No	No	Yes	Graduate Student	Reported to my institution/body responsible for your institution		Fair and unbiased	169
1	Principal Investigator
1	Principal Investigator	Female	White	46-55	Occasionally	Occasionally	Can't remember	Can't remember	Can't remember	Moderately	Seldom	Moderately	Moderately	Can't remember	Seldom	Moderately	Can't remember	Occasionally	Occasionally	Yes	No	Yes	No	No	No	No	No	No	No	Graduate Student	Reported to my institution/body responsible for your institution		Other	187	49
1	Principal Investigator
1	Principal Investigator	Male	Mixed Race	56-65	Can't remember	Occasionally	Seldom	Can't remember	Moderately	Can't remember	Seldom	Can't remember	Can't remember	Can't remember	Can't remember	Can't remember	Occasionally	Can't remember	Can't remember	No	No	No	Yes	No	No	No	No	No	No	Graduate Student	Sought support from colleagues/friends/family	Fear of being fired
1	Lab Supervisor
1	Principal Investigator	Male	White	56-65	Seldom	Can't remember	Seldom	Can't remember	Very often	Occasionally	Seldom	Occasionally	Moderately	Can't remember	Can't remember	Can't remember	Moderately	Seldom	Occasionally	No	No	Yes	No	No	No	No	No	No	Yes	Graduate Student	Sought support from colleagues/friends/family	Other	Fair and unbiased	187	33
1	Department Chair
1
1	Principal Investigator
1	Principal Investigator
1	Principal Investigator
1	Department Chair
1	Principal Investigator	Male	White	46-55	Seldom	Seldom	Can't remember	Can't remember	Seldom	Moderately	Occasionally	Seldom	Can't remember	Occasionally	Seldom	Can't remember	Seldom	Can't remember	Seldom	No	No	No	No	No	No	Yes	No	No	No	Postdoc	Reported to my institution/body responsible for your institution		Fair and unbiased	123
1	Principal Investigator
1	Principal Investigator	Female	White	36-45	Can't remember	Moderately	Can't remember	Moderately	Very often	Seldom	Seldom	Moderately	Very often	Occasionally	Very often	Can't remember	Very often	Very often	Very often	No	No	No	Yes	Yes	No	No	No	Yes	Yes	Postdoc	Sought support from colleagues/friends/family	Fear of retaliation	Unfair and biased	168
1	Lab Supervisor
1	Lab Supervisor
1	Department Chair	Male	White	36-45	Seldom	Can't remember	Can't remember	Can't remember	Can't remember	Occasionally	Occasionally	Can't remember	Can't remember	Can't remember	Can't remember	Seldom	Can't remember	Can't remember	Can't remember	No	No	No	No	No	No	No	No	No	No	Graduate Student	Other		Unfair and biased
1	Lab Supervisor
1	Principal Investigator	Female	White	36-45	Occasionally	Seldom	Occasionally	Seldom	Occasionally	Very often	Very often	Very often	Moderately	Moderately	Very often	Can't remember	Very often	Very often	Very often	Yes	Yes	No	No	Yes	Yes	Yes	No	Yes	Yes	Postdoc	Reported to my institution/body responsible for your institution		Unfair and biased
1	Principal Investigator	Female	White	36-45	Can't remember	Seldom	Can't remember	Can't remember	Moderately	Can't remember	Can't remember	Can't remember	Occasionally	Can't remember	Can't remember	Can't remember	Can't remember	Moderately	Seldom	No	No	No	No	No	No	No	Yes	No	Yes	Graduate Student	Reported to my institution/body responsible for your institution		Fair and unbiased	65
1	Principal Investigator	Female	White	36-45											Very often		Very often	Very often	Very often						Yes	Yes		Yes		Postdoc	Used code of silence (did not report)	Fear of being fired
1
1	Department Chair	Male	East Indian	56-65	Moderately	Seldom	Moderately	Occasionally	Moderately	Can't remember	Can't remember	Can't remember	Can't remember	Can't remember	Can't remember	Can't remember	Can't remember	Very often	Occasionally	No	No	No	No	No	No	No	No	No	No	Other	Used code of silence (did not report)	Fear of retaliation	Other	187	39
1	Principal Investigator	Male	White	36-45	Can't remember	Can't remember	Occasionally	Can't remember	Seldom	Can't remember	Can't remember	Occasionally	Can't remember	Occasionally	Can't remember	Can't remember	Can't remember	Can't remember	Occasionally	No	No	No	No	No	No	No	No	No	Yes	Postdoc	Reported to my institution/body responsible for your institution		Fair and unbiased	185
1	Lab Supervisor
1
1	Principal Investigator	Female	White	56-65	Moderately	Seldom	Moderately	Occasionally	Moderately	Seldom	Seldom	Seldom	Seldom	Seldom	Occasionally	Seldom	Occasionally	Seldom	Seldom	No	No	No	No	No	No	No	No	No	No	Postdoc	Used code of silence (did not report)	Fear of being fired		187	22
1	Department Chair
1	Principal Investigator
1	Principal Investigator	Male	White	46-55	Occasionally	Occasionally	Occasionally	Occasionally	Occasionally	Occasionally	Occasionally	Occasionally	Occasionally	Occasionally	Occasionally	Occasionally	Occasionally	Occasionally	Occasionally	No	No	No	No	No	No	Yes	No	No	No	Postdoc	Sought support from colleagues/friends/family	Fear of retaliation		187	33
1	Department Chair
1	Principal Investigator	Male	White	36-45	Seldom	Occasionally	Moderately	Seldom	Moderately	Occasionally	Seldom	Occasionally	Moderately	Can't remember	Moderately	Occasionally	Occasionally	Seldom	Seldom	No	No	Yes	No	No	Yes	No	No	No	No	Graduate Student	Sought support from colleagues/friends/family	Fear of retaliation		138
1	Principal Investigator
1	Principal Investigator	Female	White	36-45	Can't remember	Moderately	Can't remember	Occasionally	Can't remember	Moderately	Moderately	Moderately	Occasionally	Can't remember	Very often	Can't remember	Very often	Moderately	Very often	No	No	No	Yes	Yes	No	Yes	No	Yes	No	Postdoc	Sought support from colleagues/friends/family	Other	Unfair and biased
1	Principal Investigator	Male	Mixed Race	56-65	Very often	Seldom	Can't remember	Occasionally	Moderately	Very often	Moderately	Can't remember	Very often	Very often	Very often	Can't remember	Very often	Can't remember	Can't remember	Yes	No	No	No	No	Yes	No	No	No	Yes	Other	Used code of silence (did not report)	Fear of retaliation	Unfair and biased	24
1	Department Chair
1	Department Chair
1	Department Chair
1	Principal Investigator
1	Department Chair
1	Department Chair	Female	White	36-45	Moderately	Moderately	Occasionally	Occasionally	Moderately	Very often	Very often	Very often	Very often	Moderately	Moderately	Moderately	Moderately	Very often	Very often	No	No	Yes	Yes	Yes	No	No	No	No	Yes	Other	Reported to my institution/body responsible for your institution	Fear of being fired	Unfair and biased	36	53
1	Department Chair	Male	White	56-65	Moderately	Seldom	Occasionally	Moderately	Moderately	Very often	Occasionally	Very often	Moderately	Very often	Very often	Very often	Moderately	Very often	Very often	Yes	No	Yes	Yes	Yes	Yes	No	Yes	Yes	Yes	Other	Reported to my institution/body responsible for your institution		Other	67
1	Principal Investigator
1	Department Chair
1	Principal Investigator
1	Department Chair
1	Department Chair
1	Principal Investigator
1	Principal Investigator	Male	White	56-65	Very often	Very often	Occasionally	Occasionally	Occasionally	Very often	Very often	Very often	Very often	Very often	Very often	Very often	Very often	Very often	Very often	Yes	No	Yes	Yes	Yes	No	No	Yes	Yes	Yes	Visiting Scientist/Researcher	Used code of silence (did not report)	Fear of being fired	Unfair and biased
1	Principal Investigator	Male	White	46-55	Very often	Moderately	Occasionally		Very often	Very often	Very often	Very often	Moderately		Very often		Very often	Very often	Very often	Yes			Yes	Yes	Yes	Yes		No	Yes	Graduate Student	Reported to my institution/body responsible for your institution		Other
1	Principal Investigator
1	Group Leader
1	Principal Investigator	Male	White	46-55	Moderately	Occasionally	Very often	Seldom	Moderately	Can't remember	Occasionally	Can't remember	Can't remember	Can't remember	Occasionally	Very often	Very often	Very often	Very often	No	No	Yes	No	Yes	Yes	Yes	No	No	No	Graduate Student	Sought support from colleagues/friends/family	Other
1	Group Leader	Male	Black or African American	46-55	Occasionally	Occasionally	Moderately	Seldom	Moderately	Very often	Moderately	Occasionally	Moderately	Can't remember	Occasionally	Moderately	Seldom	Very often	Very often	No	No	No	No	Yes	No	No	No	No	No	Other	Sought support from colleagues/friends/family	Fear of retaliation
1	Lab Supervisor	Female	East Indian	56-65	Very often	Very often	Very often	Very often	Occasionally	Very often	Very often	Very often	Occasionally	Can't remember	Moderately	Very often	Very often	Can't remember	Very often	No	No	No	No	Yes	No	No	No	No	Yes	Other	Reported to my institution/body responsible for your institution		Unfair and biased
1	Group Leader
1	Department Chair
1	Lab Supervisor	Female	White	56-65	Occasionally	Occasionally	Moderately	Moderately	Very often	Very often	Very often	Occasionally	Moderately	Can't remember	Can't remember	Can't remember	Can't remember	Can't remember	Can't remember	No	No	No	No	Yes	No	No	No	No	No	Graduate Student	Other	Fear of retaliation		65
1	Department Chair
1	Department Chair
1	Principal Investigator	Male	White	56-65	Seldom	Moderately	Occasionally	Can't remember	Can't remember	Occasionally	Occasionally	Can't remember	Occasionally	Can't remember	Can't remember	Seldom	Can't remember	Seldom	Seldom	No	No	No	No	No	No	No	No	No	No	Graduate Student	Sought support from colleagues/friends/family	Other
1	Principal Investigator
1	Principal Investigator
1	Group Leader
1	Principal Investigator
1	Group Leader	Male	White	36-45	Very often	Moderately	Can't remember	Moderately	Occasionally	Moderately	Very often	Moderately	Occasionally	Occasionally	Moderately	Can't remember	Moderately	Can't remember	Can't remember	Yes	No	No	No	Yes	No	No	No	No	Yes	Other	Sought support from colleagues/friends/family	Fear of retaliation
1	Department Chair
1	Principal Investigator
1	Principal Investigator
1	Department Chair
1	Principal Investigator
1	Department Chair	Female	White	46-55	Moderately	Moderately	Moderately	Seldom	Seldom	Seldom	Seldom	Seldom	Very often	Occasionally	Seldom	Moderately	Seldom	Occasionally	Moderately	No	No	No	No	No	No	No	No	No	No	Visiting Scientist/Researcher	Used code of silence (did not report)	Other	Unfair and biased
1	Department Chair	Male	Asian	56-65	Occasionally	Very often	Moderately	Occasionally	Occasionally	Moderately	Occasionally	Occasionally	Seldom	Occasionally	Seldom	Can't remember	Occasionally	Seldom	Can't remember	No	No	No	Yes	Yes	No	Yes	No	No	Yes	Other	Sought support from colleagues/friends/family	Fear of retaliation	Other
1	Department Chair
1	Principal Investigator
1	Department Chair
1	Principal Investigator
1	Group Leader	Female	White	56-65	Occasionally	Very often	Can't remember	Can't remember	Seldom	Very often	Moderately	Occasionally	Moderately	Can't remember	Seldom	Occasionally	Occasionally	Occasionally	Occasionally	Yes	No	No	Yes	No	No	Yes	No	Yes	Yes	Other	Sought support from colleagues/friends/family	Other
1	Principal Investigator
1	Principal Investigator
1	Principal Investigator
1	Principal Investigator
1	Principal Investigator
1	Principal Investigator
1	Department Chair	Male	White	36-45	Moderately	Seldom	Moderately	Moderately	Moderately	Moderately	Occasionally	Moderately	Moderately	Moderately	Occasionally	Seldom	Moderately	Moderately	Moderately	No	No	No	No	Yes	No	No		No	Yes	Visiting Scientist/Researcher	Other	Other	Fair and unbiased
1	Principal Investigator
1	Department Chair
1	Group Leader	Male	White	46-55	Very often	Occasionally	Very often	Occasionally	Moderately	Very often	Very often	Seldom	Very often	Can't remember	Seldom	Seldom	Moderately	Occasionally	Can't remember	No	No	No	No	No	No	No	No	No	No	Other	Other	Fear of retaliation		187	6
1	Lab Supervisor
1	Lab Supervisor	Female	White	36-45	Occasionally	Seldom	Occasionally	Can't remember	Moderately	Seldom	Seldom	Seldom	Can't remember	Occasionally	Occasionally	Occasionally	Occasionally	Seldom	Occasionally	Yes	No	No	No	No	Yes	Yes	No	No	No	Graduate Student	Used code of silence (did not report)	Fear of retaliation		9
1	Department Chair
1	Department Chair
1	Principal Investigator
1	Principal Investigator	Female	Asian	36-45	Occasionally	Very often	Seldom	Seldom	Moderately	Moderately	Occasionally	Occasionally	Moderately	Occasionally	Can't remember	Occasionally	Seldom	Seldom	Seldom	No	No	Yes	No	No	No	No	No	No	Yes	Graduate Student	Used code of silence (did not report)	Fear of retaliation
1	Department Chair
1	Principal Investigator	Male	White	56-65	Seldom	Moderately	Moderately	Occasionally	Moderately	Moderately	Moderately	Very often	Moderately	Very often	Moderately	Occasionally	Moderately	Moderately	Moderately	Yes	No	Yes	Yes	No	No	No	No	No	Yes	Postdoc	Sought support from colleagues/friends/family	Fear of retaliation
1	Principal Investigator
1	Group Leader	Male	White	36-45	Can't remember	Can't remember	Can't remember	Can't remember	Can't remember	Can't remember	Can't remember	Can't remember	Very often	Very often	Can't remember	Can't remember	Can't remember	Can't remember	Can't remember	No	No	No	No	No	No	Yes	No	No	No	Postdoc	Used code of silence (did not report)	Fear of retaliation		187	5
1	Principal Investigator	Female	East Indian	Over 66	Can't remember	Occasionally	Seldom	Occasionally	Very often	Moderately	Can't remember	Seldom	Moderately	Moderately	Very often	Occasionally	Very often	Moderately	Occasionally	No	No	No	Yes	Yes	Yes	No		Yes	Yes	Postdoc	Sought support from colleagues/friends/family	Fear of retaliation
1	Lab Supervisor
1	Group Leader
1	Group Leader
1	Department Chair
1	Department Chair
1	Principal Investigator
1	Department Chair	Female	White	56-65	Seldom	Very often	Seldom	Occasionally	Moderately	Very often	Very often	Very often	Very often	Seldom	Moderately	Can't remember	Moderately	Very often	Very often	No	No	Yes	Yes	No	Yes	Yes	Yes	Yes	No	Visiting Scientist/Researcher	Reported to my institution/body responsible for your institution	Fear of retaliation	Other
1	Principal Investigator
1	Principal Investigator	Female	White	36-45	Occasionally	Occasionally		Very often		Moderately		Occasionally		Can't remember		Occasionally		Occasionally	Can't remember	Yes	No	Yes	No	Yes	Yes	No	No	No	Yes	Undergraduate Student	Used code of silence (did not report)	Fear of retaliation
1	Principal Investigator	Male	White	46-55	Occasionally	Seldom	Occasionally	Very often	Can't remember	Very often	Very often	Can't remember	Very often	Can't remember	Very often	Can't remember	Occasionally	Can't remember	Can't remember	Yes	No	Yes	No	No	Yes	Yes	No	Yes	Yes	Postdoc	Sought support from colleagues/friends/family	Fear of being fired
1	Group Leader	Female	White	36-45	Very often	Can't remember	Very often	Seldom	Very often	Very often	Moderately	Very often	Very often	Very often	Seldom	Can't remember	Moderately	Can't remember	Moderately	No	No	No	No	Yes	No	No	No	No	No	Other	Sought support from colleagues/friends/family	Fear of retaliation
1	Principal Investigator
1	Principal Investigator
1	Group Leader	Male	White	Over 66	Very often	Very often				Very often	Very often	Very often	Very often	Very often	Very often	Very often	Very often	Very often	Very often	Yes			Yes	Yes	Yes			Yes	Yes	Other	Used code of silence (did not report)	Fear of being fired	Unfair and biased
1	Lab Supervisor
1	Principal Investigator
1	Principal Investigator	Female	White	46-55	Occasionally	Seldom	Very often	Moderately	Very often	Occasionally	Moderately	Seldom	Occasionally	Very often	Occasionally	Moderately	Moderately	Very often	Very often	No	No	Yes	No	No	No	No	No	No	No	Graduate Student	Other	Fear of retaliation	Unfair and biased
1	Department Chair	Prefer not to specify	White	46-55	Seldom	Moderately	Very often	Very often	Moderately	Very often	Very often	Moderately	Very often	Occasionally	Very often	Seldom	Moderately	Very often	Occasionally	Yes	No	No	Yes	Yes	Yes	No	Yes	No	Yes	Graduate Student	Reported to my institution/body responsible for your institution		Unfair and biased	61
1	Principal Investigator	Male	White	36-45	Occasionally	Moderately	Can't remember	Can't remember	Can't remember	Seldom	Seldom	Occasionally	Very often	Can't remember	Very often	Can't remember	Very often	Very often	Very often	No	No	No	Yes	No	Yes	Yes	No	Yes	No	Postdoc	Sought support from colleagues/friends/family	Fear of retaliation	Other	187	33
1	Department Chair
1	Principal Investigator
1	Principal Investigator	Male	Asian	56-65	Moderately	Moderately	Seldom	Seldom	Seldom	Moderately	Very often	Moderately	Occasionally	Moderately	Very often	Moderately	Very often	Very often	Very often	Yes	No	Yes	No	Yes	No	Yes	Yes	Yes	No	Postdoc	Reported to my institution/body responsible for your institution	Fear of being fired	Fair and unbiased	187	5
1	Principal Investigator	Female	White	Over 66	Can't remember	Moderately	Can't remember	Can't remember	Can't remember	Moderately	Occasionally	Can't remember	Moderately	Seldom	Very often	Very often	Very often	Very often	Very often	Yes	No	Yes	No	Yes	Yes	Yes	Yes	Yes	No	Visiting Scientist/Researcher	Sought support from colleagues/friends/family	Fear of retaliation		84
1	Principal Investigator
1	Principal Investigator	Male	Asian	36-45	Occasionally	Very often	Very often	Occasionally	Very often	Very often	Moderately	Occasionally	Moderately	Seldom	Moderately	Seldom	Very often	Very often	Very often	No	No	Yes	Yes	No	Yes	Yes	No	No	Yes	Graduate Student	Reported to my institution/body responsible for your institution		Unfair and biased
1	Group Leader
1	Department Chair	Female	White	36-45	Moderately	Occasionally	Occasionally	Can't remember	Moderately	Moderately	Occasionally	Moderately	Occasionally	Can't remember	Moderately	Moderately	Moderately	Can't remember	Moderately	Yes	No	No	No	Yes	No	No	No	No	No	Graduate Student	Used code of silence (did not report)	Fear of retaliation
1	Group Leader
1	Principal Investigator	Female	White	25-35	Moderately	Very often	Moderately	Moderately	Moderately	Moderately	Moderately	Moderately	Moderately	Moderately	Moderately	Moderately	Moderately	Moderately	Moderately	Yes	No	No	No	Yes	No	Yes	No	No	No	Postdoc	Other	Other
1	Principal Investigator
1	Principal Investigator	Female	Hispanic	36-45	Occasionally	Can't remember	Moderately	Occasionally	Very often	Occasionally	Moderately	Very often	Occasionally	Very often	Occasionally	Occasionally	Occasionally	Moderately	Can't remember	No	No	No	No	No	No	Yes	No	No	No	Postdoc	Used code of silence (did not report)	Other	Other
1	Group Leader	Male	Middle Eastern	56-65	Moderately	Very often	Occasionally	Moderately	Moderately	Occasionally	Moderately	Occasionally	Very often	Very often	Very often	Very often	Very often	Occasionally	Very often	Yes	No	Yes	Yes	Yes	No	No	No	Yes	Yes	Other	Other	Fear of retaliation	Unfair and biased
1	Department Chair	Other genders	White	46-55	Can't remember	Occasionally	Can't remember	Occasionally	Occasionally	Can't remember	Can't remember	Occasionally	Can't remember	Seldom	Occasionally	Occasionally	Occasionally	Can't remember	Can't remember	Yes	No	No	No	No	No	No	No	No	Yes	Other	Sought support from colleagues/friends/family	Fear of being fired	Unfair and biased
1	Lab Supervisor
1	Principal Investigator
1	Department Chair
1	Lab Supervisor
1	Group Leader
1	Group Leader
1	Principal Investigator
1	Department Chair
1	Principal Investigator	Male	Asian	46-55	Very often	Very often	Very often	Very often	Can't remember	Very often	Very often	Can't remember	Very often	Very often	Very often	Can't remember	Very often	Very often	Very often	Yes				Yes	Yes	Yes		Yes	Yes	Graduate Student	Reported to my institution/body responsible for your institution		Unfair and biased
1	Group Leader
1	Principal Investigator
1	Lab Supervisor
1	Lab Supervisor
1	Principal Investigator
1	Group Leader
1	Department Chair
1	Principal Investigator	Male	White	36-45	Moderately	Very often	Moderately	Can't remember	Can't remember	Very often	Moderately	Can't remember	Occasionally	Can't remember	Can't remember	Very often	Moderately	Very often	Very often	No	No	No	No	No	No	No	No	No	No	Graduate Student	Sought support from colleagues/friends/family	Fear of retaliation	Other
1	Principal Investigator
1	Principal Investigator
1	Principal Investigator	Male	White	46-55	Very often	Seldom	Seldom	Seldom	Very often	Very often	Occasionally	Occasionally	Very often	Seldom	Seldom	Can't remember	Moderately	Moderately	Occasionally	Yes	No	Yes	No	Yes	No	No	No	No	Yes	Other	Sought support from colleagues/friends/family	Fear of retaliation	Unfair and biased
1	Department Chair
1	Principal Investigator	Male	White	56-65	Moderately	Very often	Moderately	Moderately	Seldom	Occasionally	Very often	Very often	Very often	Can't remember	Seldom	Seldom	Very often	Can't remember	Can't remember	No	No	Yes	No	No	Yes	No	No	Yes	Yes	Postdoc	Used code of silence (did not report)	Fear of retaliation	Unfair and biased	187	22
1
1	Department Chair
1	Principal Investigator
1	Principal Investigator
1	Principal Investigator
1	Principal Investigator	Female	White	36-45	Can't remember	Very often	Very often	Very often	Very often	Very often	Very often	Very often	Can't remember	Can't remember	Very often	Moderately	Very often	Moderately	Moderately	Yes	No	No	No	No	Yes	Yes	No	Yes	No	Postdoc	Reported to my institution/body responsible for your institution		Other
1	Principal Investigator
1	Principal Investigator	Male	White	36-45	Can't remember	Can't remember	Can't remember	Can't remember	Can't remember	Very often	Can't remember	Very often	Moderately	Can't remember	Can't remember	Occasionally	Moderately	Moderately	Moderately	Yes	No	No	Yes	Yes	No	No	No	No	Yes	Graduate Student	Used code of silence (did not report)	Fear of retaliation
1	Department Chair	Female	White	36-45	Very often	Very often	Very often	Very often	Very often	Very often	Very often	Very often	Very often	Very often	Very often	Very often	Very often	Very often	Very often	Yes	No	No	No	Yes	No	No	No	No	Yes	Other	Reported to my institution/body responsible for your institution		Unfair and biased	187	5
1	Department Chair	Male	White	46-55	Seldom	Occasionally	Can't remember	Can't remember	Seldom	Moderately	Occasionally	Can't remember		Can't remember	Occasionally	Moderately	Very often	Can't remember	Occasionally	No	No	No	Yes	No	No	No	No	No	Yes	Other	Sought support from colleagues/friends/family		Unfair and biased	31
1	Principal Investigator	Male	White	46-55	Occasionally	Very often	Very often	Occasionally	Very often	Very often	Very often	Seldom	Very often	Can't remember	Very often	Can't remember	Very often	Very often	Moderately	No	No	Yes	Yes	No	Yes	Yes	Yes	Yes	No	Graduate Student	Used code of silence (did not report)	Fear of retaliation
1	Department Chair	Male	White	Over 66	Can't remember	Moderately	Occasionally	Moderately	Can't remember	Moderately	Can't remember	Can't remember	Can't remember	Can't remember	Moderately	Can't remember	Very often	Can't remember	Can't remember	Yes	No	No	No	No	No	No	No	No	Yes	Other	Reported to my institution/body responsible for your institution	Fear of retaliation	Unfair and biased
1	Principal Investigator	Male	Asian	46-55						Occasionally	Occasionally	Very often			Moderately		Very often	Very often	Very often	Yes		Yes				Yes				Graduate Student	Sought support from colleagues/friends/family		Unfair and biased
1	Department Chair
1	Principal Investigator
1	Principal Investigator
1	Department Chair
1	Principal Investigator
1	Group Leader
1
1	Principal Investigator	Female	White	56-65	Occasionally	Occasionally	Moderately	Can't remember	Seldom	Occasionally	Occasionally	Can't remember	Occasionally	Seldom	Occasionally	Occasionally	Very often	Very often	Very often	Yes	No	No	No	Yes	Yes	No	No	Yes	Yes	Postdoc	Used code of silence (did not report)	Fear of being fired	Unfair and biased	187	21
1	Principal Investigator	Female	East Indian	36-45	Occasionally	Very often	Occasionally	Seldom	Very often	Occasionally	Occasionally	Very often	Can't remember	Can't remember	Can't remember	Can't remember	Can't remember	Occasionally	Very often	Yes	Yes	No	Yes	No	No	No	No	No	Yes	Postdoc	Reported to my institution/body responsible for your institution	Other	Unfair and biased	187	5
1	Group Leader	Male	Hispanic	56-65	Occasionally	Occasionally	Can't remember	Can't remember	Moderately	Moderately	Occasionally	Seldom	Can't remember	Can't remember	Seldom	Seldom	Very often	Can't remember	Can't remember	No	No	No	No	No	No	No	No	No	No	Visiting Scientist/Researcher	Used code of silence (did not report)	Fear of being fired		187	5
1	Principal Investigator
1	Principal Investigator	Male	White0	36-45	Very often	Very often	Very often	Very often	Occasionally	Very often	Very often	Occasionally	Occasionally	Seldom	Moderately	Very often	Very often	Can't remember	Occasionally	No	No	Yes	Yes	Yes	No	No			Yes	Postdoc	Sought support from colleagues/friends/family	Fear of retaliation	Other	78	53
1	Principal Investigator	Male	White	36-45				Moderately		Occasionally						Occasionally					Yes	Yes		Yes					Yes	Postdoc	Sought support from colleagues/friends/family	Fear of retaliation	Unfair and biased	187	33
1	Principal Investigator
1
1	Principal Investigator	Female	White	36-45	Moderately	Very often	Very often	Occasionally	Very often	Very often	Very often	Very often	Very often	Very often	Very often	Very often	Very often	Very often	Very often	Yes	No	No	Yes	Yes	Yes	Yes	Yes	Yes	Yes	Graduate Student	Reported to my institution/body responsible for your institution	Fear of being fired	Unfair and biased
1	Group Leader
1	Department Chair	Male	White	46-55															Moderately	No	Yes	No	No	No	No	Yes	No	No	No	Graduate Student	Reported to my institution/body responsible for your institution	Other	Unfair and biased	187	39
1	Department Chair	Male	White	Over 66	Very often	Occasionally	Moderately	Moderately	Moderately	Moderately	Moderately	Moderately	Occasionally		Moderately
1	Principal Investigator	Male	White	56-65	Moderately	Can't remember	Occasionally	Very often	Occasionally	Seldom	Occasionally	Seldom	Moderately	Occasionally	Very often	Can't remember	Very often	Can't remember	Can't remember	No	No	No	No	No	No	Yes	No	No	No	Postdoc	Used code of silence (did not report)	Fear of being fired	Unfair and biased
1	Department Chair
1	Principal Investigator
1	Principal Investigator
1	Lab Supervisor
1	Principal Investigator	Male	White	46-55	Moderately	Moderately	Very often	Very often	Very often	Very often	Very often	Very often	Very often	Occasionally	Very often	Very often	Very often	Very often	Very often	Yes	No	Yes	Yes	Yes	Yes	Yes	Yes	Yes	No	Graduate Student	Used code of silence (did not report)	Fear of retaliation	Other	65
1	Principal Investigator
1	Principal Investigator	Male	Asian	46-55	Can't remember	Moderately	Seldom	Seldom	Seldom	Seldom	Seldom	Moderately	Can't remember	Can't remember	Seldom	Seldom	Seldom	Moderately	Moderately	Yes	No	Yes	Yes	No	No	No	No	Yes	Yes	Graduate Student	Sought support from colleagues/friends/family	Fear of retaliation		187	7
1
1	Principal Investigator	Female	White	46-55	Can't remember	Very often	Can't remember	Seldom	Seldom	Occasionally	Seldom	Moderately	Very often	Seldom	Very often	Moderately	Very often	Very often	Moderately	No	No	No	Yes	No	Yes	Yes	No	Yes	No	Graduate Student	Reported to my institution/body responsible for your institution	Fear of retaliation	Other
1	Group Leader
1	Department Chair
1	Principal Investigator
1	Principal Investigator
1	Group Leader
1	Principal Investigator	Female	White	Over 66			Very often	Very often	Very often		Very often																			Postdoc	Sought support from colleagues/friends/family	Fear of retaliation	Fair and unbiased
1	Department Chair
1	Principal Investigator
1	Group Leader	Male	White	46-55	Seldom	Can't remember	Seldom	Seldom	Can't remember	Occasionally	Occasionally	Occasionally	Very often	Seldom	Very often	Seldom	Very often	Very often	Very often	Yes	No	No	No	No	No	Yes	No	No	No	Visiting Scientist/Researcher	Sought support from colleagues/friends/family	Fear of being fired
1
1	Department Chair
1	Department Chair
1	Principal Investigator
1	Principal Investigator
1	Department Chair
1	Department Chair	Female	White
1	Lab Supervisor
1	Principal Investigator
1	Department Chair
1	Group Leader
1	Principal Investigator	Male	White	56-65	Seldom	Seldom	Occasionally	Seldom	Moderately	Occasionally	Occasionally	Occasionally	Occasionally	Can't remember	Moderately	Can't remember	Very often	Occasionally	Can't remember	No	No	Yes	No	Yes	No	No	No	No	No	Graduate Student	Sought support from colleagues/friends/family	Fear of being fired
1	Principal Investigator	Male	Asian	36-45	Occasionally	Seldom	Very often	Very often	Can't remember	Very often	Very often	Can't remember	Seldom	Can't remember	Very often	Occasionally	Very often	Very often	Can't remember	No	Yes	Yes	No	No	Yes	No	Yes	No	No	Graduate Student	Used code of silence (did not report)	Fear of retaliation	Unfair and biased	187	45
1	Lab Supervisor	Female	White	46-55
1	Principal Investigator
1	Principal Investigator
1	Department Chair	Other genders	White0	36-45	Very often		Very often		Can't remember		Very often	Can't remember	Moderately	Very often	Very often	Very often	Very often	Moderately	Very often	Yes	No	No	Yes	Yes	No	Yes	Yes	Yes	Yes	Graduate Student	Reported to my institution/body responsible for your institution		Unfair and biased
1	Principal Investigator	Female	White	56-65	Very often	Occasionally	Moderately	Moderately	Very often	Very often	Very often	Very often	Can't remember	Moderately	Moderately	Very often	Very often	Very often	Seldom	No	No	Yes	No	Yes	No	No	Yes	Yes	No	Postdoc	Used code of silence (did not report)	Fear of retaliation		187	5
1	Group Leader
1	Group Leader
1	Principal Investigator	Female	White	46-55	Seldom						Can't remember									No	No	No	Yes	No	Yes	No	No	No	No	Graduate Student	Used code of silence (did not report)	Fear of retaliation	Unfair and biased
1	Principal Investigator	Female	White	36-45	Moderately	Moderately	Occasionally	Occasionally	Moderately	Occasionally	Very often	Very often	Can't remember	Can't remember	Seldom	Can't remember	Very often	Can't remember	Can't remember	Yes	No	No	No	No	No	No	No	No	No	Graduate Student	Sought support from colleagues/friends/family	Fear of retaliation	Other	31
1	Principal Investigator	Male	Asian	56-65	Very often	Very often	Very often	Very often	Very often	Very often	Very often	Very often	Very often	Seldom	Very often	Very often	Very often	Occasionally	Occasionally	Yes	No	No	No	Yes	No	No	Yes	No	No	Graduate Student	Sought support from colleagues/friends/family	Other	Other	187	5
1	Principal Investigator	Female	White	46-55	Very often	Very often	Seldom	Very often	Occasionally	Very often		Occasionally	Very often	Can't remember	Moderately	Seldom	Very often	Can't remember	Can't remember	Yes	No	No	No	Yes	Yes	No	No	No	Yes	Postdoc	Used code of silence (did not report)	Fear of being fired		185
1	Lab Supervisor	Female	White	46-55	Can't remember	Very often	Can't remember	Occasionally	Can't remember	Can't remember	Occasionally	Can't remember	Very often	Occasionally	Occasionally	Very often	Very often	Very often	Very often	Yes	No	Yes	No	No	No	No	No	No	No	Visiting Scientist/Researcher	Reported to my institution/body responsible for your institution
1	Principal Investigator	Female	White	56-65	Very often	Moderately	Moderately	Very often	Very often	Moderately	Very often	Moderately	Very often	Seldom	Moderately	Seldom	Moderately	Occasionally	Can't remember	Yes	No	Yes	No	No	Yes	Yes	No	No	Yes	Graduate Student	Used code of silence (did not report)	Fear of retaliation		185
1	Principal Investigator	Female	Middle Eastern	36-45	Can't remember	Moderately	Seldom	Moderately	Can't remember	Can't remember	Can't remember	Moderately	Can't remember	Seldom	Moderately	Can't remember	Moderately	Very often	Very often	No	No	No	No	No	Yes	Yes	No	No	No	Postdoc	Reported to my institution/body responsible for your institution	Other	Other	187	5
1	Department Chair	Male	White	36-45	Very often	Occasionally	Very often	Moderately	Can't remember	Very often	Very often	Seldom	Very often	Very often	Very often	Very often	Very often	Seldom	Very often	Yes	No	No	Yes	Yes	Yes	Yes	Yes	Yes	No	Graduate Student	Reported to my institution/body responsible for your institution	Other	Unfair and biased
1	Principal Investigator	Male	White	36-45	Seldom	Can't remember	Can't remember	Can't remember	Seldom	Can't remember	Seldom	Seldom	Occasionally	Can't remember	Can't remember	Seldom	Occasionally	Very often	Very often	No	No	No	No	No	No	Yes	No	No	Yes	Postdoc	Sought support from colleagues/friends/family	Other	Other	187	33
1	Principal Investigator
1	Group Leader	Male	White	36-45	Can't remember	Can't remember	Can't remember	Can't remember	Moderately	Moderately	Can't remember	Moderately	Very often	Very often	Very often	Moderately	Moderately	Very often	Very often	Yes	No	No	Yes	Yes	No	Yes	No	No	No	Postdoc	Other	Fear of retaliation	Other
1	Principal Investigator
1	Group Leader	Female	White	56-65	Can't remember	Occasionally	Can't remember	Can't remember	Moderately	Very often	Occasionally	Seldom	Occasionally	Can't remember	Can't remember	Can't remember	Can't remember	Moderately	Moderately	No	No	No	Yes	No	No	No	No	No	No	Other	Sought support from colleagues/friends/family	Fear of retaliation		187	34
1	Principal Investigator	Male	Asian	36-45	Moderately	Very often	Very often	Very often	Very often	Very often	Very often	Very often	Very often	Moderately	Very often	Occasionally	Very often	Very often	Very often	No	Yes	Yes	Yes	Yes	Yes	Yes	Yes	Yes	Yes	Graduate Student	Reported to my institution/body responsible for your institution		Other	187	10
1	Lab Supervisor	Female	White	46-55	Occasionally		Can't remember	Can't remember	Seldom	Occasionally	Can't remember	Can't remember	Seldom	Can't remember	Seldom	Can't remember	Seldom	Can't remember	Seldom	Yes	No	No	No					Yes	No	Graduate Student	Sought support from colleagues/friends/family	Fear of retaliation		31
1	Principal Investigator	Male	Asian	25-35	Seldom	Seldom	Occasionally	Seldom	Moderately	Seldom	Occasionally	Seldom	Seldom	Very often	Moderately	Very often	Seldom	Seldom	Seldom	Yes	No	Yes	Yes	No	No	No	Yes	Yes	No	Postdoc	Sought support from colleagues/friends/family	Fear of retaliation	Unfair and biased	187	33
1	Department Chair	Male	White	46-55	Occasionally	Seldom	Can't remember	Can't remember	Can't remember	Very often	Occasionally	Can't remember	Can't remember	Occasionally	Very often	Occasionally	Can't remember	Moderately	Very often	Yes	No	No	No	Yes	Yes	No	No	Yes	No	Postdoc	Reported to my institution/body responsible for your institution	Other	Unfair and biased	9
1	Department Chair
1	Principal Investigator	Male	Middle Eastern	25-35	Occasionally	Can't remember	Occasionally	Seldom	Moderately	Occasionally	Occasionally	Occasionally	Can't remember	Occasionally	Very often	Occasionally	Very often	Very often	Very often	Yes	No	Yes	Yes	No	Yes	Yes	Yes	Yes	Yes	Undergraduate Student	Reported to my institution/body responsible for your institution		Unfair and biased	80
1	Principal Investigator	Male	White	Over 66	Seldom	Moderately	Occasionally	Occasionally	Occasionally	Can't remember	Seldom	Moderately	Can't remember	Can't remember	Can't remember	Moderately	Occasionally	Very often	Seldom	Yes	No	Yes	No	No	No	No	No	No	No	Graduate Student	Reported to my institution/body responsible for your institution		Other	187	34
1	Principal Investigator	Male	White	36-45	Seldom	Can't remember	Occasionally	Can't remember	Moderately	Can't remember	Seldom	Can't remember	Very often	Can't remember	Seldom	Can't remember	Can't remember	Very often	Moderately	No	No	No	No	No	No	No	No	No	No	Graduate Student	Sought support from colleagues/friends/family	Fear of retaliation		187	34
1	Principal Investigator	Male	White	46-55	Occasionally	Occasionally	Seldom	Can't remember	Moderately	Can't remember	Occasionally	Can't remember	Occasionally	Can't remember	Can't remember	Can't remember	Seldom	Very often	Occasionally	No	No	Yes	No	No	No	No	No	No	No	Graduate Student	Sought support from colleagues/friends/family	Fear of retaliation		187	34
1	Department Chair	Female	White	25-35	Can't remember	Moderately	Seldom	Occasionally	Very often	Occasionally	Seldom	Moderately	Can't remember	Can't remember	Can't remember	Can't remember	Occasionally	Can't remember	Can't remember	No	No	No	No	No	No	No	No	No	No	Other	Used code of silence (did not report)	Fear of retaliation	Other	187	34
1	Principal Investigator	Female	White	36-45	Very often	Can't remember	Moderately	Occasionally	Very often	Moderately	Very often	Moderately	Can't remember	Can't remember	Occasionally	Very often	Seldom	Very often	Very often	No	No	No	No	Yes	No	Yes	No	Yes	No	Postdoc	Used code of silence (did not report)	Fear of being fired	Other	48
1	Department Chair	Female	White	25-35	Can't remember	Can't remember	Can't remember	Can't remember	Can't remember	Very often	Very often	Can't remember	Very often	Occasionally	Can't remember	Can't remember	Can't remember	Can't remember	Moderately	No	No	No	No	Yes	No	No	No	No	No	Graduate Student	Sought support from colleagues/friends/family	Other	Unfair and biased	187	34
1	Group Leader	Female	White	Over 66	Can't remember	Can't remember	Can't remember	Seldom	Moderately	Very often	Occasionally	Very often	Very often	Very often	Very often	Can't remember	Very often	Very often	Very often	Yes	No	No	Yes	Yes	No	Yes	No	No	Yes	Visiting Scientist/Researcher	Sought support from colleagues/friends/family	Fear of retaliation	Other	24	53
1	Principal Investigator	Male	White	46-55	Very often	Very often	Occasionally	Occasionally	Moderately	Very often	Very often	Seldom	Seldom	Can't remember	Can't remember	Can't remember	Very often	Occasionally	Very often	No	Yes	No	Yes	No	No	No	No	No	Yes	Postdoc	Reported to my institution/body responsible for your institution		Unfair and biased	187	22
1	Principal Investigator	Male	East Indian	46-55	Occasionally	Very often	Seldom	Moderately	Very often	Moderately	Very often	Occasionally	Very often	Can't remember	Can't remember	Can't remember	Moderately	Moderately	Moderately	Yes	No	Yes	No	No	No	Yes	No	No	No	Graduate Student	Used code of silence (did not report)	Fear of retaliation		187	14
1	Principal Investigator	Male	White0	46-55	Very often	Very often	Moderately	Moderately	Very often	Very often	Very often	Very often	Moderately	Occasionally	Very often	Moderately	Very often	Moderately	Occasionally	No	No	Yes	Yes	Yes	Yes	Yes	No	Yes	Yes	Graduate Student	Used code of silence (did not report)	Fear of retaliation	Other	78
1	Department Chair	Male	White	46-55	Very often	Seldom	Seldom	Moderately	Moderately	Moderately	Moderately	Seldom	Seldom	Seldom	Occasionally	Occasionally	Occasionally	Seldom	Seldom	Yes	No	No	Yes	No	No	No	No	No	Yes	Other	Sought support from colleagues/friends/family	Fear of retaliation	Unfair and biased	9
1	Principal Investigator	Male	Middle Eastern	46-55	Occasionally	Moderately	Seldom	Moderately	Moderately	Very often	Very often	Occasionally	Seldom	Seldom	Seldom	Moderately	Moderately	Moderately	Moderately	Yes	No	Yes	Yes	No	Yes	Yes	Yes	Yes	Yes	Postdoc	Reported to my institution/body responsible for your institution	Other	Unfair and biased
1	Principal Investigator	Male	White	46-55	Very often	Can't remember	Very often	Can't remember	Can't remember	Very often	Very often	Very often	Can't remember	Can't remember	Very often	Can't remember	Very often	Occasionally	Very often	Yes	No	No	No	No	No	No	Yes	No	Yes	Graduate Student	Reported to my institution/body responsible for your institution		Unfair and biased	185
1	Group Leader
1	Group Leader	Female	White	56-65	Very often	Very often	Occasionally	Moderately	Seldom	Very often	Very often	Very often	Seldom	Seldom	Very often	Seldom	Very often	Moderately	Occasionally	Yes	No	No	Yes	Yes	No	No	No	No	Yes	Other	Other	Other	Other	185
1	Principal Investigator
1	Lab Supervisor	Male	Asian	36-45	Occasionally	Can't remember	Can't remember	Occasionally	Very often	Very often	Occasionally	Occasionally	Occasionally	Moderately	Very often	Occasionally	Very often	Moderately	Moderately	No	No	Yes	No	Yes	No	No	No	No	No	Postdoc	Sought support from colleagues/friends/family		Other
1	Principal Investigator	Male	Middle Eastern	46-55	Moderately	Moderately	Very often	Occasionally	Very often	Very often	Very often	Very often	Very often	Very often	Moderately	Moderately	Very often	Moderately	Occasionally	No	No	Yes	Yes	No	No	No	No	No	Yes	Graduate Student	Reported to my institution/body responsible for your institution	Fear of retaliation	Unfair and biased	187	45
1	Group Leader	Male	White	Over 66	Very often	Very often	Very often	Very often	Very often	Very often	Very often	Very often	Very often	Can't remember	Very often	Very often	Very often	Very often	Very often	Yes	Yes	Yes	Yes	Yes	Yes	Yes	Yes	Yes	Yes	Postdoc	Used code of silence (did not report)	Visa issues	Unfair and biased	187	45
1	Principal Investigator	Male	White	46-55	Occasionally	Very often	Very often	Very often	Seldom	Occasionally	Occasionally	Moderately	Very often	Seldom	Moderately	Seldom	Very often	Very often	Moderately	Yes	Yes	No	Yes	No	Yes	Yes	No	No	Yes	Graduate Student	Used code of silence (did not report)	Fear of retaliation	Unfair and biased	83	53
1	Principal Investigator	Male	Asian	56-65	Occasionally	Occasionally	Seldom	Seldom	Moderately	Occasionally	Occasionally	Seldom	Can't remember	Can't remember	Seldom	Occasionally	Occasionally	Very often	Occasionally	No	No	Yes	Yes	Yes	No	Yes	No		Yes	Graduate Student	Used code of silence (did not report)	Fear of retaliation
1	Department Chair	Male	East Indian	25-35	Very often	Moderately	Can't remember	Moderately	Can't remember	Very often	Very often	Very often	Very often	Very often	Very often	Very often	Very often	Very often	Very often	Yes	No	No	No	Yes	Yes	Yes	No	Yes	No	Postdoc	Reported to my institution/body responsible for your institution		Fair and unbiased
1	Principal Investigator
1
1	Principal Investigator	Female	Asian	36-45	Very often	Very often	Very often	Very often	Very often	Very often	Very often	Very often	Can't remember	Can't remember	Occasionally	Can't remember	Moderately	Moderately	Very often	Yes	No	Yes	Yes	Yes	Yes	Yes	No	Yes	Yes	Graduate Student	Reported to my institution/body responsible for your institution	Other	Fair and unbiased
1	Principal Investigator	Male	White	46-55	Moderately	Very often	Very often	Very often	Occasionally	Very often	Occasionally	Very often	Very often	Occasionally	Very often	Can't remember	Very often	Very often	Very often	No	No	No	Yes	Yes	No	Yes	No	No	No	Visiting Scientist/Researcher	Sought support from colleagues/friends/family	Fear of retaliation		24
1	Principal Investigator
1	Principal Investigator	Female	White	36-45	Occasionally	Seldom	Seldom	Seldom	Occasionally	Occasionally	Occasionally	Seldom	Moderately	Very often	Occasionally	Seldom	Moderately	Very often	Very often	No	No	Yes	Yes	No	No	No	No	No	No	Graduate Student	Sought support from colleagues/friends/family	Fear of retaliation		185
1	Principal Investigator	Other genders	White0	46-55	Moderately	Moderately	Moderately	Very often	Moderately	Can't remember	Moderately	Can't remember	Can't remember	Can't remember	Very often	Can't remember	Moderately	Can't remember	Can't remember	Yes	No	No	Yes	No	Yes	No	No	No	No	Other	Sought support from colleagues/friends/family	Fear of retaliation
1	Department Chair	Other genders	White	46-55	Very often	Occasionally	Occasionally	Very often	Occasionally	Very often	Very often	Can't remember	Can't remember	Can't remember	Very often	Very often	Very often	Very often	Very often	Yes	No	No	Yes	Yes	Yes	Yes	Yes	Yes	Yes	Other	Reported to my institution/body responsible for your institution	Other	Unfair and biased	185	53
1	Department Chair
1	Group Leader	Male	White	56-65	Seldom	Occasionally	Can't remember	Can't remember	Moderately	Very often	Very often	Very often	Very often	Occasionally	Very often	Moderately	Very often	Very often	Very often	Yes	No	No	Yes	Yes	Yes	Yes	No	Yes	Yes	Other	Reported to my institution/body responsible for your institution		Other	187	11
1	Principal Investigator
1	Principal Investigator
1	Department Chair	Female	Black or African American	36-45	Very often	Seldom	Can't remember	Can't remember	Occasionally	Very often	Very often	Very often		Moderately		Very often	Very often	Very often	Very often	Yes	Yes			Yes	Yes	Yes	Yes	Yes	Yes	Postdoc	Used code of silence (did not report)	Other	Unfair and biased	187	16
1	Lab Supervisor	Male	White	36-45	Seldom	Moderately	Moderately	Moderately	Moderately	Very often	Very often	Very often	Very often	Occasionally	Very often	Seldom	Very often	Occasionally	Moderately	Yes	No	Yes	No	Yes	Yes	No	No	No	No	Visiting Scientist/Researcher	Used code of silence (did not report)	Fear of retaliation	Other	84	53
1	Principal Investigator	Female	East Indian	36-45	Very often	Very often	Can't remember	Occasionally	Can't remember	Very often	Very often	Can't remember	Can't remember	Can't remember	Seldom	Can't remember	Moderately	Moderately	Occasionally	No	No	No	No	Yes	No	No	No	No	No	Postdoc	Used code of silence (did not report)	Other		187	5
1	Principal Investigator	Male	White	46-55	Can't remember		Can't remember		Seldom		Seldom		Occasionally		Moderately		Moderately		Very often							Yes				Postdoc	Other	Other		10
1	Department Chair	Male	White	56-65	Moderately	Very often	Occasionally	Very often	Occasionally	Very often	Very often	Can't remember	Can't remember	Occasionally	Very often	Can't remember	Very often	Very often	Moderately	Yes	No	No	Yes	Yes	No	No	No	No	No	Other	Reported to my institution/body responsible for your institution		Other	187	5
1	Principal Investigator	Female	Asian	46-55	Very often	Very often	Moderately	Moderately	Very often	Very often	Very often	Very often	Moderately	Seldom	Occasionally	Can't remember	Occasionally	Can't remember	Can't remember	No	No	No	Yes	Yes	No	No	No	No	Yes	Graduate Student	Reported to my institution/body responsible for your institution		Unfair and biased	187	48
1	Principal Investigator
1	Group Leader	Male	White	56-65	Can't remember	Can't remember	Can't remember	Can't remember	Can't remember	Very often	Can't remember	Can't remember	Can't remember	Can't remember	Very often	Can't remember	Very often	Can't remember	Very often	Yes	No	No	Yes	Yes	No	Yes	No	Yes	Yes	Other	Reported to my institution/body responsible for your institution		Other
1	Principal Investigator	Male	White	46-55	Occasionally	Very often	Occasionally	Very often	Very often	Very often	Seldom	Can't remember	Moderately	Can't remember	Very often	Can't remember	Moderately	Can't remember	Can't remember	No	No	Yes	Yes	No	No	No	No	No	Yes	Postdoc	Reported to my institution/body responsible for your institution		Unfair and biased	187	22
1	Principal Investigator
1	Principal Investigator	Male	White	46-55	Can't remember	Occasionally	Seldom	Can't remember	Can't remember	Seldom	Can't remember	Seldom	Occasionally	Can't remember	Very often	Can't remember	Very often	Moderately	Occasionally	No	No	Yes	No	No	No	Yes	No	No	No	Postdoc	Sought support from colleagues/friends/family	Other	Unfair and biased
1	Principal Investigator	Female	White	36-45	Very often	Moderately	Moderately	Very often	Very often	Very often	Very often	Very often	Very often	Moderately	Very often	Can't remember	Very often	Very often	Very often	Yes	No	Yes	No	Yes	Yes	No	Yes	No	Yes	Postdoc	Sought support from colleagues/friends/family	Other	Other	111
1	Department Chair	Male	White	46-55	Seldom	Seldom	Occasionally	Occasionally	Moderately	Very often	Occasionally	Very often	Occasionally	Seldom	Very often	Can't remember	Very often	Very often	Very often	No	No	No	No	Yes	No	No	No	No	Yes	Graduate Student	Reported to my institution/body responsible for your institution		Unfair and biased	31
1	Group Leader	Male	White	46-55	Seldom	Moderately	Occasionally	Seldom	Seldom	Very often	Seldom	Very often	Moderately	Moderately	Seldom	Occasionally	Seldom	Moderately	Moderately	Yes	No	No	No	Yes	No	No	No	No	No	Graduate Student	Reported to my institution/body responsible for your institution	Other	Unfair and biased
1	Principal Investigator
1	Group Leader	Female	White	56-65	Occasionally	Very often	Moderately	Very often	Seldom	Very often	Moderately	Moderately	Can't remember	Can't remember	Moderately	Can't remember	Moderately	Moderately	Very often	Yes	No	No	No	No	No	No	No	No	Yes	Postdoc	Sought support from colleagues/friends/family	Other	Other
1	Principal Investigator	Male	White	36-45	Occasionally	Seldom	Occasionally	Occasionally	Very often	Very often	Seldom	Moderately	Moderately	Can't remember	Seldom	Can't remember	Seldom	Can't remember	Can't remember	No	No	No	No	No	No	No	No	No	Yes	Visiting Scientist/Researcher	Other	Fear of retaliation	Unfair and biased
1	Department Chair	Prefer not to specify	White	36-45	Seldom	Occasionally	Occasionally	Can't remember	Moderately	Moderately	Seldom	Occasionally	Moderately	Can't remember	Seldom	Seldom	Seldom	Moderately	Very often	No	No	No	No	Yes	No	No	No	No	No	Other	Reported to my institution/body responsible for your institution		Other
1	Principal Investigator	Female	White	46-55	Seldom	Moderately	Seldom	Seldom	Moderately	Moderately	Moderately	Very often	Seldom	Very often	Occasionally	Very often	Very often	Very often	Seldom	No	No	Yes	Yes	No	No	Yes	No	No	Yes	Graduate Student	Sought support from colleagues/friends/family	Fear of retaliation		122
1	Principal Investigator
1	Group Leader	Female	White	46-55	Occasionally	Seldom	Occasionally	Occasionally	Seldom	Seldom	Occasionally	Occasionally	Seldom	Moderately	Seldom	Moderately	Occasionally	Seldom	Occasionally	No	No	No	Yes	No	No	Yes	Yes	No	No	Graduate Student	Sought support from colleagues/friends/family	Fear of retaliation	Unfair and biased
1	Principal Investigator	Male	East Indian	36-45	Seldom	Very often	Moderately	Moderately	Very often	Very often	Moderately	Very often	Seldom	Very often	Very often	Very often	Very often	Very often	Very often	Yes	Yes	Yes	Yes	Yes	No	No	No	No	Yes	Postdoc	Used code of silence (did not report)	Fear of retaliation	Other	187	37
1	Principal Investigator
1	Principal Investigator	Female	White	Over 66	Occasionally	Very often	Very often	Moderately	Moderately	Seldom	Occasionally	Occasionally	Can't remember	Can't remember	Occasionally	Can't remember	Occasionally	Moderately	Moderately	Yes	No	Yes	No	No	Yes	Yes	No	No	No	Graduate Student	Sought support from colleagues/friends/family	Fear of retaliation	Other	187	5
1	Department Chair
1	Group Leader
1	Principal Investigator	Male	White	46-55	Very often	Very often	Very often	Very often	Very often	Moderately	Very often	Moderately	Can't remember	Can't remember	Very often	Can't remember	Very often	Moderately	Can't remember	No	No	No	No	Yes	No	No	No	No	Yes	Graduate Student	Used code of silence (did not report)	Fear of being fired	Other
1	Group Leader
1	Principal Investigator	Female	American Indian or Alaska Native	46-55	Moderately	Moderately	Occasionally	Seldom	Very often	Moderately	Moderately	Occasionally	Occasionally	Very often	Occasionally	Can't remember	Moderately	Occasionally	Moderately	Yes	Yes	Yes	No	No	Yes	Yes	No	Yes	No	Postdoc	Sought support from colleagues/friends/family	Fear of retaliation
1	Principal Investigator
1	Principal Investigator
1	Group Leader
1	Department Chair
1	Principal Investigator
1	Principal Investigator
1	Lab Supervisor	Male	White	46-55	Occasionally	Very often		Very often	Seldom	Seldom	Can't remember	Can't remember	Very often	Can't remember	Occasionally	Can't remember	Seldom	Occasionally	Occasionally	Yes	Yes	No	No	Yes	No	Yes	Yes	Yes	Yes	Postdoc	Reported to my institution/body responsible for your institution	Visa issues	Unfair and biased
1	Department Chair	Male	White	25-35											Very often		Very often								Yes	Yes		Yes		Graduate Student	Reported to my institution/body responsible for your institution		Other	48
1	Principal Investigator	Male	White	36-45	Moderately	Very often	Occasionally	Seldom	Very often	Very often	Seldom	Moderately	Occasionally	Can't remember	Can't remember	Very often	Can't remember	Can't remember	Can't remember	Yes	No	No	No	Yes	Yes	No	No	No	Yes	Postdoc	Reported to my institution/body responsible for your institution		Other	187	32
1	Lab Supervisor
1	Department Chair	Male	Hispanic	36-45	Moderately	Occasionally	Occasionally	Occasionally	Very often	Can't remember	Occasionally	Occasionally	Can't remember	Can't remember	Occasionally	Occasionally	Moderately	Moderately	Can't remember	No	No	No	No	No	No	No	No	No	No	Graduate Student	Sought support from colleagues/friends/family	Other	Other	187	33
1	Group Leader	Male	White	46-55	Seldom	Can't remember	Can't remember	Can't remember	Can't remember	Occasionally	Occasionally	Occasionally	Seldom	Can't remember	Can't remember	Seldom	Moderately	Occasionally	Seldom	No	No	Yes	No	No	No	No	Yes	No	No	Graduate Student	Sought support from colleagues/friends/family	Fear of retaliation	Fair and unbiased
1	Principal Investigator
1	Principal Investigator	Male	White	36-45	Occasionally	Seldom	Can't remember	Can't remember	Seldom	Occasionally	Seldom	Can't remember	Very often	Occasionally	Very often	Can't remember	Moderately	Can't remember	Can't remember	Yes	No	Yes	Yes	Yes	No	Yes	No	Yes	Yes	Postdoc	Sought support from colleagues/friends/family	Fear of retaliation	Unfair and biased	65
1	Principal Investigator	Male	White	Over 66	Occasionally	Very often	Occasionally	Moderately	Seldom	Occasionally	Moderately	Seldom	Occasionally	Seldom	Moderately	Can't remember	Very often	Seldom	Can't remember	No	No	Yes	Yes	No	No	No	No	No	Yes	Graduate Student	Sought support from colleagues/friends/family	Fear of retaliation	Other	187	44
1	Group Leader	Female	White	46-55	Occasionally	Moderately	Can't remember	Can't remember	Occasionally	Occasionally	Can't remember	Moderately	Occasionally	Can't remember	Can't remember	Can't remember	Moderately	Moderately	Seldom	Yes	No	No	No	No	No	No	No	No	Yes	Other	Used code of silence (did not report)	Fear of retaliation		187	16
1	Lab Supervisor	Male	White	56-65	Occasionally	Moderately	Moderately	Moderately	Very often	Very often	Very often	Very often	Moderately	Very often	Very often	Very often	Very often	Very often	Very often	Yes	No	Yes	No	Yes	Yes	Yes	No	Yes	No	Graduate Student	Reported to my institution/body responsible for your institution		Unfair and biased	169
1	Group Leader
1	Principal Investigator	Male	White	56-65	Seldom	Moderately	Seldom	Can't remember	Occasionally	Occasionally	Seldom	Occasionally	Seldom	Seldom	Occasionally	Occasionally	Moderately	Seldom	Seldom	Yes	No	Yes	No	No	No	No	No	No	Yes	Graduate Student	Sought support from colleagues/friends/family	Fear of retaliation	Fair and unbiased	187	44
1	Lab Supervisor	Male	Asian	46-55											Seldom															Graduate Student	Sought support from colleagues/friends/family	Other		136
1	Department Chair	Male	East Indian	36-45	Seldom	Moderately	Occasionally	Very often	Occasionally	Very often	Moderately	Very often	Very often	Occasionally	Very often	Can't remember	Moderately	Very often		Yes										Undergraduate Student	Sought support from colleagues/friends/family	Fear of retaliation	Unfair and biased
1	Principal Investigator	Male	White	46-55	Moderately	Moderately	Very often	Very often	Very often	Moderately	Occasionally	Very often	Very often	Very often	Very often	Moderately	Very often	Very often	Very often	No	No	Yes	No	Yes	No	Yes	No	Yes	No	Postdoc	Reported to my institution/body responsible for your institution		Unfair and biased	65
1	Group Leader	Female	Asian	56-65	Very often	Very often	Seldom	Very often	Very often	Very often	Very often	Very often	Very often	Very often	Very often	Very often	Very often	Very often	Very often	No	No	Yes	No	Yes	Yes	Yes	Yes	Yes	Yes	Postdoc	Sought support from colleagues/friends/family	Fear of being fired	Fair and unbiased
1	Principal Investigator	Male	White	36-45	Moderately	Occasionally	Very often	Moderately	Very often	Moderately	Seldom	Very often	Very often	Occasionally	Very often	Can't remember	Very often	Very often	Moderately	Yes	No	Yes	No	No	Yes	No	No	Yes	No	Postdoc	Used code of silence (did not report)	Fear of retaliation		82
1	Group Leader	Female	White0	36-45	Occasionally	Very often	Occasionally	Very often	Very often	Can't remember	Seldom	Very often	Very often	Very often	Can't remember	Can't remember	Can't remember	Moderately	Very often	No	Yes	No	No	No	No	No	No	No	Yes	Visiting Scientist/Researcher	Sought support from colleagues/friends/family	Visa issues
1	Principal Investigator	Male	White0	46-55	Occasionally	Occasionally	Occasionally	Can't remember	Moderately	Occasionally	Occasionally	Can't remember	Can't remember	Occasionally	Occasionally	Very often	Can't remember	Moderately	Moderately	Yes	No	Yes	Yes	No	No	Yes	No	No	Yes	Other	Used code of silence (did not report)	Fear of retaliation	Other
1	Group Leader	Male	White	56-65	Seldom	Can't remember	Moderately	Occasionally	Can't remember	Very often	Moderately	Moderately	Seldom	Moderately	Very often	Moderately	Occasionally	Can't remember	Very often	Yes	No	No	No	Yes	No	No	Yes	No	No	Other	Reported to my institution/body responsible for your institution		Unfair and biased	185
1	Principal Investigator
1	Department Chair
1	Department Chair
1	Department Chair	Female	Asian	36-45	Moderately	Very often	Very often	Moderately	Moderately	Very often	Moderately	Very often	Moderately	Very often	Moderately	Occasionally	Seldom	Very often	Very often	Yes	No	No	No	Yes	No	No	No	No	Yes	Graduate Student	Sought support from colleagues/friends/family	Other	Other	36
1	Group Leader
1	Group Leader	Male	White	36-45	Seldom	Occasionally	Can't remember	Occasionally	Moderately	Very often	Very often	Very often	Very often	Can't remember	Can't remember	Very often	Very often	Very often	Moderately	Yes	No	No	No	Yes	No	No	No	No	No	Visiting Scientist/Researcher	Sought support from colleagues/friends/family	Fear of retaliation	Unfair and biased	169
1	Department Chair
1	Principal Investigator	Female	White	36-45	Can't remember	Can't remember	Can't remember	Can't remember	Can't remember	Moderately	Seldom	Moderately	Can't remember	Can't remember	Occasionally	Can't remember	Moderately	Very often	Moderately	No	No	No	Yes	No	No	No	No	No	Yes	Other	Sought support from colleagues/friends/family	Fear of retaliation		31
1	Principal Investigator
1	Principal Investigator	Female	White	56-65	Very often	Very often	Very often	Very often	Very often	Very often	Very often	Very often	Very often	Very often	Very often	Very often	Very often	Very often	Very often	Yes	No	Yes	Yes	Yes	Yes	Yes	No	Yes	Yes	Graduate Student	Sought support from colleagues/friends/family	Fear of retaliation	Fair and unbiased	187	14
1	Principal Investigator	Male	White	46-55	Can't remember	Can't remember	Can't remember	Can't remember	Can't remember	Seldom	Seldom	Can't remember	Can't remember	Can't remember	Occasionally	Seldom	Occasionally	Can't remember	Can't remember	No	No	No	No	Yes	No	No	No	No	No	Other	Sought support from colleagues/friends/family	Other	Unfair and biased	187	3
1	Lab Supervisor	Male	White	36-45	Moderately	Can't remember	Seldom	Can't remember	Occasionally	Seldom	Moderately	Can't remember	Occasionally	Can't remember	Can't remember	Occasionally	Can't remember	Can't remember	Can't remember	No	No	No	No	Yes	No	No	No	No	No	Postdoc	Other		Fair and unbiased	185
1	Principal Investigator	Male	Hispanic	46-55	Occasionally	Can't remember	Can't remember	Can't remember	Seldom	Occasionally	Occasionally	Can't remember	Occasionally	Can't remember	Can't remember	Can't remember	Can't remember	Occasionally	Can't remember	No	No	No	No	No	No	No	No	No	No	Undergraduate Student	Sought support from colleagues/friends/family	Other	Other	111
1	Group Leader	Other genders	White	36-45	Occasionally	Occasionally	Occasionally	Can't remember	Occasionally	Moderately	Moderately	Very often	Very often	Very often	Very often	Very often	Very often	Very often	Very often	Yes	No	No	Yes	Yes	Yes	Yes	No	No	Yes		Other		Unfair and biased	60
1	Principal Investigator	Female	Black or African American	46-55	Occasionally	Seldom	Occasionally	Can't remember	Moderately	Occasionally	Moderately	Moderately	Occasionally	Very often	Can't remember	Can't remember	Can't remember	Can't remember	Occasionally	Yes	No	No	No	Yes	No	No	No	No	No	Graduate Student	Sought support from colleagues/friends/family	Fear of retaliation		187
1	Principal Investigator	Male	White	Over 66	Occasionally	Seldom	Can't remember	Can't remember	Occasionally	Occasionally	Moderately	Moderately	Moderately	Seldom	Occasionally	Occasionally	Occasionally	Moderately	Moderately	Yes	No	Yes	No	No	Yes	Yes	No	No	No	Graduate Student	Sought support from colleagues/friends/family	Fear of retaliation		187
1	Principal Investigator	Male	East Indian	46-55	Very often	Occasionally	Moderately	Moderately	Can't remember	Moderately	Very often	Can't remember	Occasionally	Very often	Can't remember	Moderately	Seldom	Occasionally	Very often	Yes	No	No	No	Yes	No	No	No	No	Yes	Postdoc	Used code of silence (did not report)	Other	Other	65
1	Department Chair	Male	White	Over 66									Very often	Moderately	Occasionally		Moderately	Very often	Very often			Yes		Yes		Yes			Yes	Graduate Student	Reported to my institution/body responsible for your institution	Other	Unfair and biased
1	Department Chair	Female	White	25-35	Moderately	Very often	Occasionally	Moderately	Moderately	Very often	Very often	Moderately	Occasionally	Seldom	Seldom	Can't remember	Very often	Moderately	Very often	Yes	No	No	No	Yes	No	Yes	No	No	No	Graduate Student	Reported to my institution/body responsible for your institution		Unfair and biased	187	26
1	Principal Investigator	Male	Asian	36-45	Moderately	Occasionally	Moderately	Moderately	Seldom	Moderately	Moderately	Moderately	Seldom	Seldom	Very often	Seldom	Moderately	Moderately	Occasionally	No	No	Yes	No	No	Yes	No	Yes	Yes	No	Graduate Student	Reported to my institution/body responsible for your institution		Other	36
1	Principal Investigator
1	Principal Investigator
1	Group Leader	Male	White	46-55	Can't remember	Can't remember	Can't remember	Can't remember	Moderately	Moderately	Occasionally	Very often	Very often	Very often	Very often	Can't remember	Very often	Very often	Very often	No	Yes	No	Yes	No	No	No	No	Yes	Yes	Postdoc	Used code of silence (did not report)	Fear of retaliation	Other	123
1	Principal Investigator	Male	White	46-55	Moderately	Can't remember	Can't remember	Can't remember	Occasionally	Very often	Moderately	Very often	Very often	Occasionally	Occasionally	Occasionally	Seldom	Moderately	Very often	Yes	No	No	No	Yes	No	No	No	No	Yes	Other	Other	Other	Unfair and biased	185
1	Principal Investigator
1	Department Chair	Male	White	36-45					Very often	Very often	Very often	Very often	Very often	Very often										Yes						Other	Reported to my institution/body responsible for your institution		Unfair and biased	169
1	Group Leader	Prefer not to specify	White	46-55	Occasionally	Occasionally	Occasionally	Can't remember	Very often	Seldom	Can't remember	Can't remember	Moderately	Can't remember	Can't remember	Very often	Can't remember	Very often	Very often	Yes	Yes	No	Yes	Yes	Yes	Yes	Yes	Yes	Yes	Postdoc	Used code of silence (did not report)	Fear of being fired		187	33
1	Department Chair
1	Principal Investigator	Male	White	56-65	Occasionally	Very often	Seldom	Moderately	Can't remember	Can't remember	Seldom	Can't remember	Occasionally	Can't remember	Seldom	Can't remember	Moderately	Occasionally	Can't remember	No	No	Yes	Yes	No	No	No	No	No	No	Graduate Student	Reported to my institution/body responsible for your institution		Other	187	5
1
1	Lab Supervisor	Female	White	36-45	Very often	Moderately	Can't remember	Very often	Can't remember	Very often	Very often	Very often	Very often	Very often	Very often	Can't remember	Very often	Very often	Very often	No	No	No	No	Yes	No	No	No	No	Yes	Postdoc	Other	Other	Unfair and biased	153
1	Department Chair	Male	White	25-35	Moderately	Can't remember	Can't remember	Can't remember	Occasionally	Very often	Seldom	Seldom	Very often	Seldom	Seldom	Occasionally	Seldom	Very often	Very often	Yes	No	No	No	Yes	No	No	No	No	No	Postdoc	Sought support from colleagues/friends/family	Fear of retaliation	Fair and unbiased
1	Department Chair
1	Group Leader
1	Principal Investigator	Male	East Indian	56-65	Occasionally	Occasionally	Very often	Moderately	Seldom	Can't remember	Occasionally	Occasionally	Can't remember	Can't remember	Occasionally	Occasionally	Moderately	Occasionally	Moderately	No	No	No	No	No	Yes	No	No	No	No	Postdoc	Sought support from colleagues/friends/family	Fear of retaliation		187	5
1	Principal Investigator	Male	Asian	36-45	Seldom	Very often	Seldom	Very often	Very often	Can't remember	Can't remember	Seldom	Seldom	Seldom	Seldom	Very often	Moderately	Very often	Very often	No	No	No	No	No	No	No	No	No	Yes	Graduate Student	Reported to my institution/body responsible for your institution	Fear of being fired	Unfair and biased
1	Lab Supervisor	Female	White	36-45	Occasionally	Occasionally	Moderately	Can't remember	Moderately	Can't remember	Occasionally	Moderately	Occasionally	Can't remember	Moderately	Very often	Very often	Very often	Occasionally	No	No	No	No	Yes	No	No	No	Yes	No	Graduate Student			Other
1	Group Leader	Male	Black or African American	46-55	Very often	Moderately	Seldom	Can't remember	Moderately	Very often	Moderately	Occasionally	Moderately	Occasionally	Moderately	Moderately	Moderately	Very often	Very often	Yes		No	No	Yes	Yes	No		No	Yes	Other	Reported to my institution/body responsible for your institution	Fear of being fired	Unfair and biased
1	Principal Investigator
1	Principal Investigator
1	Group Leader	Male	White	Over 66	Very often	Very often	Very often	Moderately	Very often	Very often	Very often	Very often	Moderately	Very often	Very often	Can't remember	Very often	Seldom	Occasionally	Yes	Yes	No	Yes	Yes	Yes	No	No	Yes	Yes	Visiting Scientist/Researcher	Used code of silence (did not report)	Fear of retaliation	Unfair and biased	65
1	Group Leader	Female	White	56-65	Seldom	Occasionally	Moderately	Moderately	Very often	Moderately	Moderately	Occasionally	Moderately	Seldom	Very often	Occasionally	Very often	Very often	Moderately	Yes	No	Yes	No	Yes	No	No	No	Yes	No	Postdoc	Sought support from colleagues/friends/family	Fear of being fired		143
1	Lab Supervisor	Female	White	36-45	Can't remember	Can't remember	Can't remember	Seldom	Very often	Very often	Very often	Can't remember	Very often	Can't remember	Very often	Moderately	Very often	Very often	Very often	Yes	No	No	Yes	Yes	No	No	No	No	Yes	Postdoc	Sought support from colleagues/friends/family	Fear of being fired	Unfair and biased	185
1	Principal Investigator	Male	White	36-45	Very often	Very often	Very often	Very often	Very often	Very often	Very often	Can't remember	Can't remember	Can't remember	Can't remember	Can't remember	Can't remember	Can't remember	Can't remember	No	No	No	No	No	No	No	No	No	No	Postdoc	Used code of silence (did not report)	Other		187	36
1	Principal Investigator	Male	White	Over 66	Occasionally	Moderately	Occasionally	Moderately	Occasionally	Moderately	Moderately	Can't remember	Seldom	Can't remember	Seldom	Seldom	Very often	Very often	Very often	No	No	Yes	Yes	No	No	No	No	No	Yes	Graduate Student	Sought support from colleagues/friends/family	Fear of retaliation
1	Department Chair
1	Principal Investigator
1	Department Chair
1	Principal Investigator
1	Group Leader
1	Principal Investigator	Male	White	36-45	Can't remember	Seldom	Can't remember	Can't remember	Very often	Can't remember	Seldom	Can't remember	Can't remember	Can't remember	Can't remember	Can't remember	Can't remember	Can't remember	Can't remember	No	No	No	No	No	No	No	No	No	No	Visiting Scientist/Researcher	Used code of silence (did not report)	Other	Unfair and biased	187	21
1	Group Leader
1	Principal Investigator	Female	White	46-55	Very often	Very often	Very often	Very often	Very often	Very often	Very often	Very often	Very often	Very often	Very often	Very often	Very often	Very often	Very often	Yes	No	Yes	No	Yes	Yes	Yes	Yes	Yes	Yes	Graduate Student	Reported to my institution/body responsible for your institution		Unfair and biased	31
1	Department Chair	Male	White0	25-35	Moderately	Occasionally	Seldom	Seldom	Moderately	Moderately	Occasionally	Moderately	Very often	Moderately	Occasionally	Can't remember	Occasionally	Moderately	Very often	No	No	No	No	No	No	No	No	No	No	Graduate Student	Used code of silence (did not report)	Fear of being fired
1	Principal Investigator	Female	White	25-35	Very often	Very often	Very often	Very often	Moderately	Very often	Very often	Very often	Very often	Very often	Moderately	Very often	Moderately	Very often	Very often	Yes	No	Yes	Yes	Yes	Yes	Yes	Yes	Yes	Yes	Graduate Student	Reported to my institution/body responsible for your institution		Unfair and biased	36
1	Principal Investigator	Female	White	25-35	Occasionally	Seldom	Occasionally	Occasionally	Occasionally	Very often	Moderately	Very often	Can't remember	Occasionally	Occasionally	Very often	Seldom	Very often	Very often	Yes	No	Yes	Yes	Yes	No	No	Yes	No	No	Graduate Student	Reported to my institution/body responsible for your institution		Unfair and biased	36
1	Department Chair	Female	White	36-45	Moderately	Occasionally	Occasionally	Moderately	Occasionally	Very often	Very often	Moderately	Very often	Very often	Very often	Occasionally	Very often	Very often	Very often	Yes	No	No	No	No	Yes	Yes	No	Yes	Yes	Other	Reported to my institution/body responsible for your institution	Other	Unfair and biased
1	Department Chair	Female	White	46-55	Moderately	Moderately	Very often	Occasionally	Very often	Very often	Very often	Moderately	Very often	Seldom	Very often	Very often	Very often	Very often	Very often	No	No	Yes	Yes	Yes	No	Yes	No	No	No	Other	Used code of silence (did not report)	Fear of being fired	Other	45
1	Principal Investigator	Female	White	36-45	Can't remember	Seldom	Seldom	Seldom	Moderately	Can't remember	Seldom	Seldom	Can't remember	Can't remember	Occasionally	Occasionally	Moderately	Moderately	Can't remember	No	No	No	No	No	No	No	No	No	Yes	Graduate Student	Used code of silence (did not report)	Fear of retaliation	Unfair and biased
1	Principal Investigator	Male	White	36-45	Occasionally	Very often	Moderately	Very often	Can't remember	Moderately	Moderately	Moderately	Very often	Moderately	Very often	Occasionally	Very often	Very often	Very often	Yes	No	No	Yes	Yes	Yes	Yes	Yes	Yes	Yes	Graduate Student	Used code of silence (did not report)	Visa issues	Other	31
1	Group Leader	Female	White	46-55	Very often	Very often	Very often	Very often	Very often	Very often	Very often	Very often	Very often	Very often	Very often	Very often	Very often	Very often	Very often	Yes	No	No	Yes	Yes	Yes	Yes	Yes	Yes	Yes	Other	Sought support from colleagues/friends/family	Fear of being fired	Other
1	Department Chair	Female	White	36-45	Occasionally		Moderately	Seldom	Seldom	Moderately	Moderately	Moderately	Very often		Very often	Moderately	Moderately	Moderately	Very often	Yes	No	No	No	Yes	Yes	No	No	Yes	No	Postdoc	Sought support from colleagues/friends/family	Other	Other	10
1	Group Leader	Male	White	36-45	Occasionally	Moderately	Seldom	Seldom	Occasionally	Occasionally	Occasionally	Very often	Seldom	Seldom	Very often	Very often	Very often	Very often	Very often	Yes	Yes	No	No	Yes	Yes	No	Yes	Yes	Yes	Graduate Student	Used code of silence (did not report)	Fear of retaliation		122
1	Principal Investigator	Female	White	46-55	Very often	Very often	Very often	Very often	Very often	Very often	Very often	Very often	Very often	Very often	Very often	Can't remember	Very often	Very often	Very often	Yes	No	Yes	Yes	Yes	Yes	Yes	Yes	No	Yes	Graduate Student	Used code of silence (did not report)	Fear of retaliation	Fair and unbiased	10	53
1	Principal Investigator	Female	Middle Eastern	Over 66	Can't remember	Very often	Can't remember	Seldom	Can't remember	Moderately	Can't remember	Very often	Can't remember	Occasionally	Can't remember	Can't remember	Occasionally	Occasionally	Very often	No	No	No	No	No	No	No	No	No	Yes	Postdoc	Reported to my institution/body responsible for your institution		Fair and unbiased
1	Department Chair
1
1	Department Chair	Male	White	36-45	Seldom	Seldom	Seldom	Can't remember	Seldom	Can't remember	Seldom	Seldom	Seldom	Can't remember	Can't remember	Can't remember	Seldom	Seldom	Occasionally	No	No	Yes	No	No	No	No	No	Yes	Yes	Other	Reported to my institution/body responsible for your institution	Other	Unfair and biased
1	Principal Investigator	Female	White	Over 66	Occasionally	Occasionally	Seldom	Seldom	Occasionally	Very often	Occasionally	Occasionally	Moderately	Very often	Very often	Occasionally	Very often	Very often	Very often	Yes	No	No	Yes	Yes	No	Yes	Yes	Yes	Yes		Other	Fear of retaliation	Unfair and biased	9
1	Principal Investigator	Male	White	46-55	Very often	Moderately	Seldom	Occasionally	Occasionally	Moderately	Very often	Moderately	Occasionally	Moderately	Very often	Seldom	Very often	Very often	Very often	Yes	No	Yes	Yes	Yes	Yes	Yes	Yes	Yes	Yes	Graduate Student	Used code of silence (did not report)	Fear of retaliation		65
1	Principal Investigator	Male	White	36-45	Occasionally	Can't remember	Can't remember	Occasionally	Very often	Can't remember	Seldom	Can't remember	Very often	Can't remember	Can't remember	Very often	Can't remember	Occasionally	Seldom	No	No	No	No	No	No	No	No	No	No	Graduate Student	Sought support from colleagues/friends/family	Fear of retaliation		185
1	Group Leader	Male	White	46-55	Can't remember	Can't remember	Can't remember	Can't remember	Can't remember	Very often	Can't remember	Very often	Very often	Very often	Can't remember	Can't remember	Can't remember	Can't remember	Very often	Yes	No	No	Yes	Yes	No	No	No	No	Yes	Other	Reported to my institution/body responsible for your institution		Unfair and biased	185
1	Group Leader	Male	White	25-35	Occasionally	Seldom	Seldom	Can't remember	Occasionally	Occasionally	Seldom	Occasionally	Seldom	Can't remember	Can't remember	Can't remember	Can't remember	Can't remember	Can't remember	No	No	No	No	No	No	No	No	No	No	Graduate Student	Sought support from colleagues/friends/family	Fear of retaliation	Unfair and biased	185
1	Principal Investigator	Female	White	46-55	Occasionally	Moderately	Can't remember	Can't remember	Occasionally	Occasionally	Occasionally	Moderately	Can't remember	Can't remember	Seldom	Can't remember	Occasionally	Occasionally	Can't remember	No	No	No	No	No	Yes	Yes	No	Yes	No	Graduate Student	Sought support from colleagues/friends/family	Fear of retaliation
1	Principal Investigator
1	Principal Investigator	Male	Asian	56-65	Seldom	Occasionally	Occasionally	Seldom	Seldom	Seldom	Seldom	Occasionally	Occasionally	Seldom	Occasionally	Seldom	Occasionally	Occasionally	Occasionally	No	No	No	Yes	Yes	Yes	Yes	No	Yes	Yes	Postdoc	Sought support from colleagues/friends/family	Fear of retaliation
1	Department Chair
1	Group Leader
1	Department Chair
1	Department Chair
1	Department Chair
1	Department Chair
1
1
1	Principal Investigator	Male	White	Over 66	Can't remember	Can't remember	Seldom	Can't remember	Moderately	Moderately	Seldom	Occasionally	Occasionally	Can't remember	Can't remember	Can't remember	Can't remember	Occasionally	Can't remember	No	No	No	No	No	No	No	No	No	Yes	Graduate Student	Used code of silence (did not report)	Fear of retaliation	Other	187	45
1	Principal Investigator	Male	Mixed Race	36-45	Very often	Very often	Very often	Very often	Very often	Moderately	Moderately	Occasionally	Can't remember	Seldom	Moderately	Seldom	Very often	Very often	Very often	Yes	Yes	No	Yes	Yes	No	No	Yes	No	Yes	Postdoc	Sought support from colleagues/friends/family	Fear of retaliation	Unfair and biased	187	49
1	Department Chair	Male	White	36-45
1	Principal Investigator	Female	White	46-55	Moderately	Very often	Seldom	Very often	Very often	Very often	Very often	Very often	Very often	Seldom	Moderately	Seldom	Seldom	Seldom	Seldom	No	No	No	No	Yes	No	No	No	No	No	Visiting Scientist/Researcher	Reported to my institution/body responsible for your institution	Other	Unfair and biased
1	Group Leader
1	Principal Investigator	Male	Asian	36-45	Very often	Very often	Moderately	Very often	Moderately	Very often	Very often	Can't remember	Can't remember	Very often	Very often	Very often	Very often	Very often	Very often	No	No	Yes	No	Yes	No	No	No	Yes	Yes	Postdoc	Sought support from colleagues/friends/family	Fear of being fired	Unfair and biased	139
1		Prefer not to specify
1	Principal Investigator
1	Group Leader
1	Group Leader	Male	White	Over 66	Very often	Moderately	Moderately	Can't remember	Can't remember	Very often	Very often	Very often	Very often	Very often	Can't remember	Very often	Can't remember	Can't remember	Very often	Yes	No	No	No	Yes	No	No	No	No	No	Other	Reported to my institution/body responsible for your institution		Unfair and biased	187	33
1	Principal Investigator	Female	White	46-55	Moderately	Moderately	Seldom	Moderately	Moderately	Moderately	Very often	Occasionally	Moderately	Moderately	Very often	Moderately	Very often	Very often	Very often	Yes	No	No	Yes	Yes	No	No	Yes	Yes	Yes	Postdoc	Reported to my institution/body responsible for your institution		Other	187	33
1	Group Leader	Male	White	56-65						Moderately	Moderately			Moderately	Very often		Very often		Moderately					Yes					Yes	Other	Other	Other	Unfair and biased	65
1	Lab Supervisor	Male	Asian	25-35	Occasionally	Occasionally	Moderately	Moderately	Occasionally	Moderately	Occasionally	Seldom	Very often	Can't remember	Very often	Seldom	Seldom	Can't remember	Can't remember	No	No	No	No	No	No	No	No	No	No	Graduate Student	Reported to my institution/body responsible for your institution	Other	Unfair and biased	65
1	Department Chair	Other genders	White	56-65	Seldom	Can't remember	Can't remember	Can't remember	Can't remember	Moderately	Can't remember	Can't remember	Can't remember	Can't remember	Can't remember	Can't remember	Moderately	Moderately	Moderately	Yes	No	No	No	Yes	No	No	No	No	No	Graduate Student	Other	Other	Other	187	23
1	Lab Supervisor	Male	Black or African American	46-55	Moderately	Very often	Moderately	Moderately	Moderately	Occasionally	Moderately	Moderately	Very often	Moderately	Very often		Moderately	Very often	Very often	Yes	No	No	Yes	Yes	No	No	No	No	Yes	Graduate Student	Used code of silence (did not report)	Other	Other	31
1	Lab Supervisor
1	Department Chair	Male	Asian	36-45	Very often	Can't remember	Can't remember	Can't remember	Very often	Very often	Very often	Very often	Very often	Very often	Very often	Very often	Very often	Very often	Very often	No	No	No	No	Yes	No	No	No	No	No	Other	Reported to my institution/body responsible for your institution	Other	Unfair and biased	185
1	Principal Investigator	Male	White	56-65				Very often							Very often			Very often	Very often	Yes			Yes		Yes	Yes	Yes	Yes	Yes	Visiting Scientist/Researcher	Reported to my institution/body responsible for your institution		Unfair and biased	187	5
1	Principal Investigator	Male	White	36-45	Very often	Very often	Seldom	Very often	Very often	Occasionally	Very often	Can't remember	Very often	Occasionally	Very often	Very often	Very often	Moderately	Very often	No	No	No	No	Yes	No	No	No	Yes	Yes	Graduate Student	Other	Fear of retaliation	Unfair and biased	187	24
1	Department Chair
1	Lab Supervisor
1	Principal Investigator	Other genders	White	46-55	Seldom	Seldom	Can't remember	Can't remember	Occasionally	Occasionally	Seldom	Seldom	Moderately	Occasionally	Very often	Seldom				Yes	No	Yes	Yes	Yes	No	Yes	No	No	Yes	Postdoc	Sought support from colleagues/friends/family	Fear of retaliation	Unfair and biased	31	44
1	Principal Investigator	Female	White	46-55	Moderately	Moderately	Seldom	Can't remember	Moderately	Moderately	Moderately	Occasionally	Moderately	Occasionally	Very often	Moderately	Moderately	Very often	Very often	Yes	No	No	Yes	No	Yes	Yes	No	Yes	Yes	Postdoc	Reported to my institution/body responsible for your institution	Fear of being fired	Other	187	21
1	Department Chair
1	Principal Investigator	Male	White	46-55	Moderately	Very often	Occasionally	Very often	Very often	Moderately	Moderately	Very often	Seldom	Can't remember	Seldom	Can't remember	Seldom	Very often	Very often	Yes	No	No	Yes	No	No		No	No	Yes	Postdoc	Used code of silence (did not report)	Fear of retaliation	Unfair and biased	187	22
1	Principal Investigator
1	Principal Investigator
1	Department Chair
1
1	Principal Investigator	Male	White	Over 66	Occasionally	Occasionally	Very often	Moderately	Can't remember	Can't remember	Very often	Moderately	Very often	Can't remember	Very often	Can't remember	Very often	Very often	Very often	No	No	No	No	No	No	Yes	No	No	No	Graduate Student	Sought support from colleagues/friends/family	Fear of retaliation		185
1	Group Leader	Male	White	46-55	Very often	Moderately	Seldom	Seldom	Very often	Very often	Seldom	Very often	Very often	Very often	Very often	Very often	Very often	Very often	Very often	Yes	No	Yes	No	Yes	No	No	No	No	Yes	Postdoc	Sought support from colleagues/friends/family		Unfair and biased	187	39
1	Lab Supervisor	Male	White	56-65	Very often	Seldom	Can't remember	Very often	Very often	Very often	Very often	Can't remember	Very often	Very often	Can't remember	Can't remember	Very often	Very often	Very often	No	Yes	Yes	Yes	Yes	No	No	No	No	No	Postdoc	Used code of silence (did not report)	Fear of retaliation	Fair and unbiased
1	Principal Investigator
1	Department Chair
1	Lab Supervisor
1	Principal Investigator	Male	White	46-55	Occasionally	Can't remember	Can't remember	Can't remember	Moderately	Moderately	Moderately	Occasionally	Very often	Occasionally	Can't remember	Can't remember	Occasionally	Seldom	Occasionally	Yes	No	No	No	Yes	No	No	No	No	No	Postdoc	Reported to my institution/body responsible for your institution		Unfair and biased	123
1	Department Chair	Female	White	46-55	Very often	Very often	Moderately	Very often	Seldom	Very often	Very often	Very often	Seldom	Seldom	Very often	Very often	Very often	Very often	Very often	No	No	Yes	No	Yes	No	No	No	No	Yes	Other	Used code of silence (did not report)	Fear of retaliation		187	34
1	Group Leader	Male	White	56-65	Moderately	Occasionally	Moderately	Occasionally	Moderately	Moderately	Moderately	Occasionally	Very often	Very often	Very often	Very often	Very often	Very often	Very often	Yes	No	Yes	Yes	Yes	Yes	Yes	Yes	Yes	Yes	Other	Reported to my institution/body responsible for your institution	Other	Unfair and biased	48	53
1	Principal Investigator	Male	White	56-65	Occasionally	Moderately	Seldom	Moderately	Very often	Very often	Seldom	Can't remember	Very often	Very often	Very often	Seldom	Moderately	Very often	Very often	Yes	No	No	Yes	Yes	Yes	No	No	No	Yes	Postdoc	Sought support from colleagues/friends/family	Fear of retaliation		82
1	Principal Investigator	Male	Asian	46-55	Occasionally	Seldom	Occasionally	Very often	Seldom	Can't remember	Seldom	Seldom	Can't remember	Can't remember	Can't remember	Seldom	Occasionally	Moderately	Moderately	No	No	No	Yes	No	No	No	No	No	Yes	Graduate Student	Used code of silence (did not report)	Fear of retaliation	Other	187	48
1	Group Leader	Male	White	56-65	Very often	Moderately	Very often	Very often	Very often	Very often	Very often	Moderately	Very often	Occasionally	Occasionally	Moderately	Moderately	Occasionally	Very often	Yes	No	No	Yes	Yes	Yes	No	No	Yes	Yes	Other	Sought support from colleagues/friends/family	Fear of retaliation	Other	187	25
1	Principal Investigator	Male	White	56-65	Very often	Very often	Very often	Very often	Very often	Very often	Very often	Very often	Occasionally	Occasionally	Can't remember	Occasionally	Occasionally	Occasionally	Can't remember	No	No	No	Yes	Yes	No	No	No	No	Yes		Used code of silence (did not report)	Fear of retaliation
1	Principal Investigator	Female	White	46-55	Very often	Very often	Moderately	Very often	Very often	Moderately	Very often	Very often	Very often	Seldom	Very often	Very often	Very often	Very often	Very often	Yes	No	No	Yes	Yes	Yes	Yes	Yes	Yes	Yes	Other	Reported to my institution/body responsible for your institution		Unfair and biased	187	22
1	Principal Investigator	Female	White	56-65	Occasionally	Occasionally	Moderately	Occasionally	Very often	Occasionally	Occasionally	Moderately	Can't remember	Moderately	Seldom	Occasionally	Seldom	Can't remember	Seldom	No	No	Yes	Yes	No	No	Yes	No	No	No	Graduate Student	Sought support from colleagues/friends/family	Fear of being fired		187	5
1	Group Leader	Female	White	Over 66	Occasionally	Moderately	Seldom	Moderately	Moderately	Moderately	Occasionally	Very often	Very often	Very often	Very often	Seldom	Very often	Very often	Very often	Yes	No	No	Yes	Yes	No	No	No	No	Yes	Other	Used code of silence (did not report)	Fear of retaliation		187	44
1	Principal Investigator	Female	White	56-65	Very often	Very often	Very often	Very often	Very often	Very often	Very often	Very often	Very often	Seldom	Very often	Very often	Very often	Very often	Very often	Yes	No	Yes	No	Yes	No	Yes	No	Yes	No	Graduate Student	Reported to my institution/body responsible for your institution	Other	Unfair and biased	187	10
1	Principal Investigator	Female	White	46-55	Very often	Very often	Very often	Moderately	Very often	Very often	Very often	Very often	Moderately	Moderately	Very often	Very often	Very often		Very often	Yes	No	No	Yes	Yes	Yes	Yes	No	Yes	Yes	Postdoc	Reported to my institution/body responsible for your institution		Other	187
1	Group Leader	Female	White	56-65	Very often	Very often			Very often	Very often	Very often	Very often	Very often	Very often			Very often	Very often	Very often	Yes	Yes			Yes					Yes	Other	Sought support from colleagues/friends/family		Unfair and biased	187	21
1	Group Leader	Female	White	56-65	Can't remember	Occasionally	Can't remember	Can't remember	Occasionally	Very often	Can't remember		Occasionally	Moderately	Very often	Seldom	Very often	Very often	Very often	Yes	No	No	Yes	Yes	Yes	Yes	No	Yes	Yes	Other	Sought support from colleagues/friends/family	Fear of retaliation	Unfair and biased	9
1	Principal Investigator	Male	East Indian	56-65	Moderately	Occasionally	Occasionally	Occasionally	Very often	Very often	Very often	Very often	Very often	Very often	Very often	Can't remember	Very often	Very often	Very often	Yes	No	No	No	Yes	No	Yes	No	No	No	Other	Sought support from colleagues/friends/family	Fear of retaliation	Unfair and biased	187	5
1	Department Chair	Female	Asian	25-35	Moderately	Occasionally	Seldom	Seldom	Very often	Very often	Very often	Can't remember	Very often	Can't remember	Occasionally	Can't remember	Occasionally	Occasionally	Occasionally	No	No	No	No	No	No	No	No	No	No	Other	Sought support from colleagues/friends/family	Other	Unfair and biased	172
1	Principal Investigator	Female	Hispanic	36-45		Occasionally		Moderately	Moderately	Moderately	Moderately	Moderately	Moderately	Can't remember	Moderately	Seldom	Moderately	Very often	Very often		No		Yes		Yes	Yes			Yes		Reported to my institution/body responsible for your institution		Unfair and biased	187	5
1	Principal Investigator	Female	White	46-55	Can't remember	Occasionally	Can't remember	Can't remember	Seldom	Can't remember	Can't remember	Seldom	Occasionally	Can't remember	Seldom	Can't remember	Can't remember	Occasionally	Seldom	Yes	No	No	Yes	No	Yes	Yes	No	No	Yes	Graduate Student	Sought support from colleagues/friends/family	Fear of retaliation	Unfair and biased	187	5
1	Group Leader	Female	White	46-55	Very often	Very often	Occasionally	Very often	Very often	Very often	Very often	Very often	Occasionally	Moderately	Very often	Very often	Very often	Very often	Very often	Yes	No	No	Yes	Yes	No	No	Yes	Yes	Yes	Other	Reported to my institution/body responsible for your institution		Other	187	39
1	Department Chair	Male	White	56-65	Very often	Moderately	Seldom	Seldom	Very often	Very often	Very often	Very often	Seldom	Very often	Very often	Very often	Very often	Seldom	Very often	Yes	No	Yes	Yes	Yes	Yes	No	No	No	Yes	Other	Sought support from colleagues/friends/family	Fear of retaliation	Other	187	5
1	Department Chair	Female	White	56-65	Can't remember	Can't remember	Can't remember	Seldom	Moderately	Seldom	Can't remember	Can't remember	Very often	Moderately	Moderately	Can't remember	Moderately	Seldom	Moderately	No	No	No	No	No	No	No	No	No	No	Postdoc	Used code of silence (did not report)	Fear of retaliation		48
1	Department Chair	Female	White	56-65	Moderately	Occasionally	Moderately	Moderately	Very often	Very often	Moderately	Moderately	Seldom	Very often	Moderately	Moderately	Moderately	Very often	Very often	No	No	No	No	No	No	No	No	No	No	Graduate Student	Reported to my institution/body responsible for your institution		Unfair and biased	48
1	Lab Supervisor	Female	Asian	46-55	Moderately	Can't remember	Can't remember	Occasionally	Moderately	Seldom	Seldom	Can't remember	Seldom	Can't remember	Can't remember	Moderately	Can't remember	Moderately	Can't remember										Yes	Graduate Student	Reported to my institution/body responsible for your institution		Other	130
1	Principal Investigator	Male	White	46-55	Very often	Occasionally	Very often	Very often	Seldom	Seldom	Very often	Occasionally	Can't remember	Can't remember	Seldom	Can't remember	Very often	Can't remember	Can't remember	Yes	No	No	No	No	No	No	No	No	No	Undergraduate Student	Sought support from colleagues/friends/family	Fear of retaliation	Unfair and biased	138
1	Department Chair	Female	White	46-55	Very often		Very often		Very often		Very often	Very often	Very often	Very often		Very often	Very often	Very often	Very often	Yes				Yes						Graduate Student	Used code of silence (did not report)	Other	Other	84
1	Principal Investigator	Female	White	46-55	Can't remember	Can't remember	Can't remember	Can't remember	Can't remember	Moderately	Can't remember	Can't remember	Can't remember	Can't remember	Moderately	Seldom	Moderately	Occasionally	Very often	No	No	No	No	No	Yes	Yes	No	Yes	No	Postdoc	Used code of silence (did not report)	Fear of retaliation	Other	168
1	Principal Investigator	Female	White	56-65	Very often	Very often	Very often	Moderately	Very often	Very often	Very often	Moderately	Very often	Very often	Very often	Very often	Very often	Very often	Very often	Yes	No	Yes	Yes	Yes	Yes	Yes	No	Yes	Yes	Postdoc	Reported to my institution/body responsible for your institution		Unfair and biased	138
1	Department Chair	Male	White	36-45	Occasionally	Occasionally	Moderately	Moderately	Moderately	Moderately	Occasionally	Occasionally	Can't remember	Can't remember	Can't remember	Moderately	Occasionally	Moderately	Seldom	No	No	No	Yes	Yes	No	No	No	No	Yes	Graduate Student	Reported to my institution/body responsible for your institution		Unfair and biased	84
1	Principal Investigator	Male	White	25-35	Moderately	Seldom	Seldom	Seldom	Occasionally	Very often	Occasionally	Very often	Occasionally	Occasionally	Very often	Can't remember	Very often	Very often	Very often	Yes			Yes	Yes	Yes	Yes	Yes	Yes	No	Graduate Student	Reported to my institution/body responsible for your institution	Fear of retaliation	Unfair and biased	187	34
1	Principal Investigator	Male	White	46-55	Can't remember	Can't remember	Can't remember	Can't remember	Moderately	Occasionally	Occasionally	Very often			Can't remember	Can't remember	Can't remember	Very often		No	No	Yes	No	No	Yes		No	No	No	Graduate Student	Sought support from colleagues/friends/family	Fear of retaliation	Other	187	41
1	Department Chair	Male	White	25-35	Moderately	Seldom	Moderately	Moderately	Moderately	Very often	Very often	Very often	Very often	Occasionally	Moderately	Moderately	Moderately	Seldom	Moderately	No	No	No	No	Yes	No	No	No	No	Yes	Graduate Student	Reported to my institution/body responsible for your institution		Unfair and biased	187
1	Department Chair	Male	White	46-55	Very often	Can't remember	Very often	Very often	Seldom	Very often	Very often	Very often	Seldom	Very often	Very often	Seldom	Very often	Seldom	Seldom	Yes	Yes	No	Yes	Yes	No	Yes	No	No	Yes	Other	Used code of silence (did not report)	Fear of being fired	Unfair and biased	187	5
1	Principal Investigator	Female	White	46-55	Occasionally	Very often	Occasionally	Can't remember	Moderately	Very often	Moderately	Can't remember	Very often	Can't remember	Moderately	Occasionally	Seldom	Very often	Very often	Yes	Yes	No	Yes	Yes	Yes	Yes	No	Yes	Yes	Graduate Student	Used code of silence (did not report)	Fear of retaliation	Other	187	22
1	Principal Investigator	Male	White	36-45	Occasionally	Seldom	Very often	Seldom	Occasionally	Occasionally	Very often	Seldom	Can't remember	Can't remember	Very often	Moderately	Very often	Very often	Very often	No	No	Yes	Yes	Yes	Yes	Yes	No	Yes	Yes	Postdoc	Sought support from colleagues/friends/family	Fear of retaliation		84
1	Principal Investigator	Female	Hispanic	46-55	Seldom	Occasionally	Can't remember	Can't remember	Moderately	Very often	Occasionally	Very often	Very often	Very often	Very often	Moderately	Very often	Very often	Occasionally	Yes	No	Yes	No	Yes	No	No	Yes	No	No	Postdoc	Sought support from colleagues/friends/family	Fear of retaliation	Unfair and biased
1	Department Chair	Female	White	46-55	Seldom	Moderately	Seldom	Seldom	Moderately	Very often	Seldom	Moderately	Seldom	Seldom	Occasionally	Moderately	Very often	Moderately	Moderately	Yes	No	No	No	Yes	No	No	No	No	No	Other	Sought support from colleagues/friends/family	Fear of retaliation		187	34
1	Department Chair	Male	White	46-55	Seldom	Seldom	Very often	Occasionally	Can't remember	Seldom	Can't remember	Seldom	Occasionally	Can't remember	Very often	Can't remember	Very often	Occasionally	Moderately	Yes	No	No	No	No	No	No	No	No	No	Other	Used code of silence (did not report)	Fear of retaliation	Other	187	15
1	Principal Investigator	Female	White	56-65	Occasionally	Moderately	Can't remember	Occasionally	Occasionally	Seldom	Seldom	Seldom	Can't remember	Moderately	Can't remember	Moderately	Moderately	Very often	Very often	No	Yes	No	Yes	No	No	Yes	No	No	Yes	Postdoc	Used code of silence (did not report)	Fear of retaliation		187	33
1	Principal Investigator	Female	White	46-55	Occasionally	Occasionally	Can't remember	Can't remember	Very often	Very often	Very often	Occasionally	Very often	Very often	Very often	Moderately	Very often	Very often	Very often	Yes	Yes	No	Yes	Yes	Yes	Yes	Yes	Yes	Yes	Other	Sought support from colleagues/friends/family	Fear of retaliation		187
1	Principal Investigator	Male	Middle Eastern	46-55	Moderately	Very often	Moderately	Moderately	Very often	Very often	Very often	Very often	Seldom	Seldom	Seldom	Very often	Very often	Very often	Very often			Yes	Yes	Yes	Yes	Yes	No	Yes	Yes	Graduate Student	Used code of silence (did not report)	Fear of retaliation	Unfair and biased	31
1	Principal Investigator	Male	White	36-45	Can't remember	Occasionally	Can't remember	Seldom	Moderately	Moderately	Moderately	Moderately	Moderately	Very often	Moderately	Very often	Moderately	Occasionally	Occasionally	Yes	No	No	No	Yes	Yes	Yes	No	No	No	Other	Reported to my institution/body responsible for your institution	Other	Unfair and biased	65
1	Lab Supervisor	Male	White	Over 66	Occasionally	Occasionally	Occasionally	Can't remember	Can't remember	Can't remember	Can't remember	Can't remember	Can't remember	Can't remember	Moderately	Seldom	Seldom	Occasionally	Can't remember	No	No	No	No	No	No	Yes	No	No	No	Visiting Scientist/Researcher	Sought support from colleagues/friends/family	Other		187	32
1	Department Chair	Male	Black or African American	56-65	Occasionally	Occasionally	Occasionally	Occasionally	Very often	Very often	Occasionally	Occasionally	Can't remember	Can't remember	Seldom	Occasionally	Occasionally	Moderately	Very often	Yes	No	No	No	Yes	No	No	No	No	No	Other	Other	Fear of retaliation		187	34
1	Principal Investigator	Female	White	56-65	Very often	Moderately	Very often	Occasionally	Seldom	Very often	Very often	Can't remember	Very often	Very often	Moderately	Seldom	Moderately	Moderately	Very often	Yes	No	Yes	Yes	Yes	No	Yes	No	Yes	Yes	Graduate Student	Sought support from colleagues/friends/family	Fear of retaliation		122
1	Department Chair	Female	White	46-55	Moderately	Moderately	Can't remember	Very often	Can't remember	Very often	Moderately	Occasionally	Occasionally	Moderately	Moderately	Very often	Occasionally	Can't remember	Moderately	Yes	No	No	Yes	Yes	No	No	No	No	No	Other	Other	Other	Unfair and biased	31
1	Principal Investigator	Male	White	Over 66	Seldom	Seldom	Can't remember	Seldom	Can't remember	Seldom	Seldom	Seldom	Seldom	Can't remember	Seldom	Can't remember	Can't remember	Can't remember	Can't remember	No	No	Yes	No	No	No	Yes	No	No	No	Graduate Student	Sought support from colleagues/friends/family	Fear of retaliation		187	14
1	Principal Investigator	Male	White	46-55	Very often	Very often	Very often	Very often	Very often	Very often	Very often	Very often	Occasionally	Very often	Very often	Very often	Very often	Very often	Very often	Yes	No	No	Yes	Yes	Yes	Yes	No	No	Yes	Postdoc	Reported to my institution/body responsible for your institution	Other	Unfair and biased	187	39
1	Department Chair
1	Group Leader	Male	White	56-65	Moderately	Occasionally	Seldom	Can't remember	Moderately	Moderately	Moderately	Moderately	Seldom	Can't remember	Seldom	Can't remember	Seldom	Occasionally	Occasionally	No	No	No	No	No	No	No	No	No	No	Other	Sought support from colleagues/friends/family	Fear of retaliation		187	36
1	Principal Investigator	Female	Middle Eastern	36-45	Very often	Very often	Moderately	Very often	Very often	Very often	Very often	Very often	Occasionally	Seldom	Moderately	Moderately	Very often	Very often	Very often	Yes	Yes	Yes	Yes	Yes	No	Yes	Yes	No	Yes	Graduate Student	Reported to my institution/body responsible for your institution		Fair and unbiased	187	5
1	Lab Supervisor	Male	White	25-35	Occasionally	Occasionally	Seldom	Seldom	Seldom	Occasionally	Occasionally	Moderately	Seldom	Can't remember	Very often	Seldom	Very often	Occasionally	Occasionally	No	No	Yes	No	No	Yes	No	No	Yes	No	Graduate Student	Sought support from colleagues/friends/family	Fear of being fired		187	26
1	Principal Investigator	Male	White	46-55	Occasionally	Seldom	Seldom	Occasionally	Moderately	Moderately	Occasionally	Moderately	Very often	Seldom	Moderately	Seldom	Moderately	Moderately	Very often	Yes	No	No	No	Yes	Yes	No	No	No	No	Postdoc	Reported to my institution/body responsible for your institution	Other	Unfair and biased	187	26
1
1	Principal Investigator	Male	White	36-45	Very often	Very often	Moderately	Very often	Very often	Very often	Very often	Very often	Very often	Very often	Very often	Very often	Very often	Very often	Very often	Yes	Yes	No	Yes	Yes	Yes	Yes	Yes	Yes	Yes	Graduate Student	Reported to my institution/body responsible for your institution		Unfair and biased	17
1	Principal Investigator	Male	White	36-45	Moderately	Seldom	Seldom	Very often	Seldom	Very often	Very often	Very often	Very often	Very often	Seldom	Can't remember	Moderately	Very often	Very often	No	No	Yes	Yes	Yes	No	No	No	No	No	Graduate Student	Used code of silence (did not report)	Fear of retaliation	Other	187	45
1	Department Chair
1	Principal Investigator	Male	White	36-45	Moderately	Very often	Very often	Very often	Occasionally	Very often	Very often	Can't remember	Very often	Very often	Very often	Moderately	Very often	Very often	Very often	Yes	No	No	Yes	Yes	Yes	Yes	Yes	Yes	Yes	Graduate Student	Sought support from colleagues/friends/family	Fear of being fired	Unfair and biased	163
1	Principal Investigator	Male	White	46-55	Moderately	Occasionally	Occasionally	Occasionally	Very often	Occasionally	Moderately	Seldom	Can't remember	Can't remember	Can't remember	Seldom	Occasionally	Seldom	Seldom	No	No	Yes	Yes	No	No	No	No	No	No	Graduate Student	Sought support from colleagues/friends/family	Fear of retaliation		187	7
1	Principal Investigator	Male	White	56-65	Occasionally	Occasionally	Occasionally	Occasionally	Very often	Very often	Moderately	Very often	Occasionally	Seldom	Moderately	Moderately	Very often	Very often	Very often	Yes	No	No	No	Yes	No	Yes	No	No	No	Graduate Student	Sought support from colleagues/friends/family	Fear of retaliation	Unfair and biased	187	20
1	Group Leader
1	Department Chair	Female	White	25-35	Seldom	Can't remember	Moderately	Occasionally	Moderately	Very often	Occasionally	Can't remember	Very often	Can't remember	Seldom	Can't remember	Occasionally	Can't remember	Moderately	No	No	No	No	Yes	No	No	No	No	No	Other	Used code of silence (did not report)	Fear of retaliation
1	Department Chair
1	Department Chair
1	Lab Supervisor
1	Department Chair
1	Group Leader	Male	White	36-45	Very often	Seldom	Can't remember	Occasionally	Moderately	Occasionally	Can't remember	Moderately	Moderately	Very often	Very often	Moderately	Very often	Can't remember	Moderately	Yes	No	No	Yes	Yes	No	No	No	No	No	Other	Reported to my institution/body responsible for your institution		Unfair and biased
1
1
1
1	Principal Investigator
1	Department Chair
1	Principal Investigator
1	Department Chair	Female	Middle Eastern	56-65	Can't remember	Seldom	Can't remember	Can't remember	Can't remember	Very often	Very often	Very often	Can't remember	Very often	Can't remember	Can't remember	Can't remember	Can't remember	Can't remember	No	No	No	No	Yes	No	No	No	No	No	Other	Reported to my institution/body responsible for your institution		Other
1	Principal Investigator
1	Department Chair	Female	White	56-65	Moderately	Moderately	Very often	Moderately	Very often	Very often	Occasionally	Very often	Very often	Can't remember	Seldom	Moderately	Can't remember	Very often	Very often	No	No	No	No	Yes	No	No	No	No	No	Other	Reported to my institution/body responsible for your institution		Other
1	Department Chair	Female	Asian	25-35	Moderately	Occasionally	Can't remember	Occasionally	Occasionally	Very often	Very often	Can't remember	Very often	Occasionally	Occasionally	Can't remember	Seldom	Occasionally	Occasionally	Yes	No	No	No	Yes	No	No	No	No	No	Other	Sought support from colleagues/friends/family	Other	Other
1	Principal Investigator	Female	White	36-45	Very often	Very often	Moderately	Moderately	Very often	Very often	Very often	Moderately	Moderately	Seldom	Moderately	Very often	Moderately	Occasionally	Occasionally	Yes	No	No	No	Yes	No	No	No	No	No	Graduate Student	Other	Fear of being fired	Unfair and biased	187	10
1	Department Chair
1	Principal Investigator
1	Principal Investigator	Male	White	36-45	Moderately	Seldom	Seldom	Occasionally	Seldom	Very often	Occasionally	Can't remember		Can't remember	Can't remember	Very often	Very often	Very often	Very often	Yes	No	No	No	Yes	Yes	No	No	Yes	No	Graduate Student	Used code of silence (did not report)	Fear of retaliation	Other
1	Principal Investigator
1	Department Chair
1	Department Chair
1	Department Chair	Male	White	36-45	Occasionally	Can't remember	Seldom	Seldom	Seldom	Very often	Moderately	Very often	Can't remember	Can't remember	Moderately	Can't remember	Very often	Very often	Very often	Yes	No	No	No	No	No	Yes	No	Yes	Yes	Other	Sought support from colleagues/friends/family	Other	Unfair and biased
1	Department Chair	Female	White	36-45	Occasionally	Occasionally	Moderately	Moderately	Moderately	Moderately	Occasionally	Occasionally	Very often	Can't remember	Moderately	Seldom	Moderately	Moderately	Very often	Yes	No	No	No			No	No	Yes		Other	Used code of silence (did not report)	Fear of retaliation
1	Department Chair
1	Group Leader	Male	White	36-45	Very often	Very often	Very often	Very often	Very often	Very often	Very often	Very often	Very often	Very often	Very often	Very often	Very often	Occasionally	Very often	Yes	No	Yes	No	Yes	Yes	Yes	Yes	Yes	Yes	Graduate Student	Reported to my institution/body responsible for your institution		Unfair and biased	168
1	Lab Supervisor
1	Department Chair	Male	White	56-65	Seldom	Can't remember	Occasionally	Moderately	Occasionally	Moderately	Moderately	Very often	Can't remember	Can't remember	Can't remember	Can't remember	Occasionally	Very often	Moderately	Yes	No	No	Yes	No	No	No		No	Yes		Other	Fear of retaliation
1	Department Chair
1	Department Chair
1	Principal Investigator
1	Department Chair	Female	White	56-65	Moderately	Seldom	Can't remember	Can't remember	Occasionally	Can't remember	Can't remember	Moderately	Seldom	Can't remember	Moderately	Can't remember	Seldom	Very often	Occasionally	No	No	No	No	No	No	No	No	No	No	Graduate Student	Reported to my institution/body responsible for your institution		Fair and unbiased	187	10
1	Lab Supervisor	Male	White	46-55	Very often	Moderately	Occasionally	Occasionally	Very often	Moderately	Very often	Moderately	Very often	Can't remember	Occasionally	Can't remember	Moderately	Very often	Very often	No	No	Yes	Yes	No	No	Yes	No	No	Yes	Graduate Student	Used code of silence (did not report)	Fear of retaliation		187	17
1	Principal Investigator
1	Principal Investigator	Female	White	56-65	Occasionally	Very often	Seldom	Occasionally	Can't remember	Moderately	Moderately	Moderately	Can't remember	Can't remember	Can't remember	Can't remember	Seldom	Seldom	Seldom	Yes	No	Yes	No	No	No	No	No	No	No	Graduate Student	Sought support from colleagues/friends/family	Other	Unfair and biased
1	Department Chair	Male	White	Over 66	Very often	Very often	Occasionally	Very often	Moderately	Moderately	Very often	Very often	Very often	Very often	Very often	Very often	Very often	Very often	Very often	Yes	No	No	No	Yes	No	No	No	No	Yes	Other	Other	Other	Unfair and biased	31	53
1	Lab Supervisor	Male	Asian	46-55	Seldom	Seldom	Seldom	Can't remember	Very often	Occasionally	Seldom	Very often	Very often	Seldom	Very often	Very often	Very often	Very often	Very often	Yes	No	Yes	No	Yes	No	No	No	No	No	Visiting Scientist/Researcher	Sought support from colleagues/friends/family	Fear of retaliation	Unfair and biased	78
1	Department Chair	Male	White	56-65	Very often	Very often	Very often	Very often	Very often	Very often	Very often	Very often	Very often	Very often	Very often	Very often	Very often	Very often	Very often	Yes	Yes	Yes	Yes	Yes	No	No	Yes	No	Yes	Other	Reported to my institution/body responsible for your institution		Unfair and biased	122
1	Principal Investigator	Female	White	46-55	Moderately	Occasionally	Occasionally	Very often	Very often	Very often	Very often	Very often	Can't remember	Can't remember	Very often	Can't remember	Very often	Very often	Very often	No	No	Yes	No		Yes	Yes	No	No	No	Postdoc	Sought support from colleagues/friends/family	Visa issues		187	33
1	Principal Investigator	Female	White	36-45	Can't remember	Very often	Very often	Very often	Occasionally	Moderately	Can't remember	Can't remember	Occasionally	Moderately	Occasionally	Can't remember	Can't remember	Very often	Occasionally	Yes	No	No	No	Yes	No	No	No	No	Yes	Graduate Student	Reported to my institution/body responsible for your institution	Other	Unfair and biased	187	33
1
1	Group Leader
1	Principal Investigator	Male	Asian	46-55	Seldom	Can't remember	Can't remember	Seldom	Can't remember	Occasionally	Can't remember	Occasionally	Seldom	Can't remember	Moderately	Seldom	Moderately	Moderately	Moderately	No	No	Yes	Yes	No	No	Yes	No	No	Yes	Graduate Student	Used code of silence (did not report)	Fear of retaliation		187	42
1	Group Leader
1	Principal Investigator
1	Principal Investigator	Female	White	36-45	Occasionally						Occasionally				Moderately		Moderately													Postdoc	Sought support from colleagues/friends/family			187	17
1	Principal Investigator	Male	Asian	36-45	Very often		Can't remember	Very often	Can't remember	Very often	Very often	Occasionally		Can't remember	Seldom	Moderately	Moderately	Very often	Very often	No	No	Yes	No	No	No	No	No	No	No	Postdoc	Sought support from colleagues/friends/family	Fear of retaliation
1	Department Chair	Male	White	46-55	Occasionally	Occasionally	Moderately	Occasionally	Can't remember	Occasionally	Seldom	Can't remember	Seldom	Can't remember	Occasionally	Moderately	Can't remember	Can't remember	Can't remember	No	No	No	No	No	No	No	No	No	No	Graduate Student	Sought support from colleagues/friends/family	Fear of retaliation	Unfair and biased	24
1	Department Chair	Other genders	Asian	46-55	Very often	Very often	Very often	Very often	Very often	Very often	Very often	Very often	Can't remember	Seldom	Very often	Very often	Very often	Can't remember	Can't remember	Yes	Yes	No	Yes	Yes	No	No	No	No	Yes	Graduate Student	Reported to my institution/body responsible for your institution		Unfair and biased	185
1	Group Leader
1	Department Chair	Female	White	36-45
1	Group Leader	Male	White	56-65	Moderately	Moderately	Moderately	Moderately	Moderately	Moderately	Moderately	Moderately	Seldom	Seldom	Moderately	Seldom	Moderately	Moderately	Occasionally	Yes	No	Yes	Yes	Yes	Yes	Yes	No	Yes	Yes	Postdoc	Used code of silence (did not report)	Fear of retaliation	Unfair and biased
1	Principal Investigator
1	Principal Investigator	Male	White	Over 66	Very often	Can't remember	Can't remember	Can't remember	Can't remember	Very often	Very often	Can't remember	Very often		Very often	Very often	Very often	Very often	Very often	Yes	No	Yes	No	Yes	No	No	Yes	No	Yes	Postdoc	Reported to my institution/body responsible for your institution		Unfair and biased	187	22
1	Department Chair
1	Group Leader	Female	White	46-55	Moderately	Moderately	Can't remember	Can't remember	Occasionally	Occasionally	Moderately	Very often	Can't remember	Seldom	Moderately	Moderately	Very often	Very often	Very often	No	No	Yes	Yes	No	No	No	No	No	No	Graduate Student	Sought support from colleagues/friends/family	Other	Other	169
1	Lab Supervisor	Female	White	36-45	Occasionally	Can't remember	Occasionally		Moderately	Very often	Seldom	Occasionally	Can't remember	Can't remember	Very often	Moderately	Very often	Very often	Moderately	Yes	No	No	Yes	Yes	Yes	Yes	No	Yes	No	Graduate Student	Sought support from colleagues/friends/family	Fear of retaliation	Other	9
1	Principal Investigator
1	Department Chair
1	Principal Investigator	Male	White	36-45	Seldom	Very often	Very often	Very often	Very often	Very often	Occasionally	Very often	Very often	Can't remember	Can't remember	Can't remember	Can't remember	Seldom	Can't remember	No	No	Yes	No	No	No	Yes	No	No	Yes	Graduate Student	Sought support from colleagues/friends/family	Fear of retaliation	Unfair and biased	9	53
1	Principal Investigator	Male	White	36-45	Seldom	Occasionally	Seldom	Seldom	Can't remember	Occasionally	Occasionally	Occasionally	Moderately	Seldom	Very often	Can't remember	Moderately	Moderately	Very often	No	No	No	No	Yes	No	No	No	Yes	No	Other	Sought support from colleagues/friends/family	Fear of retaliation
1	Group Leader	Male	White	46-55	Very often	Can't remember	Very often	Very often	Very often	Can't remember	Very often	Can't remember	Can't remember	Can't remember	Can't remember	Can't remember	Can't remember	Can't remember	Can't remember	No	No	No	No	No	No	No	No	No	No	Graduate Student	Used code of silence (did not report)	Other	Other	185
1	Group Leader
1
1	Principal Investigator	Male	Middle Eastern	46-55
1	Department Chair
1	Department Chair
1	Department Chair	Male	Asian	25-35	Very often	Very often	Very often	Seldom	Very often	Very often	Very often	Very often	Seldom	Can't remember	Can't remember	Very often	Moderately	Can't remember	Can't remember	Yes	No	No	No	Yes	No	No	No	No	No	Visiting Scientist/Researcher	Sought support from colleagues/friends/family	Other	Other
1	Lab Supervisor	Female	White	36-45	Moderately	Moderately	Occasionally	Very often	Occasionally	Moderately	Seldom	Seldom	Very often	Can't remember	Very often	Very often	Seldom	Very often	Very often	Yes	No	Yes	Yes	Yes	Yes	Yes	Yes	No	Yes	Postdoc	Reported to my institution/body responsible for your institution	Other	Fair and unbiased	35
1	Principal Investigator	Male	White	46-55	Seldom	Moderately	Seldom	Occasionally	Moderately	Occasionally	Occasionally	Seldom	Can't remember	Can't remember	Moderately	Occasionally	Very often	Moderately	Moderately	No	No	Yes	No	No	No	No	No	No	No	Graduate Student	Used code of silence (did not report)	Visa issues	Unfair and biased	187	33
1	Principal Investigator	Female	Asian	56-65	Occasionally	Seldom	Moderately	Moderately	Very often	Can't remember	Seldom	Can't remember	Seldom	Can't remember	Occasionally	Can't remember	Seldom	Moderately	Occasionally	Yes	Yes	No	No	No	Yes	No	No	Yes	No	Graduate Student	Sought support from colleagues/friends/family	Fear of retaliation	Unfair and biased
1	Principal Investigator	Female	East Indian	25-35	Seldom	Can't remember	Seldom	Can't remember	Moderately	Moderately	Moderately	Can't remember	Occasionally	Very often	Occasionally	Seldom	Can't remember	Can't remember	Moderately	No	No	No	No	No	No	Yes	No	No	Yes	Postdoc	Sought support from colleagues/friends/family	Fear of retaliation	Other	187	22
1	Department Chair
1	Principal Investigator	Female	White	56-65	Seldom	Occasionally	Seldom	Occasionally	Moderately	Occasionally	Moderately	Occasionally	Moderately	Moderately	Moderately	Occasionally	Very often	Moderately	Seldom	No	No	No	No	Yes	No	Yes	No	No	Yes	Other	Sought support from colleagues/friends/family	Fear of retaliation	Other	9
1	Principal Investigator	Male	White	56-65	Very often	Very often	Very often	Occasionally	Very often	Very often	Very often	Very often	Very often	Very often	Very often	Seldom	Very often	Very often	Very often	Yes	No	Yes	Yes	Yes	Yes	Yes	No	No	Yes	Other	Used code of silence (did not report)	Fear of retaliation		187	33
1	Principal Investigator	Male	White	36-45	Can't remember	Occasionally	Seldom	Can't remember	Seldom	Occasionally	Occasionally	Occasionally	Occasionally	Moderately	Seldom	Can't remember	Occasionally	Can't remember	Can't remember	No	No	No	No	Yes	Yes		No	No	No	Postdoc	Sought support from colleagues/friends/family	Fear of retaliation		89
1	Department Chair
1	Principal Investigator	Female	White	36-45	Occasionally	Occasionally	Can't remember	Seldom	Very often	Moderately	Very often	Occasionally	Seldom	Moderately	Very often	Moderately	Moderately	Very often	Very often	No	No	No	Yes	No	No	Yes	No	No	Yes	Graduate Student	Reported to my institution/body responsible for your institution		Other	101
1	Group Leader	Male	White	56-65	Seldom	Moderately	Moderately	Moderately	Can't remember	Occasionally	Moderately	Moderately	Very often	Seldom	Occasionally	Seldom	Very often	Very often	Very often	No	No	No	No	No	No	No	No	No	No	Visiting Scientist/Researcher	Sought support from colleagues/friends/family	Fear of retaliation	Unfair and biased	156
1	Lab Supervisor
1	Department Chair
1	Principal Investigator	Female	White	Over 66	Seldom	Seldom	Occasionally	Occasionally	Seldom	Moderately	Seldom	Seldom	Occasionally	Very often	Very often	Moderately	Occasionally	Very often	Moderately	No	No	No	Yes	Yes	No	No	No	No	Yes	Postdoc	Sought support from colleagues/friends/family	Other	Other	187	44
1
1	Principal Investigator	Male	Asian	46-55	Occasionally	Moderately	Moderately	Moderately	Very often	Moderately	Very often	Occasionally	Moderately	Seldom	Very often	Very often	Very often	Moderately	Moderately	Yes	No	Yes	Yes	Yes	No	No	No	No	No	Graduate Student	Sought support from colleagues/friends/family	Fear of being fired	Unfair and biased	162
1	Group Leader	Male	Asian	56-65	Moderately	Moderately	Moderately	Very often	Very often	Very often	Very often	Very often	Very often	Occasionally	Very often	Occasionally	Very often	Very often	Very often	Yes	No	No	No	Yes	No	No	No	No	Yes	Other	Sought support from colleagues/friends/family	Fear of being fired	Unfair and biased	104
1	Group Leader	Female	Hispanic	25-35	Occasionally	Moderately	Can't remember	Moderately	Moderately	Very often	Moderately	Can't remember	Occasionally	Can't remember	Can't remember	Can't remember	Moderately	Can't remember	Can't remember	No	No	No	No	Yes	No	No	No	No	No	Graduate Student	Used code of silence (did not report)	Other		187	23
1	Principal Investigator	Male	White	Over 66	Seldom	Seldom	Seldom	Seldom	Seldom	Very often	Seldom	Very often	Very often	Very often	Very often	Seldom	Very often	Very often	Very often	No	No	No	Yes	Yes	No	No	No	Yes	No	Other	Used code of silence (did not report)	Fear of being fired		187	21
1	Principal Investigator	Female	Hispanic	46-55	Very often	Can't remember	Can't remember	Very often	Very often	Very often	Very often	Very often	Very often	Very often	Very often	Very often	Very often	Very often	Very often	Yes	No	No	No	Yes	No	No	No	No	Yes	Graduate Student	Reported to my institution/body responsible for your institution	Other	Other	9	53
1	Principal Investigator
1	Principal Investigator	Female	White	56-65	Can't remember	Seldom	Can't remember	Can't remember	Occasionally	Occasionally	Seldom	Occasionally	Can't remember	Can't remember	Can't remember	Can't remember	Can't remember	Moderately	Occasionally	No	No	No	No	No	No	No	No	No	No	Postdoc	Used code of silence (did not report)	Fear of retaliation		187	45
1	Principal Investigator	Male	White	46-55	Occasionally	Very often	Moderately	Very often	Moderately	Moderately	Very often	Moderately	Occasionally	Seldom	Occasionally	Occasionally	Occasionally	Occasionally	Occasionally	Yes	No	No	No	Yes	No	Yes	No	No	No	Postdoc	Sought support from colleagues/friends/family	Fear of retaliation	Other	10
1	Principal Investigator	Male	White	25-35	Very often	Moderately	Moderately	Very often	Moderately	Very often	Moderately	Moderately	Occasionally	Very often	Very often	Occasionally	Moderately	Moderately	Very often	Yes	No	No	No	Yes	Yes	No	No	No	Yes	Graduate Student	Reported to my institution/body responsible for your institution		Fair and unbiased	185
1	Lab Supervisor	Male	White	56-65	Moderately	Occasionally	Seldom	Moderately	Moderately	Moderately	Moderately	Moderately	Can't remember	Very often	Moderately	Can't remember	Moderately	Can't remember	Moderately	No	No	No	No	No	No	No	No	No	No	Postdoc	Used code of silence (did not report)	Fear of retaliation
1	Department Chair
1	Principal Investigator	Male	White	36-45	Very often	Moderately	Seldom	Very often	Very often	Very often	Very often	Very often	Seldom	Seldom	Very often	Seldom	Very often	Moderately	Moderately		Yes	No	Yes	Yes	Yes	Yes	No	Yes	Yes	Visiting Scientist/Researcher	Reported to my institution/body responsible for your institution	Other	Unfair and biased	187	33
1	Department Chair	Male	White	Over 66	Very often	Very often	Very often	Very often	Very often	Very often	Very often	Very often	Very often	Very often	Very often	Very often	Very often	Very often	Very often	Yes	No	No	No	Yes	Yes	Yes	No	Yes	No	Other	Reported to my institution/body responsible for your institution	Other	Fair and unbiased	187	31
1	Department Chair	Male	White	56-65	Can't remember	Can't remember	Can't remember	Can't remember	Very often	Very often	Very often	Very often	Very often	Can't remember	Can't remember	Very often	Very often	Can't remember	Very often	No	No	Yes	Yes	Yes	No	No	No	No	Yes	Graduate Student	Sought support from colleagues/friends/family	Other		179
1	Group Leader	Male	White	56-65	Can't remember	Can't remember	Can't remember	Seldom	Can't remember	Seldom	Can't remember	Occasionally	Can't remember	Seldom	Very often	Can't remember	Very often	Very often	Moderately	No	No	No	No	Yes	Yes	Yes	No	Yes	No	Visiting Scientist/Researcher	Other	Fear of retaliation	Unfair and biased	187	10
1	Group Leader	Female	White	36-45	Very often	Can't remember	Occasionally	Seldom	Occasionally	Moderately	Occasionally	Can't remember	Seldom	Can't remember	Can't remember	Can't remember	Occasionally	Can't remember	Seldom	No	No	No	No	No	No	No	No	No	No	Graduate Student	Other	Other		10
1	Department Chair
1	Group Leader
1	Principal Investigator	Prefer not to specify	White	Over 66	Moderately	Moderately	Moderately	Occasionally	Very often	Can't remember	Occasionally	Can't remember	Moderately	Can't remember	Can't remember	Can't remember	Very often	Occasionally	Occasionally	No	No	No	Yes	No	No	No	No	No	No	Graduate Student	Used code of silence (did not report)	Fear of retaliation		187
1	Principal Investigator	Male	White	46-55	Seldom	Occasionally	Can't remember	Moderately	Occasionally	Occasionally	Occasionally	Can't remember	Can't remember	Can't remember	Moderately	Moderately	Moderately	Very often	Occasionally	No	No	Yes	Yes	No	Yes	Yes	No	No	No	Graduate Student	Used code of silence (did not report)	Fear of retaliation	Other	187	31
1	Principal Investigator	Male	White	36-45	Seldom	Seldom	Seldom	Seldom	Seldom	Very often	Very often	Very often	Very often	Very often	Very often	Very often	Very often	Very often	Very often	No	No	No	Yes	Yes	No	No	No	No	No	Postdoc	Used code of silence (did not report)	Fear of retaliation	Unfair and biased	187	24
1	Department Chair	Male	White	56-65	Occasionally	Moderately	Very often	Occasionally	Very often	Very often	Very often	Very often	Very often	Can't remember	Moderately	Seldom	Occasionally	Occasionally	Moderately	No	No	Yes	No	No	Yes	Yes	No	Yes	No	Postdoc	Reported to my institution/body responsible for your institution	Other	Other	187	45
1	Principal Investigator	Female	Asian	46-55	Very often	Very often	Very often	Very often	Very often	Very often	Very often	Very often	Very often	Very often	Very often	Very often	Very often	Very often	Very often	Yes	No	No	Yes	Yes	Yes	Yes	Yes	Yes	Yes	Other	Reported to my institution/body responsible for your institution	Fear of retaliation	Unfair and biased	187	6
1	Principal Investigator	Male	White	46-55	Very often	Seldom	Seldom	Seldom	Very often	Very often	Very often	Very often	Moderately	Seldom	Very often	Seldom	Very often	Seldom	Very often	No	No	No	No	Yes	Yes	Yes	No	No	No	Postdoc	Other	Other	Other	187	24
1	Group Leader	Female	Asian	25-35	Very often	Occasionally	Very often	Very often	Very often	Very often	Very often	Can't remember	Very often	Can't remember	Can't remember	Can't remember	Can't remember	Very often	Very often	No	No	No	No	No	No	No	No	No	No	Graduate Student	Reported to my institution/body responsible for your institution	Fear of retaliation	Unfair and biased	187	5
1	Group Leader	Male	White	56-65	Seldom	Seldom	Occasionally	Seldom	Occasionally	Moderately	Seldom	Can't remember	Occasionally	Can't remember	Very often	Can't remember	Moderately	Can't remember	Occasionally	Yes	Yes	No	No	Yes	No	No	Yes	No	Yes	Other	Used code of silence (did not report)	Other		138
1	Principal Investigator	Male	White	46-55	Moderately	Moderately	Moderately	Can't remember	Occasionally	Very often	Very often	Very often	Very often	Can't remember	Moderately	Can't remember	Moderately	Very often	Very often	Yes	No	Yes	Yes	Yes	Yes	Yes	Yes	No	Yes	Visiting Scientist/Researcher	Used code of silence (did not report)	Fear of retaliation		187	10
1	Group Leader	Male	White	25-35	Occasionally	Can't remember	Occasionally	Can't remember	Can't remember	Can't remember	Can't remember	Occasionally	Can't remember	Can't remember	Can't remember	Can't remember	Can't remember	Can't remember	Can't remember	No	No	No	No	No	No	No	No	No	No	Graduate Student	Used code of silence (did not report)	Other		187	5
1	Principal Investigator	Male	White	36-45	Occasionally	Can't remember	Can't remember	Can't remember	Seldom	Occasionally	Occasionally	Can't remember	Can't remember	Can't remember	Can't remember	Can't remember	Can't remember	Can't remember	Can't remember	No	No	No	No	No	No	No	No	No	No	Undergraduate Student	Other	Other		187	39
1	Principal Investigator	Male	White	36-45	Can't remember	Can't remember	Can't remember	Can't remember	Can't remember	Seldom	Can't remember	Occasionally	Very often	Occasionally	Very often	Occasionally	Very often	Moderately	Moderately	Yes	No	Yes	No	No	Yes	Yes	No	Yes	Yes	Graduate Student	Other	Fear of retaliation	Unfair and biased	84
1	Principal Investigator	Male	White	56-65	Occasionally	Occasionally	Seldom	Moderately	Moderately	Can't remember	Can't remember	Can't remember	Moderately	Can't remember	Moderately	Can't remember	Occasionally	Very often	Moderately	Yes	No	No	No	No	No	No	No	No	Yes	Visiting Scientist/Researcher	Reported to my institution/body responsible for your institution	Other	Fair and unbiased	169
1	Principal Investigator	Male	White	46-55	Very often	Moderately	Moderately	Moderately	Very often	Moderately	Very often	Can't remember	Seldom	Seldom	Very often	Very often	Very often	Can't remember	Moderately	No	No	No	Yes	No	No	No	No	Yes	Yes	Other	Sought support from colleagues/friends/family	Fear of retaliation	Unfair and biased	187	44
1	Group Leader	Male	East Indian	25-35	Can't remember	Can't remember	Can't remember	Seldom	Can't remember	Occasionally	Can't remember	Can't remember	Can't remember	Seldom	Very often	Seldom	Very often	Can't remember	Can't remember	No	No	No	No	No	No	Yes	No	No	No	Undergraduate Student	Sought support from colleagues/friends/family			187	39
1	Department Chair	Male	White	56-65	Very often	Very often	Very often	Very often	Occasionally	Very often	Occasionally	Seldom	Seldom	Can't remember	Moderately	Can't remember	Occasionally	Can't remember	Can't remember	Yes	No	No	No	No	No	No	No	No	No	Other	Reported to my institution/body responsible for your institution	Other	Unfair and biased	187	45
1	Principal Investigator	Female	White	36-45	Moderately	Seldom	Occasionally	Occasionally	Very often	Very often	Moderately	Occasionally	Can't remember	Can't remember	Occasionally	Occasionally	Seldom	Occasionally	Seldom	Yes	No	No	No	Yes	Yes	No	No	No	No	Postdoc	Used code of silence (did not report)	Fear of retaliation		187	46
1	Principal Investigator	Male	White	36-45	Very often	Moderately	Occasionally	Occasionally	Very often	Very often	Moderately	Very often	Very often	Moderately	Very often	Very often	Very often	Very often	Very often	No	No	No	No	Yes	Yes	Yes	No	Yes	No	Graduate Student	Used code of silence (did not report)	Fear of retaliation	Unfair and biased	187	11
1	Principal Investigator	Male	White	Over 66	Occasionally	Seldom	Seldom	Can't remember	Occasionally	Can't remember	Occasionally	Can't remember	Can't remember	Can't remember	Can't remember	Can't remember	Seldom	Can't remember	Occasionally	No	No	No	No	No	No	No	No	No	No	Postdoc	Sought support from colleagues/friends/family	Other		187	7
1	Group Leader	Male	White	56-65	Very often	Very often	Moderately	Occasionally	Moderately	Very often	Very often	Very often	Moderately	Moderately	Moderately	Very often	Very often	Moderately	Very often	Yes	No	No	No	Yes	No	No	Yes	No	Yes	Other	Other	Fear of retaliation	Unfair and biased	187	22
1	Principal Investigator	Male	White	36-45	Very often	Very often	Very often	Very often	Very often	Very often	Very often	Very often	Occasionally	Seldom	Very often	Very often	Very often	Very often	Very often	Yes	No	No	Yes	Yes	No	Yes	No	No	Yes	Graduate Student	Sought support from colleagues/friends/family	Fear of retaliation	Unfair and biased	187	45
1	Principal Investigator	Male	White	46-55	Seldom	Seldom	Moderately	Seldom	Moderately	Moderately	Very often	Moderately	Occasionally	Seldom	Moderately	Can't remember	Moderately	Occasionally	Moderately			Yes	No	Yes	No	No	No	No	No	Graduate Student	Used code of silence (did not report)	Other		187	29
1	Principal Investigator	Male	Hispanic	46-55	Can't remember	Moderately	Seldom	Seldom	Seldom	Very often	Occasionally	Very often	Can't remember	Can't remember	Very often	Very often	Very often	Very often	Can't remember	No	No	Yes	Yes	No	Yes	Yes	No	Yes	No	Graduate Student	Used code of silence (did not report)	Fear of retaliation	Other	37	53
1	Department Chair	Male	White	46-55	Moderately	Occasionally	Moderately	Seldom	Seldom	Occasionally	Very often	Seldom	Can't remember	Can't remember	Can't remember	Can't remember	Seldom	Can't remember	Can't remember	Yes	No	No	No	No	No	No	No	No	No	Graduate Student	Sought support from colleagues/friends/family	Fear of retaliation	Unfair and biased	187	23
1	Lab Supervisor	Female	White	25-35	Seldom	Can't remember	Seldom	Can't remember	Seldom	Occasionally	Occasionally	Seldom	Occasionally	Occasionally	Moderately	Very often	Very often	Occasionally	Occasionally	No	No	No	No	Yes	Yes	Yes	No	Yes	Yes	Postdoc	Used code of silence (did not report)	Visa issues	Unfair and biased	187	45
1	Principal Investigator	Female	White	46-55	Occasionally	Very often	Moderately	Occasionally	Very often	Occasionally	Occasionally	Occasionally	Seldom	Can't remember	Can't remember	Can't remember	Occasionally	Can't remember	Can't remember	Yes	No	No	No	No	No	No	No	No	Yes	Graduate Student	Sought support from colleagues/friends/family	Fear of retaliation		187	39
1	Department Chair	Male	White	46-55	Can't remember	Moderately	Can't remember	Occasionally	Can't remember	Moderately	Moderately	Moderately	Very often	Moderately	Very often	Can't remember	Very often	Very often	Very often	Yes	No	Yes	No	Yes	Yes	Yes	Yes	No	No	Postdoc	Reported to my institution/body responsible for your institution		Fair and unbiased	10
1	Department Chair	Male	White	56-65	Very often	Occasionally	Occasionally	Occasionally	Very often	Very often	Moderately	Very often	Can't remember	Occasionally	Moderately	Moderately	Very often	Very often	Very often	Yes	Yes	No	Yes	Yes	No	No	No	No	Yes	Other	Reported to my institution/body responsible for your institution		Unfair and biased	9
1
1	Principal Investigator
1	Principal Investigator	Female	White	36-45	Moderately	Occasionally	Very often	Seldom	Occasionally	Moderately	Very often	Very often	Very often	Very often	Very often	Moderately	Very often	Very often	Moderately	Yes	No	No	Yes	Yes	No	Yes	No	Yes	No	Postdoc	Sought support from colleagues/friends/family	Fear of retaliation	Unfair and biased	89
1	Department Chair
1	Group Leader	Male	Asian	36-45	Can't remember	Occasionally	Can't remember	Can't remember	Can't remember	Occasionally	Occasionally	Can't remember	Can't remember	Can't remember	Can't remember	Can't remember	Can't remember	Can't remember	Can't remember	No	No	No	No	Yes	No	No	No	No	No	Graduate Student	Sought support from colleagues/friends/family	Fear of retaliation		187	16
1	Principal Investigator
1	Principal Investigator
1	Principal Investigator	Prefer not to specify	White																												Sought support from colleagues/friends/family	Fear of retaliation
1	Principal Investigator
1	Principal Investigator
1	Department Chair	Female	White	46-55	Can't remember	Moderately	Moderately	Can't remember	Occasionally	Occasionally	Can't remember	Occasionally	Occasionally	Seldom	Can't remember	Very often	Moderately	Moderately	Seldom	No	No	No	No	No	No	No	No	No	No	Other	Sought support from colleagues/friends/family	Fear of retaliation	Other	31
1	Group Leader	Female	White	46-55	Very often	Very often	Very often	Very often		Very often		Can't remember		Very often	Very often	Moderately	Very often	Very often	Very often	Yes	No	No	Yes	Yes	Yes	Yes	Yes	Yes	Yes	Other	Sought support from colleagues/friends/family	Fear of retaliation	Unfair and biased
1	Principal Investigator	Male	Asian	46-55	Can't remember	Can't remember	Occasionally	Seldom	Can't remember	Can't remember	Can't remember	Can't remember	Can't remember	Can't remember	Seldom	Can't remember	Can't remember	Can't remember	Can't remember	No	No	No	No	No	No	No	No	No	No	Postdoc	Used code of silence (did not report)	Fear of retaliation	Unfair and biased
1	Principal Investigator	Male	Middle Eastern	46-55	Very often	Very often	Very often	Very often	Very often	Very often	Very often	Very often	Very often	Very often	Very often	Very often	Very often	Very often	Very often	Yes	No	No	No	Yes	Yes	Yes	No	Yes	Yes	Graduate Student	Reported to my institution/body responsible for your institution	Fear of retaliation	Unfair and biased	187	45
1	Group Leader
1	Department Chair	Female	White	Over 66	Occasionally	Moderately	Can't remember	Can't remember	Occasionally	Occasionally	Occasionally	Can't remember	Very often	Can't remember	Can't remember	Can't remember	Can't remember	Can't remember	Very often	No	No	No	No	Yes	No	No	No	No	No	Other	Sought support from colleagues/friends/family	Other
1	Lab Supervisor
1	Principal Investigator
1	Principal Investigator
1	Group Leader
1	Department Chair	Male	White	46-55																Yes				Yes					Yes	Graduate Student	Used code of silence (did not report)	Fear of retaliation
1	Department Chair
1	Group Leader
1
1	Principal Investigator
1	Principal Investigator	Male	White	Over 66	Moderately	Can't remember	Can't remember	Can't remember	Can't remember	Can't remember	Moderately	Can't remember	Can't remember	Can't remember	Can't remember	Can't remember	Seldom	Can't remember	Can't remember	No	No	No	No	No	No	Yes	No	No	No	Postdoc	Other	Other
1	Department Chair
1	Department Chair	Male	White	56-65	Very often	Very often	Very often	Very often	Very often	Very often	Very often	Very often	Occasionally	Seldom	Moderately	Very often	Very often	Very often	Very often											Undergraduate Student	Sought support from colleagues/friends/family		Unfair and biased
1	Department Chair
1	Department Chair
1	Principal Investigator
1	Group Leader
1	Principal Investigator
1	Department Chair	Female	White	56-65	Moderately	Moderately	Moderately	Moderately	Moderately	Moderately	Very often	Moderately	Very often	Very often	Very often	Very often	Moderately	Very often	Very often	No	No	No	No	Yes	No	Yes	Yes	Yes	No	Other	Reported to my institution/body responsible for your institution		Other	31
1	Lab Supervisor
1	Principal Investigator
1	Group Leader	Female	White0	46-55	Moderately	Moderately	Seldom	Can't remember	Very often	Very often	Very often	Moderately	Moderately	Seldom	Occasionally	Moderately	Very often	Occasionally	Occasionally	Yes	No	No	Yes	Yes	No	No	No	No	Yes	Other	Used code of silence (did not report)	Fear of retaliation		102
1	Principal Investigator	Female	Middle Eastern	36-45	Can't remember	Can't remember	Seldom	Seldom	Can't remember	Seldom	Seldom	Occasionally	Seldom	Moderately	Moderately	Can't remember	Moderately	Very often	Occasionally	No	No	No	Yes	No	Yes	Yes	No	Yes	Yes	Graduate Student	Used code of silence (did not report)	Other
1	Lab Supervisor	Male	White	36-45	Occasionally	Seldom	Can't remember	Can't remember	Occasionally	Seldom	Seldom	Can't remember	Seldom	Moderately	Can't remember	Can't remember	Can't remember	Moderately	Very often	No	No	No	No	No	No	No	No	No	No	Graduate Student	Used code of silence (did not report)	Fear of retaliation		65
1	Principal Investigator	Female	White	46-55	Occasionally	Can't remember	Can't remember	Can't remember	Moderately	Very often	Moderately	Very often	Very often	Occasionally	Seldom	Very often	Very often	Very often	Moderately	No	No	No	No	Yes	No	No	No	No	Yes	Graduate Student	Sought support from colleagues/friends/family	Fear of retaliation	Other	65
1	Department Chair	Female	White	46-55	Very often	Very often	Very often	Very often	Very often	Very often	Very often	Very often	Very often	Very often	Very often	Very often	Very often	Very often	Very often	Yes	No	No	Yes	Yes	No	No	No	No	Yes	Other	Other		Other	187	5
1	Principal Investigator	Female	White	46-55	Moderately	Very often	Very often	Very often	Very often	Very often	Seldom	Very often	Very often	Very often	Very often	Very often	Very often	Very often	Very often	No	No	No	Yes	No	No	No	No	No	Yes	Other	Reported to my institution/body responsible for your institution		Other	187	39
1	Group Leader	Female	White0	46-55	Seldom	Occasionally	Can't remember	Can't remember	Occasionally	Very often	Very often	Very often	Very often	Very often	Very often	Moderately	Moderately	Very often	Moderately	Yes	Yes	Yes	Yes	Yes	Yes	Yes	Yes	Yes	Yes	Graduate Student	Sought support from colleagues/friends/family	Fear of retaliation	Unfair and biased	161
1	Principal Investigator	Male	Asian	46-55	Seldom	Seldom	Seldom	Seldom	Seldom	Very often	Very often	Seldom	Very often	Very often	Very often	Very often	Very often	Very often	Very often	Yes	No	No	Yes	Yes	Yes	Yes	Yes	Yes	No	Postdoc	Reported to my institution/body responsible for your institution	Other	Other	36
1	Principal Investigator	Male	White	36-45	Very often	Seldom	Can't remember	Can't remember	Very often	Very often	Very often	Very often	Very often	Very often	Very often	Can't remember	Very often	Can't remember	Can't remember	No	No	No	Yes	No	No	No	No	No	Yes	Postdoc	Sought support from colleagues/friends/family	Fear of retaliation		187	45
1	Principal Investigator	Female	White	Over 66	Moderately	Very often	Moderately	Moderately	Moderately	Very often	Moderately	Very often	Occasionally	Occasionally	Occasionally	Seldom	Occasionally	Moderately	Very often	No	No	No	Yes	Yes	No	No	No	No	Yes	Other	Reported to my institution/body responsible for your institution	Other	Other	187	5
1	Principal Investigator	Male	White	56-65	Moderately	Moderately		Can't remember	Can't remember	Very often	Very often	Very often	Can't remember	Moderately	Very often	Very often	Very often	Can't remember	Very often	Yes	No	No	Yes	Yes	No	No	No	No	Yes	Other	Used code of silence (did not report)	Fear of retaliation	Other
1
1	Principal Investigator	Male	White	56-65	Seldom	Very often	Can't remember	Can't remember	Very often	Very often	Very often	Can't remember	Very often	Very often	Can't remember	Can't remember	Moderately	Can't remember	Can't remember	Yes	No	No	No	Yes	No	No	No	No	No	Other	Reported to my institution/body responsible for your institution	Fear of retaliation	Other	65	53
1	Principal Investigator	Female	White	56-65	Very often	Very often	Moderately	Very often	Very often	Very often	Very often	Very often	Can't remember	Can't remember	Seldom	Can't remember	Moderately	Very often	Very often	No	No	No	No	Yes	No	No	No	No	No	Visiting Scientist/Researcher	Reported to my institution/body responsible for your institution		Unfair and biased	187	22
1	Department Chair	Female	White	56-65	Very often	Very often	Moderately	Moderately	Very often	Moderately	Moderately	Very often	Occasionally	Seldom	Seldom	Moderately	Moderately	Moderately	Moderately	No	No	No	No	Yes	No	No	No	No	No	Other	Reported to my institution/body responsible for your institution	Fear of retaliation	Fair and unbiased	187	41
1	Department Chair	Male	White	56-65	Moderately	Occasionally	Can't remember	Can't remember	Can't remember	Seldom	Can't remember	Occasionally	Very often	Can't remember	Can't remember	Can't remember	Can't remember	Very often	Very often	No	No	No	No	No	No	No	No	No	Yes	Postdoc	Reported to my institution/body responsible for your institution	Fear of being fired	Fair and unbiased	65
1	Principal Investigator	Female	Black or African American	36-45	Moderately	Moderately	Occasionally	Can't remember	Occasionally	Occasionally	Moderately	Moderately	Can't remember	Occasionally	Occasionally	Can't remember	Very often	Moderately	Moderately	No	No	No	Yes	No	No	No	No	No	No	Other	Sought support from colleagues/friends/family	Other		187	23
1	Lab Supervisor	Female	White	25-35	Occasionally	Seldom	Seldom	Can't remember	Seldom	Very often	Can't remember	Moderately	Can't remember	Can't remember	Occasionally	Very often	Seldom	Very often	Very often	No	No	No	No	Yes	No	No	No	No	No	Other	Sought support from colleagues/friends/family	Fear of retaliation		187	21
1	Principal Investigator	Male	East Indian	56-65	Occasionally		Occasionally	Occasionally	Occasionally	Moderately	Moderately	Very often	Occasionally	Can't remember	Very often	Can't remember	Very often	Very often	Very often	No	No	No	Yes	Yes	No	Yes	No	Yes	Yes	Other	Reported to my institution/body responsible for your institution		Unfair and biased	185
1	Lab Supervisor	Male	White	56-65	Can't remember		Seldom	Seldom	Occasionally	Occasionally	Very often	Very often	Can't remember	Occasionally	Very often	Very often	Very often	Very often	Occasionally	No	No	No	No	No	No	No	No	Yes	No	Postdoc	Reported to my institution/body responsible for your institution		Unfair and biased
1	Principal Investigator	Male	White	Over 66	Can't remember	Can't remember	Can't remember	Occasionally	Occasionally	Occasionally	Occasionally	Can't remember	Can't remember	Can't remember	Occasionally	Can't remember	Occasionally	Occasionally	Can't remember	No	No	No	No	No	No	No	No	No	Yes	Other	Sought support from colleagues/friends/family	Other	Other	185
1	Principal Investigator	Male	White	46-55	Moderately	Can't remember	Can't remember	Can't remember	Very often	Occasionally	Moderately	Moderately	Can't remember	Can't remember	Moderately	Can't remember	Seldom	Very often	Very often	No	No	No	Yes	Yes	Yes	No	No	No	No	Postdoc	Reported to my institution/body responsible for your institution	Other	Other
1	Principal Investigator	Male	White	56-65	Very often	Very often	Very often	Very often	Very often	Very often	Very often	Very often	Very often	Occasionally	Very often	Very often	Very often	Very often	Very often	No	No	No	Yes	Yes	No	No	Yes	No	Yes	Graduate Student	Sought support from colleagues/friends/family	Fear of being fired		169
1	Department Chair	Male	White	56-65						Very often										Yes	No	No	No	Yes	Yes					Other	Other	Other		161
1	Principal Investigator	Male	Middle Eastern	46-55	Moderately	Very often	Moderately	Moderately	Moderately	Occasionally	Moderately	Moderately	Moderately	Moderately	Moderately	Moderately	Very often	Moderately	Moderately	Yes	Yes	Yes	Yes	Yes	Yes	Yes	Yes	Yes	Yes	Postdoc	Used code of silence (did not report)	Fear of retaliation		187	22
1	Principal Investigator
1	Department Chair	Female	Black or African American	Over 66	Can't remember	Can't remember	Moderately	Moderately	Very often	Moderately	Occasionally	Can't remember	Very often	Seldom	Very often	Can't remember	Very often	Very often	Very often	Yes	No	No	Yes	Yes	Yes	Yes	No	No	Yes	Other	Reported to my institution/body responsible for your institution	Other	Unfair and biased	187	45
1	Principal Investigator	Female	Asian	Over 66	Occasionally	Very often	Moderately	Occasionally	Very often	Very often	Very often	Very often	Moderately	Very often	Moderately	Can't remember	Very often	Can't remember	Occasionally	No	No	Yes	Yes	Yes	No	No	No	No	Yes	Postdoc	Used code of silence (did not report)	Fear of retaliation	Other	187	22
1	Group Leader	Female	Black or African American	36-45	Can't remember	Can't remember	Moderately	Can't remember	Can't remember	Can't remember		Very often	Occasionally	Seldom	Very often	Can't remember	Very often	Very often	Very often	No	No	No	Yes	Yes		Yes	No	No	Yes	Other	Reported to my institution/body responsible for your institution		Other	187	48
1	Group Leader	Female	White	36-45	Moderately	Seldom	Occasionally	Occasionally	Moderately	Occasionally	Moderately	Moderately	Seldom	Seldom	Moderately	Moderately	Very often	Moderately	Moderately	Yes	No	No	Yes	Yes	No	No	Yes	Yes	Yes	Visiting Scientist/Researcher	Used code of silence (did not report)	Fear of retaliation	Other
1	Department Chair	Female	White	25-35	Occasionally	Can't remember	Occasionally	Can't remember	Can't remember	Occasionally	Occasionally	Can't remember	Very often	Can't remember	Can't remember	Occasionally	Can't remember	Can't remember	Occasionally	No	No	No	No	Yes	No	No	No	No	No	Postdoc	Reported to my institution/body responsible for your institution	Other	Other
1	Department Chair
1	Group Leader
1	Principal Investigator
1	Principal Investigator	Male	White	46-55	Very often	Occasionally	Occasionally	Moderately	Very often	Very often	Very often	Very often	Very often	Occasionally	Moderately	Very often	Very often	Very often	Very often	Yes	Yes	No	Yes	Yes	Yes	No	Yes	No	Yes	Visiting Scientist/Researcher	Reported to my institution/body responsible for your institution		Unfair and biased	185	3
1	Department Chair
1	Principal Investigator
1	Department Chair
1	Principal Investigator	Female	White	46-55	Moderately		Seldom	Very often	Very often	Seldom	Seldom	Very often	Very often	Very often	Very often		Very often		Very often	Yes	No	No	Yes	Yes	No	Yes	No	Yes	Yes	Visiting Scientist/Researcher	Reported to my institution/body responsible for your institution		Unfair and biased	9
1	Principal Investigator
1	Principal Investigator	Male	Middle Eastern	46-55	Occasionally	Very often	Very often	Very often	Very often	Very often	Seldom	Very often	Very often	Very often	Very often	Seldom	Very often	Very often	Seldom	Yes	No	No	No	No	No	Yes	Yes	Yes	Yes	Postdoc	Reported to my institution/body responsible for your institution	Fear of retaliation	Other	187	22
1	Principal Investigator	Female	White	46-55	Very often	Very often	Very often	Very often	Very often	Very often	Very often	Very often	Very often	Can't remember	Very often	Moderately	Very often	Very often	Very often	Yes	No	Yes	Yes	Yes	No	Yes	No	Yes	No	Graduate Student	Reported to my institution/body responsible for your institution		Unfair and biased
1	Principal Investigator	Male	White	56-65	Occasionally	Very often	Can't remember	Seldom	Can't remember	Seldom	Can't remember	Can't remember	Moderately	Moderately	Can't remember	Can't remember	Can't remember	Moderately	Seldom	No	No	No	No	No	Yes	Yes	Yes	No	No	Graduate Student	Sought support from colleagues/friends/family	Fear of retaliation	Unfair and biased	185
1	Group Leader	Male	White	46-55	Can't remember	Occasionally	Can't remember	Can't remember	Can't remember	Very often	Very often	Occasionally	Can't remember	Occasionally	Moderately	Can't remember	Can't remember	Very often	Very often	Yes	No	No	Yes	Yes	Yes	No	Yes	Yes	No	Postdoc	Reported to my institution/body responsible for your institution	Fear of retaliation	Unfair and biased	163
1	Principal Investigator	Male	White	56-65	Seldom	Can't remember	Can't remember	Seldom	Moderately	Can't remember	Can't remember	Can't remember	Can't remember	Seldom	Very often	Very often	Very often	Very often	Very often	No	No	No	Yes	Yes	No	Yes	No	Yes	No	Graduate Student	Reported to my institution/body responsible for your institution	Other	Unfair and biased	65
1	Group Leader
1	Group Leader	Female	White	46-55	Very often	Can't remember	Moderately	Can't remember	Moderately	Very often	Moderately	Very often	Very often	Very often	Very often	Very often	Very often	Very often	Very often	Yes	No	No	Yes	Yes	Yes	Yes	No	Yes	Yes	Postdoc	Reported to my institution/body responsible for your institution	Fear of retaliation	Unfair and biased	185	53
1
1	Principal Investigator	Male	Asian	36-45	Seldom	Moderately	Seldom	Very often	Moderately	Very often	Very often	Very often	Very often	Seldom	Can't remember	Seldom	Occasionally	Can't remember	Moderately	Yes	No	Yes	Yes	Yes	Yes	No	No	No	Yes	Graduate Student	Used code of silence (did not report)	Fear of retaliation		187	34
1	Principal Investigator	Male	White0	36-45	Very often	Very often	Very often	Very often	Moderately	Very often	Very often	Occasionally	Very often	Very often	Very often	Very often	Very often	Very often	Very often	No	No	Yes	Yes	Yes	Yes	Yes	No	Yes	Yes	Graduate Student	Other	Fear of retaliation		78
1	Principal Investigator	Male	Mixed Race	36-45	Occasionally	Moderately	Can't remember	Can't remember	Occasionally	Occasionally	Occasionally	Can't remember	Moderately	Moderately	Seldom	Can't remember	Occasionally	Very often	Moderately	No	No	No	No	No	No	No	No	No	No	Postdoc	Sought support from colleagues/friends/family		Fair and unbiased
1	Lab Supervisor	Female	White	36-45	Very often	Moderately	Seldom	Seldom	Very often	Occasionally	Occasionally	Very often	Moderately	Moderately	Very often	Moderately	Very often	Very often	Very often	Yes	No	Yes	Yes	Yes	Yes	Yes	Yes	Yes	Yes	Graduate Student	Reported to my institution/body responsible for your institution	Fear of retaliation	Unfair and biased	187	30
1	Principal Investigator	Male	White	46-55	Very often	Moderately	Very often	Very often	Very often	Very often	Very often	Very often	Very often	Very often	Very often	Can't remember	Very often	Very often	Very often	No	No	Yes	No	Yes	No	No	No	No	No	Other	Reported to my institution/body responsible for your institution	Other	Unfair and biased
1	Department Chair
1	Principal Investigator	Male	Asian	56-65	Very often	Very often	Moderately	Very often	Very often	Occasionally	Very often	Moderately	Moderately	Seldom	Seldom	Occasionally	Occasionally	Moderately	Seldom	No	No	No	No	No	No	No	No	No	No	Undergraduate Student	Other	Other		156
1	Principal Investigator	Male	White	36-45	Seldom	Can't remember	Seldom	Can't remember	Occasionally	Moderately	Can't remember	Occasionally	Very often	Seldom	Moderately	Can't remember	Very often	Very often	Very often	No	No	Yes	No	Yes	No	Yes	No	Yes	No	Graduate Student	Reported to my institution/body responsible for your institution	Other	Unfair and biased	65
1	Principal Investigator	Male	White	46-55	Occasionally	Moderately	Moderately	Very often	Moderately	Very often	Very often	Very often	Very often	Very often	Very often	Can't remember	Moderately	Very often	Very often	No	No	No	Yes	Yes	Yes	Yes	Yes	Yes	Yes	Graduate Student	Reported to my institution/body responsible for your institution		Unfair and biased	65
1
1	Group Leader
1	Principal Investigator	Female	White	56-65	Moderately	Very often	Very often	Very often	Very often	Moderately	Moderately	Very often	Very often	Moderately	Very often	Very often	Very often	Moderately	Moderately	Yes	No	No	Yes	Yes	No	Yes	No	Yes	No	Other	Other	Fear of retaliation	Other	153
1	Principal Investigator	Female	White	56-65	Seldom	Can't remember	Seldom	Can't remember	Can't remember	Occasionally	Occasionally	Can't remember	Seldom	Seldom	Moderately	Can't remember	Seldom	Can't remember	Can't remember	No	No	No	Yes	No	Yes	Yes	No	No	No	Other	Sought support from colleagues/friends/family	Fear of retaliation	Unfair and biased	187	34
1	Department Chair	Male	Asian	46-55	Very often	Moderately	Seldom	Seldom	Very often	Very often	Very often	Very often	Very often	Seldom	Moderately	Can't remember	Very often	Moderately	Very often	Yes	Yes	No	No	Yes	Yes	Yes	No	Yes	Yes	Visiting Scientist/Researcher	Sought support from colleagues/friends/family	Other	Other	78
1	Department Chair	Male	White	46-55	Occasionally	Moderately	Moderately	Moderately	Very often	Very often	Very often	Very often	Moderately	Occasionally	Occasionally	Occasionally	Very often	Very often	Very often	Yes	Yes	No	No	Yes	Yes	No	No	No	Yes	Graduate Student	Sought support from colleagues/friends/family	Fear of retaliation	Unfair and biased	187	5
1	Principal Investigator	Male	Asian	46-55	Moderately	Moderately	Moderately	Occasionally	Moderately	Seldom	Moderately	Moderately	Can't remember	Can't remember	Can't remember	Moderately	Can't remember	Can't remember	Seldom	No	No	No	No	No	No	No	No	No	No	Postdoc	Sought support from colleagues/friends/family	Visa issues		187	34
1	Principal Investigator	Male	White	56-65	Occasionally					Moderately	Moderately		Very often		Occasionally		Moderately	Very often	Very often	Yes	No			Yes				Yes		Postdoc	Reported to my institution/body responsible for your institution		Other	65
1	Department Chair	Male	White	56-65	Occasionally	Seldom	Can't remember	Can't remember	Can't remember	Moderately	Moderately	Can't remember	Can't remember	Can't remember	Very often	Moderately	Very often	Can't remember	Occasionally	Yes	No	No	No	Yes	Yes	Yes	No	Yes	Yes	Other	Sought support from colleagues/friends/family	Fear of retaliation	Other
1	Group Leader
1	Principal Investigator
1	Principal Investigator	Female	White	46-55	Moderately	Occasionally	Can't remember	Can't remember	Can't remember	Can't remember	Occasionally	Can't remember	Moderately	Can't remember	Can't remember	Can't remember	Can't remember	Can't remember	Can't remember	No	No	No	No	No	No	No	No	No	No	Postdoc	Sought support from colleagues/friends/family	Fear of retaliation		187	49
1	Principal Investigator
1	Department Chair	Female	White	25-35	Moderately	Can't remember	Can't remember	Occasionally	Can't remember	Can't remember	Can't remember	Can't remember	Moderately	Can't remember	Can't remember	Moderately	Can't remember	Can't remember	Can't remember	No	No	No	No	No	No	No	No	No	No	Graduate Student	Sought support from colleagues/friends/family	Fear of being fired	Unfair and biased	187	3
1	Department Chair	Female	White	36-45	Very often	Very often	Occasionally	Very often	Moderately	Very often	Very often	Moderately	Can't remember	Very often	Very often	Occasionally	Very often	Moderately	Very often	Yes	No	No	Yes	Yes	No	No	No	No	Yes	Other	Reported to my institution/body responsible for your institution	Fear of retaliation	Unfair and biased	187	49
1	Department Chair	Female	Hispanic	56-65	Occasionally	Very often	Occasionally	Very often	Very often	Very often	Very often	Very often	Very often	Seldom	Seldom	Seldom	Very often	Very often	Very often	No	No	No	No	Yes	No	No	No	No	No	Other	Reported to my institution/body responsible for your institution	Fear of retaliation	Other	187	23
1	Principal Investigator	Other genders	White	36-45	Very often	Very often	Can't remember	Can't remember	Can't remember	Very often	Very often	Can't remember	Seldom	Can't remember	Can't remember	Moderately	Can't remember	Can't remember	Seldom	No	No	No	No	Yes	No	No	No	No	Yes	Graduate Student	Used code of silence (did not report)	Visa issues	Other	122
1	Department Chair
1	Principal Investigator	Male	White	36-45	Can't remember	Can't remember	Can't remember	Can't remember	Can't remember	Can't remember	Can't remember	Can't remember	Can't remember	Can't remember	Can't remember	Can't remember	Seldom	Can't remember	Can't remember	No	No	No	Yes	No	No	No	No	No	Yes	Graduate Student	Reported to my institution/body responsible for your institution		Other	187	15
1	Principal Investigator
1	Principal Investigator	Female	White	46-55	Can't remember	Very often	Occasionally	Very often	Very often	Very often	Very often	Very often	Seldom	Can't remember	Can't remember	Can't remember	Very often	Can't remember	Can't remember	Yes	No	No	No	No	No	No	No	No	Yes	Graduate Student	Reported to my institution/body responsible for your institution		Fair and unbiased
1	Principal Investigator
1	Group Leader
1	Principal Investigator	Male	White	Over 66	Moderately	Moderately	Moderately	Moderately	Moderately	Moderately	Moderately	Moderately	Moderately	Moderately	Moderately	Moderately	Moderately	Moderately	Moderately	No	No	No	No	Yes	No	No	Yes	No	Yes	Other	Used code of silence (did not report)	Fear of retaliation		187	23
1	Principal Investigator
1	Principal Investigator	Female	White	46-55	Occasionally	Occasionally	Occasionally	Seldom	Very often	Seldom	Seldom	Moderately	Very often	Very often	Can't remember	Moderately	Moderately	Moderately	Can't remember	No	No	Yes	No	No	No	Yes	Yes	No	No	Undergraduate Student	Sought support from colleagues/friends/family	Fear of retaliation		187	5
1	Principal Investigator	Female	White	Over 66		Occasionally		Occasionally	Occasionally	Occasionally	Occasionally	Occasionally	Seldom	Seldom	Occasionally	Seldom	Occasionally	Seldom	Seldom	No	No	Yes	Yes	No	No	Yes	No	No	Yes	Graduate Student	Used code of silence (did not report)	Fear of retaliation
1	Principal Investigator	Male	White	56-65	Occasionally	Moderately	Moderately	Occasionally	Moderately	Moderately	Moderately	Moderately	Seldom	Can't remember	Moderately	Occasionally	Seldom	Very often	Very often		No	Yes	No	Yes	Yes	Yes	Yes	Yes	Yes	Graduate Student	Reported to my institution/body responsible for your institution		Other	169
1	Principal Investigator
1	Group Leader
1	Principal Investigator	Other genders	White	56-65	Can't remember	Very often	Can't remember	Can't remember	Can't remember	Very often	Moderately	Can't remember	Very often	Can't remember	Can't remember	Seldom	Very often	Very often	Can't remember	No	No	No	No	No	No	No	No	No	No	Postdoc	Sought support from colleagues/friends/family	Other		163
1	Group Leader	Male	Asian	36-45	Moderately	Very often	Occasionally	Very often	Very often	Very often	Very often	Very often	Occasionally	Can't remember	Seldom	Very often	Seldom	Very often	Very often	No	No	No	No	Yes	No	No	No	No	Yes	Other	Sought support from colleagues/friends/family	Fear of retaliation	Other	187	51
1	Principal Investigator	Female	Mixed Race	46-55	Very often	Very often	Very often	Occasionally	Very often	Very often	Very often	Very often	Very often	Very often	Moderately	Occasionally	Occasionally	Very often	Very often	No	No	Yes	No	No	No	No	No	No	No	Graduate Student	Sought support from colleagues/friends/family	Fear of retaliation	Unfair and biased	187	45
1	Principal Investigator	Male	Mixed Race	36-45	Very often	Very often	Moderately	Very often	Very often	Moderately	Moderately	Very often	Very often	Very often	Very often	Can't remember	Moderately	Very often	Very often			Yes	Yes	No	Yes	Yes		Yes	Yes	Graduate Student	Reported to my institution/body responsible for your institution		Other	185
1	Group Leader	Male	White	36-45	Moderately	Can't remember	Occasionally	Can't remember	Can't remember	Occasionally	Moderately	Can't remember	Can't remember	Can't remember	Occasionally	Seldom	Can't remember	Occasionally	Can't remember	No	No	No	Yes	No	No	No	Yes	Yes	No	Visiting Scientist/Researcher	Reported to my institution/body responsible for your institution	Other	Unfair and biased	24	53
1	Lab Supervisor
1	Department Chair	Female	Hispanic	46-55		Occasionally				Very often	Moderately	Moderately	Very often						Very often					Yes						Other	Reported to my institution/body responsible for your institution		Unfair and biased	187	7
1	Principal Investigator
1	Principal Investigator	Male	White	56-65	Occasionally	Occasionally	Seldom	Can't remember	Moderately	Moderately	Very often	Very often	Occasionally	Very often	Very often	Occasionally	Very often	Very often	Very often	Yes	No	Yes	Yes	Yes	Yes	Yes	No	Yes	No	Graduate Student	Reported to my institution/body responsible for your institution	Fear of retaliation	Unfair and biased	31
1	Lab Supervisor	Female	East Indian	36-45	Occasionally	Very often	Very often	Occasionally	Very often	Can't remember	Occasionally	Moderately	Occasionally	Moderately	Seldom	Seldom	Very often	Seldom	Can't remember	No	No	Yes	Yes	No	No	No	No	No	Yes	Graduate Student	Used code of silence (did not report)	Fear of retaliation	Unfair and biased
1
1	Group Leader
1	Group Leader
1	Department Chair
1	Principal Investigator	Female	East Indian	46-55	Very often	Very often	Occasionally	Very often	Very often	Very often	Very often	Very often	Very often	Very often	Can't remember	Can't remember	Very often	Can't remember	Very often	No	No	No	Yes	Yes	No	No	No	No	Yes	Graduate Student	Used code of silence (did not report)	Fear of retaliation	Other	187	23
1	Group Leader
1	Department Chair	Male	White	56-65	Very often	Occasionally	Very often	Moderately	Seldom	Moderately	Very often	Very often	Can't remember	Can't remember	Can't remember	Can't remember	Can't remember	Can't remember	Moderately	No	No	No	No	Yes	No	No	No	No	No	Postdoc	Sought support from colleagues/friends/family	Fear of retaliation		185
1	Department Chair	Male	White	36-45																										Visiting Scientist/Researcher	Used code of silence (did not report)	Other		185
1	Department Chair	Male	White	36-45	Occasionally	Occasionally	Can't remember	Can't remember	Moderately	Moderately	Moderately	Very often	Can't remember	Moderately	Very often	Can't remember	Moderately	Moderately	Moderately	Yes	Yes	No	No	Yes	No	No	No	No	Yes	Other	Other	Visa issues	Other	187	48
1	Principal Investigator	Female	Black or African American	36-45	Can't remember	Seldom	Can't remember	Can't remember	Moderately	Moderately	Can't remember	Seldom	Moderately	Can't remember	Very often	Occasionally	Occasionally	Can't remember	Can't remember	Yes	No	No	No	No	Yes	Yes	No	Yes	No	Graduate Student	Sought support from colleagues/friends/family	Fear of retaliation	Unfair and biased	187	7
1	Department Chair	Male	White	56-65	Occasionally	Can't remember	Very often	Can't remember	Can't remember	Very often	Occasionally	Can't remember	Seldom	Occasionally	Occasionally	Can't remember	Occasionally	Can't remember	Occasionally						Yes	No	No	No	No	Other	Sought support from colleagues/friends/family	Fear of retaliation	Other
1	Principal Investigator	Female	East Indian	46-55	Occasionally	Occasionally	Occasionally	Moderately	Very often	Moderately	Moderately	Moderately	Very often	Very often	Very often	Very often	Very often	Very often	Very often	No	No	No	Yes	Yes	Yes	Yes	No	No	Yes	Other	Reported to my institution/body responsible for your institution		Unfair and biased	187	33
1	Principal Investigator
1	Principal Investigator	Female	Asian	36-45	Moderately	Moderately	Occasionally	Moderately	Moderately	Occasionally	Occasionally	Occasionally	Occasionally	Occasionally		Moderately	Moderately	Moderately	Moderately	No	No	No	No	No	No	No	No	No	No	Graduate Student	Reported to my institution/body responsible for your institution	Visa issues	Fair and unbiased
1	Principal Investigator	Male	White	46-55	Very often	Very often	Very often	Very often	Very often	Very often	Very often	Very often	Very often	Very often	Very often	Very often	Very often	Very often	Very often	No	No	Yes	Yes	Yes	Yes	No	No	Yes	Yes	Postdoc	Reported to my institution/body responsible for your institution	Fear of retaliation	Unfair and biased
1	Department Chair	Male	White	56-65	Moderately	Moderately	Very often	Moderately	Occasionally	Occasionally	Moderately	Seldom	Occasionally	Seldom	Very often	Can't remember	Moderately	Seldom	Moderately	Yes	No	No	No	Yes	No	No	No	No	Yes	Other	Sought support from colleagues/friends/family	Fear of retaliation	Other	169
1	Principal Investigator	Male	Asian	56-65	Very often	Occasionally	Seldom	Very often	Very often	Very often	Very often	Very often	Very often	Very often		Moderately	Occasionally	Very often	Occasionally				Yes	Yes					Yes	Postdoc	Sought support from colleagues/friends/family	Fear of retaliation	Unfair and biased
1	Department Chair	Female	White	46-55	Can't remember	Occasionally	Can't remember	Very often	Can't remember	Very often	Moderately	Can't remember	Very often	Moderately	Very often	Can't remember	Very often	Can't remember	Very often	Yes	No	No	No	Yes	No	No	No	No	No	Other	Used code of silence (did not report)	Fear of retaliation	Other	185
1	Group Leader
1	Department Chair
1	Principal Investigator
1	Principal Investigator	Male	White	46-55	Occasionally	Very often	Moderately	Very often	Very often	Can't remember	Very often	Seldom	Occasionally	Occasionally	Very often	Seldom	Very often	Seldom	Occasionally	No	No	No	No	Yes	Yes	Yes	No	No	No	Postdoc	Used code of silence (did not report)	Fear of retaliation	Unfair and biased	185
1	Department Chair	Female	White	36-45	Occasionally	Occasionally	Occasionally		Occasionally	Very often	Seldom	Occasionally	Very often	Can't remember	Occasionally	Occasionally	Occasionally	Can't remember	Occasionally	Yes	No	No	No	Yes	No	Yes		No	Yes	Other	Sought support from colleagues/friends/family	Fear of retaliation	Other	187	1
1	Group Leader	Male	White	36-45	Moderately	Occasionally	Seldom	Occasionally	Moderately	Occasionally	Occasionally	Occasionally	Occasionally	Moderately	Moderately	Occasionally	Very often	Very often	Very often	Yes	No	Yes	Yes	No	Yes	Yes	No	No	Yes	Postdoc	Sought support from colleagues/friends/family	Fear of retaliation	Other	84
1	Group Leader
1	Principal Investigator	Female	Asian	36-45	Moderately	Very often	Very often	Very often	Seldom	Moderately	Moderately	Very often	Can't remember	Can't remember	Can't remember	Moderately	Moderately	Moderately	Moderately	No	No	No	No	No	No	No	No	No	No	Visiting Scientist/Researcher	Used code of silence (did not report)	Fear of retaliation	Other	78
1	Principal Investigator	Male	Hispanic	36-45	Seldom	Occasionally	Occasionally	Occasionally	Very often	Moderately	Moderately	Seldom	Very often	Very often	Moderately	Can't remember	Occasionally	Moderately	Occasionally	Yes	No	No	Yes	No	No	No	Yes	No	Yes	Postdoc	Sought support from colleagues/friends/family	Fear of retaliation	Unfair and biased	187	6
1	Principal Investigator	Female	White	36-45	Occasionally	Occasionally	Occasionally	Moderately	Can't remember	Very often	Moderately	Moderately	Seldom	Can't remember	Moderately	Can't remember	Very often	Moderately	Moderately	Yes	No	Yes	No	Yes	Yes	Yes	No	Yes	Yes	Graduate Student	Sought support from colleagues/friends/family	Fear of being fired	Unfair and biased	169
1	Lab Supervisor	Male	Hispanic	36-45	Occasionally	Occasionally	Moderately	Moderately	Moderately	Moderately	Moderately	Occasionally	Seldom	Moderately	Moderately	Moderately	Moderately	Moderately	Moderately	No	No	No	Yes	No	No	No	No	No	No	Undergraduate Student	Reported to my institution/body responsible for your institution	Fear of retaliation	Unfair and biased
1	Principal Investigator	Male	Middle Eastern	36-45	Very often	Occasionally	Occasionally	Moderately	Can't remember	Occasionally	Seldom	Seldom	Can't remember	Moderately	Moderately	Moderately	Moderately	Occasionally	Moderately	No	No	No	No	No	No	Yes	No	No	Yes	Postdoc	Sought support from colleagues/friends/family	Fear of retaliation		185
1	Department Chair	Prefer not to specify	White	56-65	Can't remember	Can't remember	Can't remember	Can't remember	Can't remember	Can't remember	Can't remember	Very often	Moderately	Can't remember	Moderately	Can't remember	Occasionally	Moderately	Moderately	No	No	No	No	Yes	No	Yes	No	No	No	Other	Reported to my institution/body responsible for your institution	Fear of retaliation	Unfair and biased	161
1	Lab Supervisor
1	Department Chair
1	Principal Investigator
1	Department Chair
1	Department Chair
1
1	Principal Investigator
1	Principal Investigator	Male	White	56-65	Seldom	Seldom	Seldom	Seldom	Seldom	Moderately	Seldom	Occasionally	Moderately	Very often	Very often	Seldom	Very often	Very often	Very often	Yes	No	No	Yes	Yes	Yes	Yes	Yes	Yes	Yes	Other	Reported to my institution/body responsible for your institution	Fear of retaliation	Unfair and biased	9
1	Principal Investigator	Female	White	36-45	Occasionally	Seldom	Moderately	Seldom	Seldom	Occasionally	Seldom	Very often	Occasionally	Very often	Very often	Very often	Very often	Very often	Very often	Yes	No	Yes	Yes	Yes	Yes	Yes	No	Yes	Yes	Graduate Student	Reported to my institution/body responsible for your institution		Fair and unbiased	185
1	Principal Investigator	Male	White	56-65	Seldom	Moderately	Moderately	Occasionally	Moderately	Very often	Can't remember	Very often	Can't remember	Can't remember	Seldom	Occasionally	Seldom	Very often	Seldom	No	No	Yes	No	Yes	Yes	Yes	No	No	No	Graduate Student	Sought support from colleagues/friends/family	Fear of retaliation		187	49
1	Department Chair	Male	Middle Eastern	46-55	Very often	Very often	Very often	Very often	Very often	Very often	Very often	Very often	Very often	Very often	Very often	Can't remember	Very often	Very often	Very often	Yes	No	No	Yes	Yes	No	No	No	No	Yes	Other	Reported to my institution/body responsible for your institution		Unfair and biased	187	1
1	Principal Investigator	Male	Hispanic	46-55	Moderately	Very often	Seldom	Can't remember	Very often	Very often	Occasionally	Occasionally	Very often	Occasionally	Very often	Occasionally	Very often	Very often	Very often	Yes	Yes	No	Yes	Yes	No	Yes	No	Yes	Yes	Postdoc	Sought support from colleagues/friends/family	Fear of being fired	Fair and unbiased
1	Principal Investigator	Male	White	46-55	Can't remember	Very often	Can't remember	Occasionally	Can't remember	Very often	Moderately	Can't remember	Can't remember	Moderately	Can't remember	Can't remember	Can't remember	Occasionally	Occasionally	Yes	No	No	Yes	Yes	Yes	Yes	No	Yes	No	Graduate Student	Reported to my institution/body responsible for your institution		Unfair and biased	185
1	Principal Investigator
1	Principal Investigator
1	Department Chair	Female	East Indian	46-55	Very often	Very often	Occasionally	Seldom	Very often	Occasionally	Very often	Seldom	Occasionally	Seldom	Moderately	Occasionally	Moderately	Occasionally	Occasionally	Yes	No	No	Yes	No	Yes	No	No	No	Yes	Graduate Student	Other	Other	Other	187
1	Department Chair
1	Department Chair
1	Principal Investigator	Male	White	56-65		Seldom	Can't remember		Moderately	Moderately																						Other
1	Group Leader	Female	White	56-65	Can't remember	Very often	Moderately	Can't remember	Moderately	Very often	Very often	Moderately	Can't remember	Can't remember	Very often	Very often	Very often	Can't remember	Occasionally	No	No	Yes	No	No	No	No	No	No	No	Postdoc	Used code of silence (did not report)	Fear of being fired		138
1	Principal Investigator	Female	White	56-65	Occasionally	Moderately	Very often	Occasionally	Very often	Moderately	Very often	Very often	Seldom	Can't remember	Occasionally	Very often	Moderately	Seldom	Seldom	No	No	Yes	Yes	Yes	No	No	No	No	Yes	Postdoc	Sought support from colleagues/friends/family	Fear of being fired	Unfair and biased	138
1	Principal Investigator	Female	White	56-65	Very often	Very often	Very often	Moderately	Moderately	Moderately	Very often	Moderately	Can't remember	Can't remember	Occasionally	Can't remember	Moderately	Very often	Can't remember	Yes	No	Yes	Yes	No	No	No	No	No	Yes	Visiting Scientist/Researcher	Sought support from colleagues/friends/family	Fear of retaliation		138
1
1	Department Chair
1	Principal Investigator	Female	Mixed Race	Over 66	Moderately	Very often	Seldom	Seldom	Very often	Very often	Moderately	Very often	Very often	Seldom	Moderately	Moderately	Moderately	Seldom	Occasionally	Yes	No	No	Yes	Yes	No	No	No	No	Yes	Postdoc	Sought support from colleagues/friends/family	Fear of retaliation		187	5
1	Principal Investigator	Male	White	46-55	Occasionally	Moderately	Very often	Very often	Very often	Very often	Very often	Moderately	Very often	Can't remember	Moderately	Occasionally	Moderately	Very often	Occasionally	Yes	No	No	Yes	No	Yes	No	No	No	Yes	Graduate Student	Sought support from colleagues/friends/family	Fear of retaliation	Other	185
1	Group Leader	Female	White	46-55	Very often	Very often	Seldom	Very often	Moderately	Moderately	Very often	Very often	Very often	Very often	Very often	Very often	Very often	Moderately	Moderately	Yes	No	No	No	Yes	No	No	No	No	Yes	Other	Reported to my institution/body responsible for your institution		Unfair and biased	187	39
1	Principal Investigator	Female	White0	36-45	Can't remember	Moderately	Seldom	Can't remember	Moderately	Seldom	Moderately	Moderately	Very often	Can't remember	Very often	Moderately	Very often	Very often	Very often	No	No	Yes	Yes	No	Yes	Yes	No	No	Yes	Undergraduate Student	Other	Fear of retaliation	Fair and unbiased
1	Principal Investigator	Male	White	46-55	Occasionally	Can't remember	Moderately	Moderately	Can't remember	Seldom	Occasionally	Can't remember	Can't remember	Can't remember	Can't remember	Occasionally	Can't remember	Can't remember	Can't remember	No	No	No	No	No	No	No	No	No	No	Postdoc	Sought support from colleagues/friends/family	Fear of retaliation		185
1	Group Leader
1	Principal Investigator
1	Principal Investigator	Female	White	56-65	Moderately	Moderately	Moderately	Moderately	Moderately	Occasionally	Moderately	Can't remember	Occasionally	Can't remember	Seldom	Seldom	Moderately	Seldom	Can't remember	No	No	Yes	No	No	No	No	No	No	Yes	Graduate Student	Used code of silence (did not report)	Fear of retaliation	Other	187	11
1	Principal Investigator	Male	White	46-55	Very often	Moderately	Occasionally	Can't remember	Very often	Very often	Very often	Very often	Very often	Occasionally	Moderately	Occasionally	Very often	Occasionally	Seldom	Yes	No	No	Yes	Yes	Yes	Yes	No	No	Yes	Graduate Student	Reported to my institution/body responsible for your institution		Unfair and biased	187	6
1	Principal Investigator	Female	White	56-65	Very often	Very often	Can't remember	Occasionally	Moderately	Seldom	Very often	Very often	Can't remember	Very often	Occasionally	Can't remember	Very often	Can't remember	Occasionally	No	No	No	Yes	Yes	Yes	No	No	Yes	Yes	Graduate Student	Reported to my institution/body responsible for your institution	Fear of retaliation	Unfair and biased	9
1	Group Leader	Male
1	Principal Investigator	Male	White	36-45	Very often	Very often	Moderately	Occasionally	Very often	Moderately	Very often	Occasionally	Can't remember	Seldom	Seldom	Moderately	Seldom	Moderately	Moderately	No	No	Yes	Yes	Yes	No	No	No	Yes	Yes	Graduate Student	Reported to my institution/body responsible for your institution		Unfair and biased	187	50
1	Lab Supervisor	Male	White	46-55	Occasionally	Seldom	Occasionally	Occasionally	Moderately	Moderately		Very often	Very often	Seldom	Seldom	Very often	Seldom	Very often	Very often	Yes	No	Yes	Yes	No	No	No	No	No	Yes	Graduate Student	Sought support from colleagues/friends/family	Fear of retaliation	Other	84
1	Principal Investigator	Female	White	56-65	Occasionally	Moderately	Can't remember	Seldom	Seldom	Seldom	Moderately	Can't remember	Seldom	Can't remember	Can't remember	Can't remember	Seldom	Moderately	Can't remember	No	Yes	No	No	No	No	No	No	No	Yes	Postdoc	Sought support from colleagues/friends/family	Fear of retaliation	Other	187	33
1	Lab Supervisor	Male	White	56-65	Very often	Very often	Very often	Very often	Very often	Very often	Very often	Very often	Moderately	Can't remember	Very often	Very often	Very often	Moderately	Very often	Yes	No	Yes	No	Yes	No	Yes	No	No	No	Graduate Student	Sought support from colleagues/friends/family		Other	84
1	Group Leader	Female	White	46-55	Very often	Very often	Very often	Very often	Moderately	Can't remember	Can't remember	Can't remember	Occasionally	Can't remember	Can't remember	Very often	Can't remember	Very often	Can't remember	No	No	No	No	No	No	No	No	Yes	No	Other	Used code of silence (did not report)	Fear of being fired	Other
1	Lab Supervisor	Male	Middle Eastern	25-35	Occasionally	Very often	Very often	Very often	Can't remember	Very often	Very often	Can't remember	Can't remember	Can't remember	Very often	Seldom	Very often	Very often	Very often	Yes	No	No	Yes	Yes	No	No	No	Yes	Yes	Visiting Scientist/Researcher	Sought support from colleagues/friends/family	Fear of being fired		163
1	Principal Investigator	Male	East Indian	46-55	Moderately	Can't remember	Moderately	Moderately	Moderately	Moderately	Moderately	Seldom	Moderately	Moderately	Very often	Seldom	Moderately	Occasionally	Occasionally	Yes	No	No	Yes	Yes	Yes	No	No	No	Yes	Postdoc	Reported to my institution/body responsible for your institution		Other	187	33
1	Principal Investigator	Male	White	46-55	Seldom	Moderately	Can't remember	Seldom	Can't remember	Very often	Very often	Occasionally	Moderately	Can't remember	Moderately	Can't remember	Occasionally	Occasionally	Moderately	No	No	Yes	Yes	Yes	No	No	No	No	No	Graduate Student	Reported to my institution/body responsible for your institution	Fear of retaliation	Unfair and biased	187	39
1	Department Chair	Male	White	46-55	Occasionally				Very often	Very often	Moderately	Very often		Very often	Very often	Very often	Very often	Moderately	Very often	No	No	No	No	Yes	No	No	No	No	No	Other	Sought support from colleagues/friends/family		Other	185
1	Principal Investigator	Male	White	46-55	Seldom	Seldom	Seldom	Seldom	Very often	Seldom	Occasionally	Can't remember	Very often	Seldom	Very often	Can't remember	Very often	Very often	Very often	No	No	No	No	No	No	Yes	No	Yes	Yes	Graduate Student	Sought support from colleagues/friends/family	Fear of retaliation	Unfair and biased	187	33
1	Principal Investigator	Male	White	25-35	Moderately	Very often	Occasionally	Very often	Moderately	Occasionally	Very often	Very often	Occasionally	Seldom	Very often	Moderately	Very often	Very often	Very often	Yes	No	No	Yes	Yes	Yes	No	Yes	Yes	Yes	Graduate Student	Reported to my institution/body responsible for your institution	Other	Unfair and biased	187	5
1	Group Leader
1	Principal Investigator	Male	White	46-55	Occasionally	Occasionally	Seldom	Occasionally	Moderately	Can't remember	Occasionally	Moderately	Very often	Can't remember	Can't remember	Can't remember	Occasionally	Very often	Moderately	No	No	No	No	No	No	No	No	No	No	Graduate Student	Sought support from colleagues/friends/family	Fear of retaliation		138
1	Principal Investigator	Male	Hispanic	25-35	Moderately	Moderately	Occasionally	Moderately	Moderately	Moderately	Moderately	Occasionally	Moderately	Seldom	Very often	Very often	Very often	Very often	Seldom	Yes	No	No	Yes	No	No	No	No	No	Yes	Graduate Student	Reported to my institution/body responsible for your institution		Unfair and biased	187	23
1	Department Chair
1	Lab Supervisor	Male	White	36-45	Seldom	Very often	Very often	Very often	Very often	Moderately	Seldom	Very often	Very often	Can't remember	Can't remember	Very often	Seldom	Very often	Very often	Yes	No	Yes	Yes	No	Yes	Yes	No	Yes	Yes	Undergraduate Student	Sought support from colleagues/friends/family	Fear of retaliation	Unfair and biased
1	Principal Investigator	Male	White	56-65	Moderately	Very often	Very often	Very often	Very often	Very often	Moderately	Very often	Very often	Very often	Very often	Very often	Very often	Very often	Occasionally	No	No	Yes	Yes	Yes	No	No	No	Yes	Yes	Postdoc	Sought support from colleagues/friends/family	Fear of retaliation
1	Principal Investigator	Male	White	36-45	Can't remember	Can't remember	Can't remember	Can't remember	Can't remember	Very often	Can't remember	Very often	Can't remember	Very often	Very often	Very often	Can't remember	Can't remember	Very often	Yes	No	No	No	Yes	Yes	No	No	No	No	Graduate Student	Used code of silence (did not report)	Fear of retaliation	Other	187	14
1	Department Chair
1	Department Chair	Female	White	56-65	Very often	Occasionally	Moderately	Occasionally	Very often	Very often	Very often	Moderately	Very often	Can't remember	Seldom	Moderately	Moderately	Moderately	Moderately	Yes	No	No	No	No	No	No	No	No	No	Other	Reported to my institution/body responsible for your institution	Other	Unfair and biased	187	48
1	Principal Investigator	Male	White	46-55	Very often	Occasionally	Very often	Very often	Very often	Very often	Moderately	Very often	Can't remember	Very often	Very often	Occasionally	Very often	Very often	Very often	Yes	No	No	Yes	Yes	No	Yes	Yes	Yes	Yes	Postdoc	Reported to my institution/body responsible for your institution		Unfair and biased	65
1	Lab Supervisor	Female	White	36-45	Moderately	Moderately	Very often	Very often	Very often	Very often	Very often	Very often	Very often	Very often	Very often	Very often	Very often	Very often	Very often	Yes	No	Yes	No	Yes	Yes	Yes	No	Yes	Yes	Visiting Scientist/Researcher	Reported to my institution/body responsible for your institution		Unfair and biased
1	Principal Investigator
1	Principal Investigator	Male	White	56-65	Very often	Very often	Very often	Moderately	Very often	Very often	Moderately	Moderately	Very often	Occasionally	Occasionally	Can't remember	Moderately	Occasionally	Moderately	Yes	No	Yes	No	Yes	No	No	No	No	No	Graduate Student	Used code of silence (did not report)	Fear of retaliation
1	Department Chair
1
1	Principal Investigator	Female	Hispanic	25-35	Seldom	Moderately	Can't remember	Seldom	Occasionally	Very often	Seldom	Moderately	Can't remember	Can't remember	Can't remember	Moderately	Seldom	Seldom	Seldom	No	No	No	No	No	No	Yes	No	No	No	Undergraduate Student	Sought support from colleagues/friends/family	Fear of retaliation		37
1	Group Leader	Female	White	56-65		Moderately	Can't remember	Moderately	Can't remember	Very often	Can't remember	Can't remember	Very often	Occasionally	Very often	Can't remember	Very often	Can't remember	Can't remember	No	No	No	No	Yes	Yes	Yes	Yes	Yes	No	Postdoc	Sought support from colleagues/friends/family	Fear of retaliation	Other	65
1	Principal Investigator	Female	Asian	36-45	Moderately	Moderately	Seldom	Moderately	Very often	Very often	Moderately	Moderately	Very often	Moderately	Occasionally	Moderately	Occasionally	Very often	Very often	Yes		Yes	Yes	Yes	No	No	No	No	Yes	Graduate Student	Reported to my institution/body responsible for your institution	Other	Unfair and biased	187	28
1	Department Chair
1	Department Chair	Male	White	46-55	Moderately	Moderately	Very often	Very often	Very often	Very often	Occasionally	Very often	Can't remember	Can't remember	Can't remember	Very often	Can't remember	Can't remember	Very often	Yes	No	No	No	No	No	No	No	No	No	Graduate Student	Sought support from colleagues/friends/family	Fear of retaliation	Unfair and biased	187	34
1	Principal Investigator	Male	Asian	36-45	Moderately	Occasionally	Moderately	Moderately	Moderately	Moderately	Moderately	Moderately	Seldom	Seldom	Seldom	Very often	Moderately	Can't remember	Can't remember	No	No	No	No	Yes	No	No	No	No	No	Other	Used code of silence (did not report)	Fear of retaliation	Other	187	48
1	Principal Investigator	Female	East Indian	25-35	Can't remember	Moderately		Moderately	Seldom	Can't remember	Moderately	Moderately	Very often	Can't remember	Very often	Can't remember	Moderately	Very often	Seldom	No	No	No	No	No	No	No	No	No	No	Graduate Student	Used code of silence (did not report)	Fear of retaliation
1	Lab Supervisor	Female	White	56-65	Occasionally	Very often	Can't remember	Seldom	Very often	Very often	Moderately	Moderately	Moderately	Very often	Very often	Moderately	Very often	Can't remember	Very often	Yes	No	Yes	Yes	Yes	No	No	Yes	No	Yes	Graduate Student	Reported to my institution/body responsible for your institution		Unfair and biased	31
1	Group Leader	Female	White0	46-55	Can't remember	Moderately	Occasionally	Seldom	Can't remember	Can't remember	Seldom	Seldom	Can't remember	Can't remember	Can't remember	Can't remember	Can't remember	Can't remember	Can't remember	No	No	No	No	No	No	No	No	No	No	Other	Used code of silence (did not report)	Other	Other	88
1	Principal Investigator	Female	Asian	25-35	Moderately	Occasionally	Occasionally	Can't remember	Occasionally	Seldom	Occasionally	Can't remember	Seldom	Can't remember	Can't remember	Can't remember	Seldom	Can't remember	Can't remember	No	No	No	No	No	No	No	No	No	No	Postdoc	Sought support from colleagues/friends/family	Fear of being fired		187	24
1	Principal Investigator	Male	White	46-55	Very often	Moderately	Moderately	Very often	Can't remember	Very often	Very often	Very often	Occasionally	Can't remember	Very often	Can't remember	Very often	Can't remember	Can't remember	Yes	No	Yes	Yes	Yes	Yes	No	Yes	Yes	No	Other	Sought support from colleagues/friends/family	Other	Unfair and biased	31
1	Group Leader	Female	White	36-45	Occasionally	Occasionally	Very often	Seldom	Very often	Very often	Occasionally	Occasionally	Moderately	Very often	Very often	Very often	Very often	Very often	Occasionally	Yes	No	No	Yes	Yes	Yes	Yes	No	Yes	Yes	Postdoc	Reported to my institution/body responsible for your institution		Unfair and biased	60
1	Group Leader	Male	White	36-45	Occasionally	Can't remember	Moderately	Occasionally	Seldom	Moderately	Seldom	Can't remember	Occasionally	Can't remember	Moderately	Can't remember	Seldom	Occasionally	Seldom	Yes	No	No	No	Yes	No	No	Yes	Yes	Yes	Graduate Student	Sought support from colleagues/friends/family	Fear of retaliation		31
1	Department Chair
1	Department Chair
1	Principal Investigator	Female	White	36-45	Very often	Very often	Very often	Very often	Very often	Occasionally	Moderately	Occasionally	Moderately	Moderately	Moderately	Seldom	Moderately	Seldom	Occasionally	Yes	No	Yes	Yes	Yes	Yes	No	Yes	No	Yes	Postdoc	Sought support from colleagues/friends/family	Fear of being fired	Other	187	45
1	Principal Investigator	Female	White	56-65	Occasionally	Occasionally	Seldom	Occasionally	Moderately	Seldom	Can't remember	Moderately	Seldom	Can't remember	Seldom	Moderately	Moderately	Moderately	Very often	No	No	No	No	No	No	Yes	No	No	Yes	Other	Used code of silence (did not report)	Fear of being fired	Other	187	33
1	Department Chair	Male	White	46-55	Occasionally	Seldom	Occasionally	Very often	Moderately	Moderately	Moderately	Very often	Moderately	Occasionally	Moderately	Moderately	Moderately	Moderately	Moderately	Yes	Yes	Yes	Yes	Yes	No	No	No	No	Yes	Undergraduate Student	Used code of silence (did not report)	Fear of retaliation		158
1	Department Chair	Male	Asian	56-65	Very often	Very often	Very often	Very often	Very often	Very often	Very often	Very often	Very often	Can't remember	Very often	Very often	Very often	Can't remember	Very often	No	No	No	No	Yes	No	No	No	No	Yes	Other	Reported to my institution/body responsible for your institution		Unfair and biased	31
1	Group Leader
1	Department Chair	Male	White	Over 66	Very often	Moderately	Very often	Very often	Very often	Very often	Very often	Moderately	Moderately	Very often	Very often	Seldom	Very often	Very often	Very often	No	No	No	No	Yes	No	No	No	No	No	Graduate Student	Reported to my institution/body responsible for your institution		Unfair and biased
1	Group Leader
1	Department Chair
1	Principal Investigator	Male	White	36-45	Can't remember	Very often	Moderately	Occasionally	Occasionally	Moderately	Can't remember	Can't remember	Moderately	Can't remember	Very often	Can't remember	Very often	Can't remember	Can't remember	No	No	No	No	No	No	No	No	No	Yes	Postdoc	Used code of silence (did not report)	Fear of being fired	Unfair and biased	187	39
1	Principal Investigator	Male	White	Over 66	Very often	Very often	Moderately	Moderately	Moderately	Very often	Occasionally	Moderately	Very often	Very often	Very often	Occasionally	Very often	Moderately	Moderately	Yes	No	No	Yes	Yes	Yes	Yes	Yes	Yes	Yes	Other	Other	Fear of retaliation	Unfair and biased	65
1	Principal Investigator	Male	Hispanic	56-65	Very often	Occasionally	Very often	Occasionally	Occasionally	Moderately	Very often	Moderately	Very often	Moderately	Very often	Seldom	Moderately	Very often	Very often	No	No	No	No	Yes	Yes	Yes	No	Yes	Yes	Postdoc	Reported to my institution/body responsible for your institution	Fear of retaliation	Unfair and biased	187	34
1	Principal Investigator	Female	East Indian	36-45	Occasionally	Very often	Very often	Very often	Very often	Very often	Very often	Very often	Occasionally	Can't remember	Can't remember	Occasionally	Can't remember	Very often	Very often	Yes	Yes	No	No	No	No	No	No	No	Yes	Postdoc	Reported to my institution/body responsible for your institution		Unfair and biased	187	4
1	Principal Investigator	Male	White	46-55	Moderately	Can't remember	Seldom	Can't remember	Moderately	Can't remember	Can't remember	Can't remember	Can't remember	Can't remember	Can't remember	Very often	Can't remember	Can't remember	Can't remember	No	No	No	No	No	No	No	No	No	Yes	Postdoc	Used code of silence (did not report)	Visa issues		187	51
1	Principal Investigator	Male	White	25-35	Very often	Very often	Very often	Very often	Very often	Very often	Very often	Very often	Very often	Very often	Moderately	Very often	Very often	Moderately	Moderately	No	No	No	No	Yes	Yes	Yes	No	No	No	Graduate Student	Reported to my institution/body responsible for your institution		Unfair and biased	187	6
1	Principal Investigator	Male	Asian	46-55	Very often	Very often	Very often	Very often	Very often	Seldom	Occasionally	Occasionally	Occasionally	Can't remember	Can't remember	Occasionally	Can't remember	Can't remember	Occasionally	No	No	Yes	No	No	No	No	No	No	No	Graduate Student	Used code of silence (did not report)	Other	Other
1	Group Leader	Male	White	36-45	Very often	Very often	Moderately	Moderately	Very often	Very often	Very often	Very often	Very often	Very often	Very often	Moderately	Very often	Very often	Very often	Yes	No	Yes	No	Yes	Yes	No	No	Yes	No	Graduate Student	Used code of silence (did not report)	Fear of being fired
1	Department Chair
1	Principal Investigator	Male	White	36-45	Very often	Very often	Very often	Very often	Very often	Very often	Very often	Very often	Can't remember	Very often	Very often	Very often	Very often	Very often	Very often	Yes	No	Yes	Yes	Yes	Yes	Yes	No	Yes	Yes	Undergraduate Student	Other	Fear of retaliation	Other	61
1	Group Leader	Male	White	46-55	Occasionally	Occasionally	Moderately	Seldom	Very often	Very often	Occasionally	Very often	Very often	Very often	Very often	Seldom	Very often	Seldom	Occasionally	No	No	No	Yes	Yes	No	No	No	No	No	Other	Sought support from colleagues/friends/family	Fear of retaliation	Unfair and biased	65
1	Group Leader	Female	Middle Eastern	56-65	Very often	Very often	Moderately	Very often	Moderately	Very often	Moderately	Very often	Very often	Very often	Very often	Seldom	Very often	Very often	Moderately	Yes	Yes	Yes	No	Yes	No	No	Yes	No	Yes	Graduate Student	Reported to my institution/body responsible for your institution	Fear of retaliation	Unfair and biased	185
1	Principal Investigator
1	Principal Investigator
1
1	Principal Investigator	Male	Asian	56-65	Occasionally	Occasionally	Moderately	Seldom	Moderately	Very often	Moderately	Moderately	Very often	Very often	Very often	Occasionally	Moderately	Very often	Very often	No	No	No	Yes	Yes	No	No	No	Yes	No	Postdoc	Reported to my institution/body responsible for your institution		Unfair and biased	185
1	Department Chair	Male	White	25-35	Moderately	Seldom	Occasionally	Can't remember	Very often	Very often	Seldom	Very often	Very often	Occasionally	Very often	Seldom	Seldom	Moderately	Very often	No	No	No	No	Yes	No	No	No	No	No	Postdoc	Reported to my institution/body responsible for your institution	Other	Unfair and biased	10
1	Principal Investigator	Male	White	46-55	Can't remember	Seldom	Can't remember	Occasionally	Can't remember	Occasionally	Can't remember	Moderately	Very often	Occasionally	Very often	Can't remember	Very often	Very often	Very often	Yes	No	No	Yes	No	Yes	Yes	No	No	Yes	Postdoc	Sought support from colleagues/friends/family	Fear of retaliation		82
1	Group Leader	Male	Hispanic	25-35	Moderately	Occasionally	Moderately	Can't remember	Can't remember	Very often	Can't remember	Can't remember	Very often	Very often	Occasionally	Very often	Moderately	Occasionally	Very often	Yes	No	Yes	Yes	Yes	Yes	Yes	Yes	No	Yes	Visiting Scientist/Researcher	Reported to my institution/body responsible for your institution	Fear of retaliation	Fair and unbiased	163
1	Principal Investigator
1	Principal Investigator
1	Department Chair
1	Department Chair
1	Group Leader
1	Group Leader
1	Principal Investigator	Female	Black or African American	56-65	Can't remember	Can't remember	Can't remember	Occasionally	Can't remember	Can't remember	Can't remember	Moderately	Very often	Can't remember	Moderately	Seldom	Moderately	Very often	Very often	No	No	No	Yes	Yes	No	No	No	No	No	Graduate Student	Reported to my institution/body responsible for your institution	Other	Other	187	44
1	Department Chair	Female	White	46-55	Occasionally	Very often	Seldom	Very often	Seldom	Very often	Seldom	Very often	Seldom	Can't remember	Very often	Can't remember	Very often	Moderately	Very often	Yes	No	No	Yes	Yes	No	No	Yes	No	Yes	Other	Reported to my institution/body responsible for your institution	Other	Other	187	37
1	Department Chair
1	Principal Investigator
1	Group Leader	Female	White	46-55	Occasionally	Moderately	Moderately	Very often	Moderately	Moderately	Occasionally	Very often	Very often	Very often	Occasionally	Can't remember	Can't remember	Can't remember	Very often	Yes	No	Yes	No	No	No	No	No	No	Yes	Undergraduate Student	Reported to my institution/body responsible for your institution		Unfair and biased	185
1	Group Leader	Male	White	56-65	Seldom	Occasionally	Can't remember	Seldom	Can't remember	Very often	Moderately	Moderately	Can't remember	Moderately	Moderately	Can't remember	Moderately	Seldom	Occasionally	Yes	No	No	No	Yes	Yes	Yes	No	No	Yes	Other	Reported to my institution/body responsible for your institution	Other	Unfair and biased	123
1	Principal Investigator	Male	Asian	46-55	Very often	Occasionally	Moderately	Moderately	Occasionally	Very often	Very often	Moderately	Can't remember	Can't remember	Can't remember	Seldom	Moderately	Occasionally	Seldom	No	No	No	No	No	No	No	No	Yes	No	Postdoc	Used code of silence (did not report)	Visa issues	Other	187	5
1	Lab Supervisor	Male	White	36-45	Occasionally	Occasionally	Occasionally	Seldom	Moderately	Occasionally	Seldom	Moderately	Very often	Very often	Very often	Very often	Very often	Very often	Can't remember	No	No	Yes	Yes	No	Yes	Yes	No	Yes	Yes	Graduate Student	Other	Fear of retaliation	Other	187	22
1	Department Chair	Male	White	46-55	Very often	Very often	Very often	Seldom	Moderately	Very often	Very often	Very often	Moderately	Can't remember	Occasionally	Very often	Can't remember	Very often	Very often	No	No	No	No	Yes	No	No	Yes	No	Yes	Other	Reported to my institution/body responsible for your institution	Fear of retaliation	Unfair and biased	187	33
1	Principal Investigator	Male	White	56-65	Can't remember	Occasionally	Can't remember	Can't remember	Can't remember	Seldom	Can't remember	Occasionally	Can't remember	Can't remember	Can't remember	Moderately	Occasionally	Seldom	Seldom	No	No	No	Yes	No	No	No	No	No	Yes	Graduate Student	Sought support from colleagues/friends/family	Fear of being fired		187	34
1
1	Department Chair
1	Department Chair	Male	White	36-45	Very often	Very often	Very often	Very often	Very often	Very often	Very often	Very often	Occasionally	Occasionally	Occasionally	Occasionally	Moderately	Occasionally	Moderately	No	No	No	No	No	No	No	No	No	No	Graduate Student	Used code of silence (did not report)	Fear of retaliation	Other	187	45
1	Principal Investigator	Male	White	46-55	Occasionally	Very often	Can't remember	Seldom	Occasionally	Occasionally	Moderately	Seldom	Can't remember	Can't remember	Moderately	Occasionally	Very often	Very often	Seldom	No	No	No	No	No	Yes	Yes	No	No	No	Graduate Student	Sought support from colleagues/friends/family			163
1	Principal Investigator
1	Department Chair
1	Department Chair
1	Department Chair	Male	White	56-65	Very often	Very often	Very often	Very often	Can't remember	Very often	Very often	Very often		Very often	Very often		Very often	Very often	Very often	Yes				Yes					Yes	Other	Other	Fear of retaliation		185
1	Principal Investigator
1	Principal Investigator	Female	Middle Eastern	46-55	Moderately	Very often	Seldom	Seldom	Occasionally	Moderately	Moderately	Moderately	Moderately	Moderately	Can't remember	Moderately	Occasionally	Seldom	Seldom	Yes	No	No	No	No	No	No	No	No	No	Graduate Student	Sought support from colleagues/friends/family			86
1	Principal Investigator	Female	Middle Eastern	46-55	Very often	Very often	Very often	Very often	Very often	Very often	Very often	Very often	Can't remember	Can't remember	Occasionally	Very often	Occasionally	Very often	Very often	No	No	Yes	Yes	No	Yes	Yes	No	Yes	Yes	Graduate Student	Sought support from colleagues/friends/family	Fear of retaliation		86
1	Principal Investigator	Male	Asian	25-35	Occasionally	Occasionally	Seldom	Seldom	Can't remember	Moderately	Moderately	Can't remember	Can't remember	Can't remember	Can't remember	Occasionally	Occasionally	Can't remember	Can't remember	No	No	No	No	No	No	No	No	No	No	Graduate Student	Sought support from colleagues/friends/family	Other		31
1	Principal Investigator	Male	White	46-55	Seldom	Very often	Occasionally	Occasionally	Moderately	Very often	Moderately	Very often	Very often	Very often	Very often	Can't remember	Seldom	Very often	Very often	No	No	Yes	No	No	Yes	Yes	No	Yes	Yes	Graduate Student	Reported to my institution/body responsible for your institution	Fear of retaliation	Unfair and biased	128	53
1	Department Chair
1	Principal Investigator	Male	White	46-55	Occasionally	Occasionally	Occasionally	Seldom	Occasionally	Occasionally	Occasionally	Seldom	Seldom	Can't remember	Very often	Can't remember	Very often	Seldom	Can't remember	Yes	No	No	Yes	Yes	Yes	Yes	No	No		Undergraduate Student	Sought support from colleagues/friends/family	Fear of retaliation
1	Department Chair	Prefer not to specify	White	Over 66	Occasionally	Can't remember	Occasionally	Can't remember	Occasionally	Occasionally	Occasionally	Can't remember	Can't remember	Can't remember	Can't remember	Can't remember	Can't remember	Can't remember	Can't remember	No	No	No	No	No	No	No	No	No	No	Graduate Student	Reported to my institution/body responsible for your institution		Unfair and biased	187	5
1	Principal Investigator	Male	East Indian	25-35	Very often	Very often	Very often	Very often	Can't remember	Very often	Very often	Very often	Very often	Very often	Very often	Very often	Very often	Very often	Very often	Yes		Yes	Yes	Yes						Postdoc	Sought support from colleagues/friends/family	Fear of retaliation		187	22
1	Lab Supervisor	Male	White	36-45	Can't remember	Can't remember	Can't remember	Can't remember	Can't remember	Can't remember	Can't remember	Can't remember	Can't remember	Can't remember	Can't remember	Can't remember	Can't remember	Can't remember	Can't remember	No	No	No	No	No	No	Yes	No	No	No	Postdoc	Used code of silence (did not report)	Fear of retaliation
1	Principal Investigator
1	Principal Investigator
1	Principal Investigator	Male	White	46-55	Occasionally	Occasionally	Moderately	Moderately	Very often	Seldom	Occasionally	Very often	Can't remember	Can't remember	Can't remember	Can't remember	Seldom	Moderately	Seldom	No	No	No	No	No	No	No	No	No	No	Postdoc	Sought support from colleagues/friends/family	Fear of retaliation	Other	123
1	Principal Investigator
1	Department Chair
1	Principal Investigator	Female	Asian	46-55	Occasionally	Seldom	Can't remember	Can't remember	Very often	Very often	Can't remember	Moderately	Occasionally	Can't remember	Can't remember	Can't remember	Occasionally	Very often	Moderately	Yes	No	No	No	No	No	No	No	No	Yes	Graduate Student	Sought support from colleagues/friends/family	Other	Other	10
1	Department Chair	Female	White	46-55	Very often	Very often	Occasionally	Occasionally	Very often	Very often	Very often	Very often	Seldom	Moderately	Very often	Very often	Occasionally	Occasionally	Moderately	No	No	No	No	Yes	No	No	No	No	No	Other	Sought support from colleagues/friends/family	Fear of retaliation		67
1	Principal Investigator	Female	White	36-45	Occasionally	Moderately	Occasionally	Occasionally	Very often	Moderately	Can't remember	Moderately	Very often	Seldom	Moderately	Occasionally	Very often	Very often	Moderately	Yes	No	No	No	No	No	Yes	No	No	No	Postdoc	Used code of silence (did not report)	Fear of retaliation		185
1	Department Chair	Female	White	25-35	Very often	Occasionally	Very often	Occasionally	Very often	Very often	Very often	Moderately	Very often	Very often	Can't remember	Moderately	Moderately	Occasionally	Seldom	No	No	No	No	Yes	No	No	No	No	No	Graduate Student	Used code of silence (did not report)	Fear of retaliation	Other	187	41
1	Principal Investigator	Male	White	56-65	Moderately	Seldom	Seldom	Moderately	Can't remember	Very often	Very often	Moderately	Can't remember	Moderately	Very often	Can't remember	Very often	Moderately	Seldom	Yes	Yes	No	Yes	No	No	No	No	No	Yes	Other	Sought support from colleagues/friends/family	Fear of being fired	Unfair and biased	122
1	Lab Supervisor	Male	White	36-45	Very often	Very often	Moderately	Moderately	Very often	Occasionally	Very often	Seldom	Seldom	Seldom	Seldom	Very often	Seldom	Occasionally	Occasionally	No	No	Yes	No	Yes	No	No	No	No	Yes	Other	Reported to my institution/body responsible for your institution	Fear of retaliation	Fair and unbiased	187	21
1	Principal Investigator	Male	White	56-65	Occasionally	Very often	Seldom	Occasionally	Seldom	Very often	Moderately	Seldom	Very often	Seldom	Occasionally	Seldom	Very often	Seldom	Seldom	Yes	No	No	No	Yes	No	No	No	No	Yes	Postdoc	Reported to my institution/body responsible for your institution		Other	65
1	Principal Investigator	Male	Asian	36-45	Very often	Very often	Moderately	Moderately	Very often	Very often	Very often	Very often	Occasionally	Moderately	Occasionally	Moderately	Moderately	Occasionally	Very often	No	No	No	Yes	No	No	No	No	No	Yes	Postdoc	Sought support from colleagues/friends/family	Fear of being fired	Other	187	45
1	Principal Investigator	Male	White	46-55	Seldom	Occasionally	Seldom	Seldom	Moderately	Moderately	Occasionally	Moderately	Seldom	Seldom	Moderately	Can't remember	Very often	Occasionally	Occasionally	No	No	No	No	No	No	Yes	No	No	No	Postdoc	Other	Fear of retaliation	Other	31
1	Principal Investigator	Male	White	46-55	Occasionally	Moderately	Moderately	Moderately	Very often	Occasionally	Moderately	Moderately	Very often	Occasionally	Seldom	Very often	Moderately	Moderately	Moderately	Yes	No	No	No	Yes	No	No	No	No	Yes	Other	Reported to my institution/body responsible for your institution	Fear of retaliation	Unfair and biased	82
1	Department Chair	Male	Mixed Race	36-45	Moderately	Moderately	Occasionally	Occasionally	Can't remember	Very often	Occasionally	Seldom	Seldom	Occasionally	Occasionally	Very often	Can't remember	Can't remember	Seldom	No	No	No	No	Yes	No	No	No	No	Yes	Other	Sought support from colleagues/friends/family	Fear of retaliation	Other	37	53
1	Department Chair	Female	White	46-55	Very often	Very often	Can't remember	Very often	Can't remember	Very often	Very often	Can't remember	Can't remember	Can't remember	Can't remember	Can't remember	Very often	Can't remember	Can't remember	Yes	No	No	Yes	Yes	No	No	No	No	Yes	Graduate Student	Used code of silence (did not report)	Fear of retaliation	Unfair and biased	185
1	Principal Investigator
1	Principal Investigator	Male	White	46-55	Can't remember	Can't remember	Can't remember	Can't remember	Occasionally	Can't remember	Seldom	Can't remember	Occasionally	Moderately	Occasionally	Occasionally	Occasionally	Moderately	Can't remember	No	No	Yes	Yes	No	No	Yes	No	No	No	Graduate Student	Used code of silence (did not report)	Fear of retaliation		185
1	Department Chair	Male	White	46-55	Seldom	Very often	Can't remember	Can't remember	Can't remember	Very often	Can't remember	Can't remember	Very often	Can't remember	Very often	Occasionally	Very often	Very often	Moderately	No	No	No	No	Yes	Yes	Yes	No	No	Yes	Other	Used code of silence (did not report)	Fear of being fired		169
1	Lab Supervisor
1	Principal Investigator	Male	White	46-55	Can't remember	Occasionally	Seldom	Seldom	Seldom	Occasionally	Seldom	Seldom	Moderately	Can't remember	Seldom	Occasionally	Occasionally	Very often	Very often	No	No	Yes	No	No	No	Yes	No	No	No	Postdoc	Sought support from colleagues/friends/family	Other	Other	31
1	Department Chair	Male	White	36-45	Occasionally	Very often	Can't remember	Moderately	Very often	Very often	Very often	Can't remember	Can't remember	Can't remember	Very often	Can't remember	Very often	Very often	Occasionally	No	No	No	No	No	No	Yes	No	No	No	Postdoc	Sought support from colleagues/friends/family	Other	Other	185
1	Department Chair	Male	White	56-65	Occasionally	Moderately	Moderately	Moderately	Occasionally	Moderately	Moderately	Occasionally	Very often	Moderately	Very often	Seldom	Occasionally	Occasionally	Moderately	Yes	No	No	No	No	No	No	Yes	No	Yes	Other	Sought support from colleagues/friends/family	Fear of retaliation	Other	169
1
1	Lab Supervisor	Male	White	25-35	Very often	Very often	Moderately	Moderately	Very often	Very often	Very often	Occasionally	Seldom	Seldom	Moderately	Very often	Occasionally	Very often	Seldom	No	No	No	No	Yes	No	No	No	No	Yes	Other	Reported to my institution/body responsible for your institution	Fear of retaliation	Fair and unbiased
1	Principal Investigator
1	Principal Investigator	Male	White	56-65	Very often	Occasionally	Moderately	Occasionally	Seldom	Moderately	Moderately	Seldom	Very often	Moderately	Very often	Seldom	Very often	Moderately	Can't remember	Yes	No	No	Yes	No	Yes	Yes	No	Yes	No	Postdoc	Other		Unfair and biased	185
1	Principal Investigator	Female	White	36-45	Occasionally	Occasionally	Moderately	Moderately	Occasionally	Very often	Moderately	Very often	Moderately	Seldom	Moderately	Occasionally	Moderately	Very often	Very often	Yes	No	Yes	No	Yes	Yes	No	Yes	No	No	Graduate Student	Reported to my institution/body responsible for your institution		Unfair and biased	187	39
1	Principal Investigator
1	Principal Investigator	Male	Asian	46-55	Very often	Moderately	Very often	Moderately	Occasionally	Very often	Very often	Can't remember	Can't remember	Occasionally	Very often	Very often	Very often	Very often	Very often	No	No	Yes	Yes	Yes	Yes	Yes	Yes	Yes	Yes	Postdoc	Reported to my institution/body responsible for your institution	Fear of retaliation	Unfair and biased	86	53
1	Department Chair	Female	Middle Eastern	46-55
1	Lab Supervisor	Female	White	36-45	Can't remember	Can't remember	Can't remember	Can't remember	Can't remember	Can't remember	Can't remember	Can't remember	Can't remember	Can't remember	Can't remember	Can't remember	Can't remember	Can't remember	Can't remember					Yes	Yes		Yes	Yes	Yes	Graduate Student	Used code of silence (did not report)	Fear of retaliation	Unfair and biased
1	Principal Investigator	Male	White	46-55	Very often	Occasionally	Seldom	Occasionally	Very often	Occasionally	Occasionally	Occasionally	Occasionally	Can't remember	Very often	Seldom	Very often	Moderately	Moderately	No	No	No	No	No	Yes	No	No	Yes	No		Used code of silence (did not report)	Visa issues		187	33
1	Principal Investigator	Male	White	46-55	Very often	Very often	Occasionally	Occasionally	Very often	Moderately	Very often	Occasionally	Very often	Very often	Very often	Very often	Very often	Very often	Very often	No	No	No	Yes	Yes	No	Yes	No	Yes	Yes	Postdoc	Used code of silence (did not report)	Fear of retaliation	Other	187	33
1	Department Chair	Prefer not to specify	Mixed Race	56-65	Occasionally		Occasionally	Occasionally		Occasionally	Occasionally	Occasionally	Very often	Occasionally		Occasionally		Occasionally	Occasionally	Yes		Yes							Yes	Graduate Student	Reported to my institution/body responsible for your institution		Unfair and biased	187	22
1	Department Chair	Male	Asian	36-45	Very often	Moderately	Can't remember	Can't remember	Occasionally	Can't remember	Moderately	Can't remember	Can't remember	Can't remember	Can't remember	Occasionally	Can't remember	Can't remember	Can't remember	No	No	No	No	No	No	No	No	No	No	Graduate Student	Used code of silence (did not report)	Fear of retaliation
1	Principal Investigator	Female	Asian	25-35	Very often	Very often	Can't remember	Very often	Very often	Moderately	Moderately	Moderately	Moderately	Can't remember	Can't remember	Very often	Very often	Moderately	Moderately	Yes	Yes	Yes	Yes	No	Yes	No	No	No	Yes	Graduate Student	Used code of silence (did not report)	Fear of retaliation		187	22
1	Principal Investigator	Male	Asian	Over 66	Very often	Moderately	Very often	Very often	Very often	Very often	Very often	Occasionally	Occasionally	Occasionally	Occasionally	Can't remember	Seldom	Can't remember	Very often	No	No	Yes	Yes	No	Yes	No	No	No	No	Graduate Student	Sought support from colleagues/friends/family	Fear of retaliation	Other	187	22
1	Principal Investigator	Male	White	56-65	Very often	Occasionally	Very often	Very often	Occasionally	Very often	Moderately	Very often	Occasionally	Can't remember	Seldom	Very often	Seldom	Seldom	Can't remember	Yes	No	Yes	No	Yes	No	No	No	No	Yes	Graduate Student	Sought support from colleagues/friends/family	Visa issues	Unfair and biased	65
1	Principal Investigator	Female	East Indian	36-45	Very often	Moderately	Moderately	Occasionally	Very often	Can't remember	Can't remember	Moderately	Seldom	Can't remember	Occasionally	Occasionally	Moderately	Moderately	Can't remember	No	No	No	Yes	No	No	Yes	No	No	No	Graduate Student	Sought support from colleagues/friends/family	Fear of retaliation	Unfair and biased	78
1	Principal Investigator
[truncated: 355 more rows]
