# Supplementary material
Source: Research Square preprint supplement (doi:10.21203/rs.3.rs-9269024/v1)
Supplement: Supplementary file 1 [file 575db98b44661d2352a57180.docx]

| 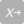 |
| --- |

Q2 Do you consent to participate in this research project?

- Yes (1)
- No (0)

| 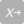 |
| --- |

Q3 Academic bullying is defined as sustained hostile behavior from one's academic superior including, but not limited to, ridiculing, threatening, blaming, invasion of privacy, put-downs in front of others as well as interference with matriculation and career progress including removing funding, writing falsely negative recommendation letters, taking credit for others' work and threatening to cancel visas or fellowships. 
 
Have you ever experienced (i.e. been the target of) academic bullying?

- Yes (1)
- No (0)

Saltar a: Q19 Si Academic bullying is defined as sustained hostile behavior from one's academic superior including... = No

Q4 You have indicated that you have directly experienced academic bullying. Which of the following types of individuals was the perpetrator? If more than one, please choose one and refer to this person when answering the remaining questions in this section.

- Principal Investigator (1)
- Lab Supervisor (2)
- Group Leader (3)
- Department Chair (4)
- Senior Colleague (6)
- Head of a Public Research Institute or Observatory (9)
- Head of Private company research group or lab (10)
- Other (7)

Saltar a: Q5 Si You have indicated that you have directly experienced academic bullying. Which of the following t... = Department Chair

Q5 If you answered "other" above, please fill in the type of perpetrator below.

________________________________________________________________

Q6 Please describe the perpetrator below.


Male or Female?

- Male (1)
- Female (2)
- Other (3)
- Prefer not to specify (4)

Q7 Was this person...

- White (1)
- Black or African American (2)
- American Indian or Alaska Native (3)
- Asian (4)
- Native Hawaiian or Pacific Islander (5)
- Hispanic (6)
- Mixed Race (7)
- Middle Eastern (8)
- East Indian (9)
- Other (10)

Q8 What is the approximate age of the perpetrator?

- 25-35 (1)
- 36-45 (2)
- 46-55 (3)
- 56-65 (4)
- 66 and over (5)

| 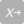 |
| --- |

Q9 How would you rank the university or institution which employs the perpetrator? Using the available link below (World University Rankings). Alternatively, you can use other ranking systems.  Please COPY and PASTE this URL into your browser in another tab so that you do not leave this survey.
 
https://www.timeshighereducation.com/world-university-rankings/2023/world-ranking#!/page/0/length/25/sort_by/rank/sort_order/asc/cols/stats

- Ranked 1-50 (1)
- Ranked 51-100 (2)
- Ranked 101-200 (3)
- Ranked 201-500 (4)
- Ranked 501-1000 (5)
- Ranked > 1000 (6)
- Non-ranked Research Institute or NGO (7)
- If your institution is not in the list, please add the name in the box below. (8)

Q10 If your institution is not on the list, please name the institution in which you work or the type of institution. If your institution is ranked above, you may also add the name of your institution if you'd like.

________________________________________________________________

Q11 What is the h-index of the perpetrator? Please look up on Google Scholar or Scopus if you don't have Google Scholar. Please COPY and PASTE this URL into another tab so that you do not leave this survey:
 
https://www.scopus.com
https://scholar.google.com/

________________________________________________________________

Q12 Please indicate the extent to which this person engages (or engaged if in the past) in the following behaviors toward you.

|  | I cannot remember him/her ever using this behavior with me (1) | He/she very seldom uses this behavior with me (2) | He/she occasionally uses this behavior with me (3) | He/she uses this behavior moderately often with me (4) | He/she uses this behavior very often with me (5) |
| --- | --- | --- | --- | --- | --- |
| Ridicules me. (1) |  |  |  |  |  |
| Reminds me of my past failures or mistakes. (2) |  |  |  |  |  |
| Tells me my thoughts or feelings are stupid. (3) |  |  |  |  |  |
| Tells me I'm incompetent. (4) |  |  |  |  |  |
| Expresses anger at me when he/she is mad for another reason. (5) |  |  |  |  |  |
| Makes negative comments about me to others. (6) |  |  |  |  |  |
| Puts me down in front of others. (7) |  |  |  |  |  |
| Blames me to save him/herself embarrassment. (8) |  |  |  |  |  |
| Gives me the silent treatment. (9) |  |  |  |  |  |
| Does not allow me to interact with my coworkers. (10) |  |  |  |  |  |
| Doesn't give me credit for my work. (11) |  |  |  |  |  |
| Invades my privacy. (12) |  |  |  |  |  |
| Doesn't give me credit for jobs requiring a lot of effort (13) |  |  |  |  |  |
| Breaks promises he/she makes (14) |  |  |  |  |  |
| Lies to me (15) |  |  |  |  |  |

| 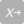 |
| --- |

Q13 Has this person ever directed any of the following behaviors toward you?

|  | Yes (1) | No (0) |
| --- | --- | --- |
| Gave me a bad/unfair recommendation (1) |  |  |
| Cancelled or threatened to cancel my visa/work permit (2) |  |  |
| Unnecessarily lengthened my stay in his/her lab (3) |  |  |
| Took away my funding or threatened to take away my funding (4) |  |  |
| Encouraged others to mistreat me (5) |  |  |
| Used my data in papers/patents without acknowledging my contribution (6) |  |  |
| Violated authorship contribution guidelines (if existed) (7) |  |  |
| Forced me to sign away my rights (8) |  |  |
| Violated my intellectual property rights (9) |  |  |
| Cancelled or threatened to cancel my current appointment/position (10) |  |  |

Q14 What was your position when you were the target of academic bullying?

- Postdoc (1)
- Visiting Scientist/Researcher/Student (2)
- Graduate Student (3)
- Undergraduate Student (4)
- Other (5)

Q15 Which option did you choose in response to academic bullying?

- Used code of silence (did not report) (1)
- Reported to my institution/body responsible for your institution (2)
- Sought support from colleagues/friends/family (3)
- Other (4)

Q16 If you did not report, what was the primary reason?

- Fear of retaliation (1)
- Visa issues (2)
- Fear of being fired (3)
- Other (4)

Q17 If you did report the bullying, how would you describe the outcome?

- Fair and unbiased (1)
- Unfair and biased (2)
- Other (3)

Q18 Please provide more details on how you responded to the bullying? For example, did you speak up or complain? If so, to whom? What was the outcome? Did you experience any retaliation? If you did not speak up or complain, what stopped you? Please share as much as you can.

________________________________________________________________

| 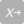 |
| --- |

Q19 Have you ever witnessed academic bullying (with someone else as the target)?

- Yes (1)
- No (0)

Saltar a: Q39 Si Have you ever witnessed academic bullying (with someone else as the target)? = No

Q20 You have indicated that you have witnessed academic bullying. Which of the following types of individuals was the perpetrator? *If more than one, please choose one and refer to this person* when answering the remaining questions in this section.

- Principal Investigator (1)
- Lab Supervisor (3)
- Group Leader (2)
- Department Chair (4)
- Senior Colleague (6)
- Other (5)

Saltar a: Q21 Si You have indicated that you have witnessed academic bullying. Which of the following types of ind... = Other

Q21 If you responded "other" above, please indicate the type of perpetrator below:

________________________________________________________________

Q22 Please describe the perpetrator below.


Male or Female?

- Male (1)
- Female (2)
- Other (3)
- Prefer not to Specify (4)

Q23 Was the perpetrator...

- White (1)
- Black or African American (2)
- American Indian or Alaska Native (3)
- Asian (4)
- Native Hawaiian or Pacific Islander (5)
- Hispanic (6)
- Mixed Race (7)
- Middle Eastern (8)
- East Indian (9)
- Other (10)

Q24 What is the approximate age of the perpetrator?

- 25-35 (1)
- 36-45 (2)
- 46-55 (3)
- 56-65 (4)
- 66 and over (5)

| 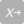 |
| --- |

Q25
How would you rank the university or institution which employs the perpetrator? You can find your university ranking using the World University Rankings using the link below if you'd like. **Please COPY and PASTE this URL into your browser in another tab so that you do not leave this survey.**

 https://www.timeshighereducation.com/world-university-rankings/2023/world-ranking#!/page/0/length/25/sort_by/rank/sort_order/asc/cols/stats
  

- Ranked 1-50 (1)
- Ranked 51-100 (2)
- Ranked 101-200 (3)
- Ranked 201-500 (4)
- Ranked 501-1000 (5)
- Ranked > 1000 (6)
- Non-Ranked Research Institution or NGO (7)
- If your institution is not in the list, please add the name in the box below. (8)

Q26 If your institution is not on the list, please name the institution in which you work or the type of institution. If your institution is ranked above, you may also list your institution if you'd like.

________________________________________________________________

Q27
What is the h-index of the perpetrator? Use this resource if you don't have Google Scholar. **Please COPY and PASTE this URL into another tab so that you do not leave this survey:**

 https://www.scopus.com
 
https://scholar.google.com

________________________________________________________________

Q28 Having witnessed academic bullying (i.e. someone other than you was the target), please indicate the extent to which you've seen the perpetrator described above engage in the following behaviors toward another person or persons.

|  | I cannot remember his/her ever using this behavior with other(s) (1) | He/she seldom uses this behavior with other(s) (2) | He/she occasionally uses this behavior with other(s) (3) | He/she uses this behavior moderately often with other(s) (4) | He/she uses this behavior very often with other(s) (5) |
| --- | --- | --- | --- | --- | --- |
| Ridicules another/others (1) |  |  |  |  |  |
| Reminds another/others of their past mistakes and failures (2) |  |  |  |  |  |
| Tells another/others their thoughts and feelings are stupid (3) |  |  |  |  |  |
| Tells another/others they are incompetent (4) |  |  |  |  |  |
| Expresses anger at another/others when he/she is mad for another reason. (5) |  |  |  |  |  |
| Makes negative comments about another to others. (6) |  |  |  |  |  |
| Puts another down in front of others. (7) |  |  |  |  |  |
| Blames another/others to save him/herself embarrassment. (8) |  |  |  |  |  |
| Gives another/others the silent treatment. (9) |  |  |  |  |  |
| Does not allow another/others to interact with their coworkers. (10) |  |  |  |  |  |
| Does not give another/others credit for their work. (11) |  |  |  |  |  |
| Invades the privacy of another/others. (12) |  |  |  |  |  |
| Doesn't give another/others credit for jobs requiring a lot of effort (14) |  |  |  |  |  |
| Breaks promises he/she makes to another/others (15) |  |  |  |  |  |
| Lies to another/others. (13) |  |  |  |  |  |

| 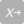 |
| --- |

Q29 Did this person ever direct any of the following behaviors toward the target(s)/victim(s)?

|  | Yes (1) | No (0) |
| --- | --- | --- |
| Gave a bad/unfair recommendation. (1) |  |  |
| Cancel or threaten to cancel the target's visa. (2) |  |  |
| Unnecessarily lengthened the target's stay in the perpetrator's lab. (3) |  |  |
| Took away or threatened to take away the target's funding. (4) |  |  |
| Encouraged others to mistreat the target. (5) |  |  |
| Used another's data in papers/patents without acknowledging their contribution (6) |  |  |
| Violated authorship contribution guidelines (7) |  |  |
| Forced another to sign away his or her rights (8) |  |  |
| Violated another's intellectual property rights (9) |  |  |
| Cancelled or threatened to cancel another's current appointment/position (10) |  |  |

Q30 What was the target's (victim's) position at the time of the abuse?

- Postdoc (6)
- Visiting Scientist/Researcher/Student (7)
- Graduate Student (8)
- Undergraduate Student (9)
- Other (10)

| 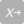 |
| --- |

Q31 What was the victim's gender?

- Male (1)
- Female (2)
- Other (3)
- Prefer not to Specify (4)

| 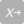 |
| --- |

Q32 What was the victim's ethnicity?

- White (1)
- Black or African American (2)
- American Indian or Alaska Native (3)
- Asian (4)
- Native Hawaiian or Pacific Islander (5)
- Hispanic (6)
- Mixed Race (7)
- Middle Eastern (8)
- East Indian (9)
- Other (10)

Q33 Was the victim a citizen of the country in which the bullying took place?

- Yes (1)
- No (2)

Q34 How did the victim respond to the academic bullying?

- Used code of silence (did not report) (4)
- Reported to his/her institution (5)
- Sought support from colleagues/friends/family (6)
- Other (7)

Q35 How did you respond to the bullying?

- Used code of silence (did not report) (4)
- Reported to the victim's institution (5)
- Supported colleague (6)
- Other (7)

Q36 If you or the victim reported the incident(s), how would you describe the outcome?

- Fair and unbiased (1)
- Unfair and biased (2)
- Other (3)

Q37 If you did not report, what was the primary reason?

- Fear of retaliation (1)
- Visa issues (2)
- Fear of being fired (3)
- Other (4)

Q38 Please provide more details on how you responded to the bullying? For example, did you speak up or complain? If so, to whom? What was the outcome? Did you experience any retaliation? If you did not speak up or complain, what stopped you? Please share as much as you can.

________________________________________________________________

Q39 Please tell us anything you'd like to about yourself (Note: We will only use this information in the aggregate to determine trends).

________________________________________________________________

Q40 What is your gender?

- Male (1)
- Female (2)
- Other (3)
- Prefer not to specify (4)

| 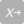 |
| --- |

Q41 What is your current role?

- Senior Faculty (1)
- Junior Faculty (2)
- Postdoc (3)
- Visiting Scientist/Researcher/Student (4)
- Graduate Student (5)
- Undergraduate Student (6)
- Other (7)

Q42 Which of the following best describes your top area of research?

- Life Science (1)
- Molecular Biology (2)
- Chemistry (3)
- Physical Science (4)
- Biotech/Pharma (5)
- Clinical Science (6)
- Genetics (7)
- Engineering (8)
- Cancer Research (9)
- Immunology (10)
- Earth Science (11)
- Neuroscience (12)
- Maths/Computational (13)
- Social Sciences (14)
- Psychology (16)
- Education (17)
- Other (15)

Q43 If you answered "Other" above, please write in your top area of research.

________________________________________________________________

Q44 Were you a citizen of the country in which you studied or worked (where the bullying took place)?

- Yes (1)
- No (2)

Q45 What is your ethnicity?

- White (1)
- Black or African American (2)
- American Indian or Alaska Native (3)
- Asian (4)
- Native Hawaiian or Pacific Islander (5)
- Hispanic (6)
- Mixed Race (7)
- Middle Eastern (8)
- East Indian (9)
- Other (10)

| 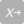 |
| --- |

Q46 In which country did the bullying take place?

▼ Afghanistan (1) ... Zimbabwe (195)

| 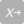 |
| --- |

Q47 If the bullying took place in the U.S., please indicate the state.

▼ Alabama (1) ... I do not reside in the United States (53)
